# Supplementary material
Source: MDPI journal article supplement (https://www.mdpi.com/2076-3263/12/4/173)
Supplement: s1 [file s1]

### Supplementary material

As supplementary material we propose a publication, in which there is the first preliminary attribution of macroseismic intensity for the 1980 earthquake: "Il terremoto del 23-11-1980. Rilievo Macrosismico Stato di Avanzamento al 27-1-1981" [29] and some topographic maps of the effects induced by the 1980 Irpinia-Lucania earthquake, which were plotted in the field.

Soon after the November 23, 1980 Irpinia - Lucania earthquake, several groups of geologists of the CNR-PFG projects, mapped the coseismic geological effects in a wide portion of the epicentral area.

We include some of the original sketch of topographic maps (from 1:25.000 topographic maps of Istituto Geografico Militare, I.G.M., 1955) saved as a historical record of the time, that the Professor Paolo Scandone, as leader of PFG project, made available many years after the earthquake on which the coseismic effects of the 1980 earthquake were mapped.

On the excerpts of the topographic maps mainly earthquake-induced fractures are shown, and in some cases it has been marked occurrence of landslides as well as portions of earthquake-induced faults. Although it must be pointed out that many researchers at the time did not believe that these faults were of tectonic origin but ascribed all of them either to pure gravitative sliding or to debris compactation [11]. Only a few Italian researchers interpreted as due tectonic origin the fractures occurred along the Piano di Pecore on Mt. Marzano (186 Colliano IISW), or Sele Valley and at Pantano di S. Gregorio Magno (198 Buccino, I, NE; 199 Vietri di Potenza, IV, NW) [9,10], as later documented by several researchers who reconstructed the end to end seismogenic fault segments [12-17].

As supplementary material, the following are the cartographic union framework of the 1: 25,000 topographic maps attached and the extracts of these maps on which are mapped the coseismic effects detected during the field survey:

- Map union framework
- 174\_Frigento IIIE
- 174\_MIRABELLA\_ECLANO\_III\_SO
- 174\_VALLATA\_II\_SO;
- 186 Calabritto IINW e Caposele
- 186 Calitri IE
- 186 Colliano IISW
- 186 Lioni IVSE
- 186 MONTEMARANO\_IV\_NO
- 186 Teora ISW
- 186\_MONTELLA\_IV\_SO
- 186\_S.\_ANGELO\_DEI\_LOMBARDI\_IV\_NE
- 198\_BUCCINO\_I\_NE
- 198\_CONTURSI\_I\_NO
- 199 VIETRI DI POTENZA IV NO

**CONSIGLIO NAZIONALE DELLE RICERCHE  
PROGETTO FINALIZZATO GEODINAMICA**

**IL TERREMOTO DEL 23-11-1980  
RILIEVO MACROSISMICO  
STATO DI AVANZAMENTO AL 27-1-1981**

**CONVEGNO STRAORDINARIO  
DEL PROGETTO FINALIZZATO GEODINAMICA**

**Roma 27-28 Gennaio 1981**

Le operazioni di rilevamento dei dati macrosismici sono state effettuate da un gruppo composto dai seguenti ricercatori:

Postpischi Daniele - Università di Bologna - Coordinatore

MERCU Giovanni Ist. di Geologia - Camerino

PERGALANI FLORIANA " " "

PUGLIELLI Carmen " " "

SIGNANINI Patrizio " " "

LA BAGNARA Rosario " " "

BONARDI Glauco Ist. Geol. e Geof. - Napoli

CARANNANTE Gabriele " " " "

ORTOLANI Franco " " " "

ORSI Giovanni " " " "

PERRONE Vincenzo " " " "

SIMONI Lucia " " " "

NIETO Daniel Osserv. Geof. Sperim. - Trieste

GIOVANI Luciano Ist. Naz. Geofisica

SCALERA Giancarlo " " " "

SPADEA Cecilia " " " "

VECCHI Maurizio " " " "

DE MARTIN Martina Ist. Geofis. Litosfera - Milano

ROSSI Bruno " " " "

STUCCHI Massimiliano " " " "

BOTTARI Antonino Ist. Geofis. (ME)

LO GIUDICE Emanuele I.I.V. - Catania

SCHIAVONE Domenico Ist. Geofisico - Bari

ALTERISIO Antonio Coll. Est. Ist. Geol. e Geofis. e Oss. Ves.

ANGIULLI Gabriella " " " " " " "

|                     |                                             |
|---------------------|---------------------------------------------|
| BALDASSARRE Rossana | Coll. Ester. Ist. Geol. e Geof. e Oss. Ves. |
| BRANNO Antonio      | " " " " " "                                 |
| ESPOSITO Eliana     | " " " " " "                                 |
| FERRIGNO Marcello   | " " " " " "                                 |
| GAUDIOSI Germana    | " " " " " "                                 |
| LA FRATTA Rocco     | " " " " " "                                 |
| MALAFRONTI Antonio  | " " " " " "                                 |
| MARINACCI Paolo     | " " " " " "                                 |
| MARTURANO Aldo      | " " " " " "                                 |
| PORFIDO Sabina      | " " " " " "                                 |
| RINALDIS Vittorio   | " " " " " "                                 |

BERSANI Adolfo

Ist. Geol. Applicata - Roma

D'ANGELO Franco

E.N.A.I.P. - Napoli

FERRARI Graziano

Istituto di Topografia, Geodesia e  
Geofisica Mineraria - Bologna

BONARDI Elio

Geometra - Coll. Esterno



## PREMESSA

Il rilievo macrosismico che si effettua a seguito di un terremoto ha come scopo la descrizione, a diverse scale, della interazione fra il terremoto stesso ed il territorio, inteso nella sua accezione più generale di distribuzione di beni, oggetti e persone in un certo ambiente geomorfologico. Tale rilievo viene eseguito classificando secondo apposite scale gerarchiche di severità -le scale Mercalli e derivate- gli effetti macroscopici osservati sul territorio a seguito del terremoto.

Il risultato del rilievo tende ad assumere il significato di una immagine dalla distribuzione areale della "forza" del terremoto.

E' noto infatti che l'entità del danneggiamento in una località dipende in generale, oltre che dalla "forza" del terremoto in quel punto, da una serie di fattori, quali ad esempio la qualità e le condizioni degli edifici, la situazione geomorfologica, l'effetto di particolari situazioni topografiche ecc.

Una volta analizzata in dettaglio e quantificata l'incidenza di questi fattori sarà possibile produrre un elaborato che rappresenti la distribuzione degli effetti quale si avrebbe, ad esempio, in occasione di un terremoto analogo a quello del 23. 11. 80, se il territorio fosse coperto da edifici omogenei situati in località omogenee. E' ovvio che un elaborato di questo tipo può servire in una prospettiva di ricostruzione e programmazione del territorio stesso.

Nelle zone più colpite, una notevole parte degli effetti macrosismici osservabile è rappresentata dai danni agli edifici: il rilievo macrosismico fornisce quindi anche un'immagine complessiva della distribuzione del danneggiamento.

Stante l'obiettivo del rilievo descritto in precedenza, la prospettiva con la quale questo danneggiamento viene osservato e classificato può essere diverso da quella secondo cui operano altre iniziative analoghe. Il rilievo dei danni, nel nostro caso, ad esempio non tende ad una valutazione in termini di riparabilità,

tecnica ed economica, degli edifici, quanto ad una stima dell'effetto sismico che ha provocato il danno.

Questo comporta alcune differenze metodologiche, quali ad esempio:

- il rilevamento danni procede per analisi puntuali, edificio per edificio, cumulando gli effetti, mentre il rilievo macrosismico procede per analisi areale, ossia individua aree omogenee come danneggiamento, ed opera su campioni differenziati per tipologia costruttiva;
- le stime percentuali delle classi di danno, pur potendo avere denominazioni uguali (crolli parziali, lesioni profonde, ecc.) possono assumere significati diversi;
- la rilevanza del danno ad alcuni elementi strutturali (scale, tramezzi, ecc.) può essere diversa nei due tipi di rilievo.

Nelle figure allegate sono presentati i risultati preliminari del rilievo, in termini di scale M C S (Mercalli - Cancani - Sieberg) ed M S K (Medvedev - Sponheuer - Karnik).

Le aree contrassegnate da un ben determinato grado non devono essere intese come aree nelle quali si è realmente osservato un effetto macrosismico corrispondente a quel grado, quanto come aree nelle quali la "forza" del terremoto è stata, a quella scala, omogenea.

A parte possibili errori di valutazione (il rilievo è in corso di revisione e completamento), le differenze riscontrabili, e riscontrate in certi punti, tra grado dell'area in cui cadono e grado effettivamente osservato, sono generalmente reali, e attribuibili a cause locali di origine diversa. (Fa eccezione a questo discorso l'area di Montella, Bagnoli Irpino, Cassano Irpino, ecc.).

L'elenco delle località, con l'assegnazione del grado, è l'elenco delle località visitate: esso non esaurisce pertanto la totalità delle località che potrebbero essere state interessate da effetti di un determinato grado. Per le località non comprese nell'elenco, il grado relativo è provvisoriamente deducibile da quello dell'area in cui cade.

## 1 - INTRODUZIONE

Il Progetto Finalizzato Geodinamica nel corso di una riunione tenuta a Napoli il giorno 25.11.1980, decise per un intervento coordinato nella zona interessata dal terremoto del 23.11.1980.

L'intervento ha avuto inizio il giorno 26 e si articola nei seguenti settori:

- 1) osservazione strumentale della sismicità
- 2) rilievi macrosismici (sismologia non strumentale)
- 3) rilievi geologici
- 4) rilievi di tipo ingegneristico

Per quanto riguarda il tema rilievi macrosismici, 40 ricercatori con competenze nei settori: sismologia, geologia e ingegneria strutturale, hanno operato per un periodo complessivo di 16 giorni, visitando 306 centri abitati dell'area maggiormente colpita dal terremoto.

L'obiettivo dell'intervento è quello di raccogliere il maggiore numero di evidenze sperimentali sul processo di interazione tra il terremoto e il territorio, inteso nella sua accezione più generale di distribuzione di beni in un certo ambiente geomorfologico.

E' stato quindi necessario organizzare la raccolta di informazioni macrosismiche in modo tale che la classificazione degli effetti del terremoto sulle persone, sugli oggetti di uso comune, sulle cose, sulle costruzioni e in generale sull'ambiente, contenesse parametri utili per la costruzione di un modello della interazione terremoto-territorio, in particolare per quello che riguarda gli effetti di amplificazione locale.

Il confronto del recente terremoto con gli altri eventi che hanno interessato storicamente la zona (tabella 1), risulta particolarmente interessante con il terremoto dell'8.9.1694 che da un pri

TABELLA I

ELENCO DEI TERREMOTI CON  $I_0 \geq IX$  MCS NELL'ITALIA MERIDIONALE (FINO AL CONFINE

LUCANIA-CALABRIA)

| DATA |      |        | COORDINATE |             | $I_0$ | LOCALITA'          |
|------|------|--------|------------|-------------|-------|--------------------|
| Anno | Mese | Giorno | Latitudine | Longitudine |       |                    |
| 63   | 2    | 5      | 40.8       | 14.5        | 10    | Napoletano         |
| 324  | 8    | 6      | 41         | 14          | 10    | Campania           |
| 344  | 8    | 6      | 41         | 14          | 10    | Campania           |
| 369  | -    | -      | 41.1       | 14.8        | 10    | Benevento          |
| 847  | 6    | -      | 41.5       | 14.2        | 10    | Benevento-Isernia  |
| 853  | -    | -      | 41.5       | 14.5        | 10    | Campobasso         |
| 936  | -    | -      | 41         | 14          | 9     | Napoli (?)         |
| 990  | -    | -      | 41.2       | 14.7        | 10    | Benevento-Ariano   |
| 1087 | -    | -      | 41         | 17          | 9     | Puglia             |
| 1095 | 1    | 1      | 41.2       | 14.7        | 9     | Benevento          |
| 1125 | 10   | 11     | 41.2       | 14.7        | 10    | Benevento          |
| 1139 | 1    | 22     | 41.2       | 14.7        | 9     | Benevento          |
| 1180 | -    | -      | 41.2       | 15.0        | 10    | Ariano-Napoli      |
| 1223 | -    | -      | 41.5       | 15.7        | 10    | Gargano            |
| 1273 | -    | -      | 40.5       | 15.7        | 10    | Basilicata         |
| 1282 | -    | -      | 40.7       | 14.5        | 9     | Napoli (?)         |
| 1309 | 7    | 11     | 41.5       | 14.5        | 9     | Molise             |
| 1361 | 7    | 17     | 41.2       | 15.5        | 9     | Foggia             |
| 1414 | -    | -      | 41.5       | 16.2        | 9     | Gargano            |
| 1448 | -    | -      | 40.7       | 14.2        | 9     | Napoli             |
| 1456 | 12   | 5      | 41.2       | 14.7        | 11    | Campania           |
| 1550 | 8    | 25     | 40.7       | 15.0        | 9-10  | Vallo di Diano     |
| 1560 | 5    | 11     | 41.2       | 16.2        | 9     | Puglia             |
| 1561 | 7    | 31     | 40.5       | 15.5        | 9     | Vallo di Diano     |
| 1561 | 8    | 19     | 40.5       | 15.5        | 10    | Vallo di Diano     |
| 1627 | 7    | 30     | 41.7       | 15.2        | 10    | Gargano            |
| 1627 | 8    | 9      | 41.7       | 15.2        | 9     | Gargano            |
| 1646 | 5    | 31     | 42.0       | 15.7        | 10    | Gargano            |
| 1654 | 9    | 8      | 41.0       | 15.7        | 9     | Potenza            |
| 1688 | 7    | 5      | 41.2       | 14.7        | 10    | Benevento          |
| 1694 | 9    | 8      | 40.7       | 15.5        | 10    | Lucania-Irpinia    |
| 1702 | 3    | 14     | 41.2       | 15.0        | 10    | Benevento          |
| 1731 | 3    | 20     | 41.5       | 15.5        | 10    | Foggia             |
| 1732 | 11   | 29     | 41.1       | 15.1        | 10    | Avellino           |
| 1805 | 7    | 26     | 41.5       | 15.5        | 11    | Molise             |
| 1826 | 2    | 1      | 40.6       | 15.7        | 9     | Tito (Lucania)     |
| 1836 | 11   | 20     | 40.1       | 15.7        | 9     | Lagonero (Lucania) |
| 1851 | 8    | 14     | 41.0       | 15.7        | 10    | Vulture            |
| 1853 | 4    | 9      | 40.8       | 15.2        | 9     | Avellino           |
| 1857 | 12   | 16     | 40.3       | 15.9        | 10    | Basilicata         |
| 1881 | 4    | 3      | 40.7       | 13.9        | 9     | Ischia             |
| 1883 | 7    | 28     | 40.7       | 13.9        | 9     | Ischia             |
| 1893 | 8    | 10     | 41.7       | 16.1        | 9     | Gargano            |
| 1910 | 6    | 6      | 40.9       | 15.4        | 10    | Irpinia            |
| 1930 | 7    | 23     | 41.1       | 15.4        | 10    | Irpinia            |
| 1962 | 8    | 21     | 41.1       | 15.1        | 9     | Irpinia            |

mo esame risulta avere interessato praticamente la stessa area.

L'intervento si è sviluppato in tre fasi di cui una ancora in corso e prevede una quarta e ultima fase per le interpretazioni finali.

1° Fase - Il primo problema è stato quello di organizzare un numero adeguato di squadre con competenze multidisciplinari, da distribuire sul territorio interessato dal terremoto.

L'indagine è stata sviluppata da otto gruppi composti da geologi, sismologi e strutturisti, che hanno percorso il territorio secondo diverse aree di competenza e con finalità diverse. Quattro di questi gruppi avevano infatti come obiettivo della prima settimana di lavoro la modellazione dell'area in cui gli effetti possono essere classificati come corrispondenti all'VIII grado della scala di intensità MSK. Altri tre gruppi avevano invece come obiettivo la realizzazione di un quadro di prima approssimazione della distribuzione degli effetti fino al VI grado MSK. Un gruppo si è occupato dell'area epicentrale e un ultimo gruppo ha esteso le sue indagini verso sud fino in Sicilia interessandosi alle aree che non hanno subito danneggiamenti.

La seconda settimana ha visto operare nuove squadre con l'obiettivo di aumentare il numero di punti del piano quotato nell'area corrispondente ad effetti maggiori o uguali al VI grado MSK.

II° fase - Successivamente a partire dalla 11.12.1980 l'attività è stata orientata alla revisione critica del materiale raccolto e alla produzione di una prima interpretazione in termini di isosisme fino al VI grado MSK. Hanno partecipato a questa fase, presso l'Osservatorio Vesuviano, un gruppo limitato di operatori: A. Marturano, V. Rinaldis, A. Branno, G. Gaudiosi, S. Porfido, E. Esposito, R. Baldassarre; e con interventi per periodi diversi: D. Nieto, D. Postpischl, G. Ferrari e M. Stucchi.

III° fase - Raccolta delle informazioni per le aree interessate da effetti inferiori al VI grado MSK. Tale fase è attualmente in corso e prevede l'utilizzo del questionario dell'Istituto Nazionale di Geofisica che gestisce una rete di raccolta di notizie macrosismiche costituita dalle stazioni dei Carabinieri.

Sono pervenuti circa 300 questionari, distribuiti tuttavia in modo non ancora omogeneo in quanto lasciano scoperte intere regioni. Dai dati disponibili si può tuttavia in via preliminare ricavare le seguenti indicazioni:

- a) il passaggio dall'area di sesto a quello di quinto segue approssimativamente la valle del Biferno
- b) il passaggio all'area di quarto avviene approssimativamente nelle province dell'Aquila e di Teramo
- c) il passaggio all'area di terzo avviene nelle province di Pesaro e Urbino.

A sud dell'epicentro i primi risultati forniti dall'U.O. 2.2.3 dell'Università di Messina, da intendersi ancora come del tutto preliminari, permettono le seguenti considerazioni:

- a) l'area di settimo racchiude ad Ovest i Monti Alburni e la sua propaggine meridionale comprende il lago di Pietra di Pertusillo presso Montemurro nella Valle dell'Agri
- b) l'area di sesto comprende il Cilento e la restante parte della Basilicata meridionale fino al Pollino
- c) il passaggio al quinto avviene all'incirca lungo il confine calabro-lucano
- d) il passaggio dal quinto al quarto, tuttora poco definito, si osserva a sud di Cosenza tra la Sila grande e la Sila piccola
- e) il passaggio dal quarto al terzo avviene nella piana di Gioia Tauro
- f) l'area di terzo si estende dalla piana di Gioia Tauro sino al versante sud-occidentale dell'Etna.
- g) al momento l'avvertibilità è stata osservata fino alla provincia di Enna.

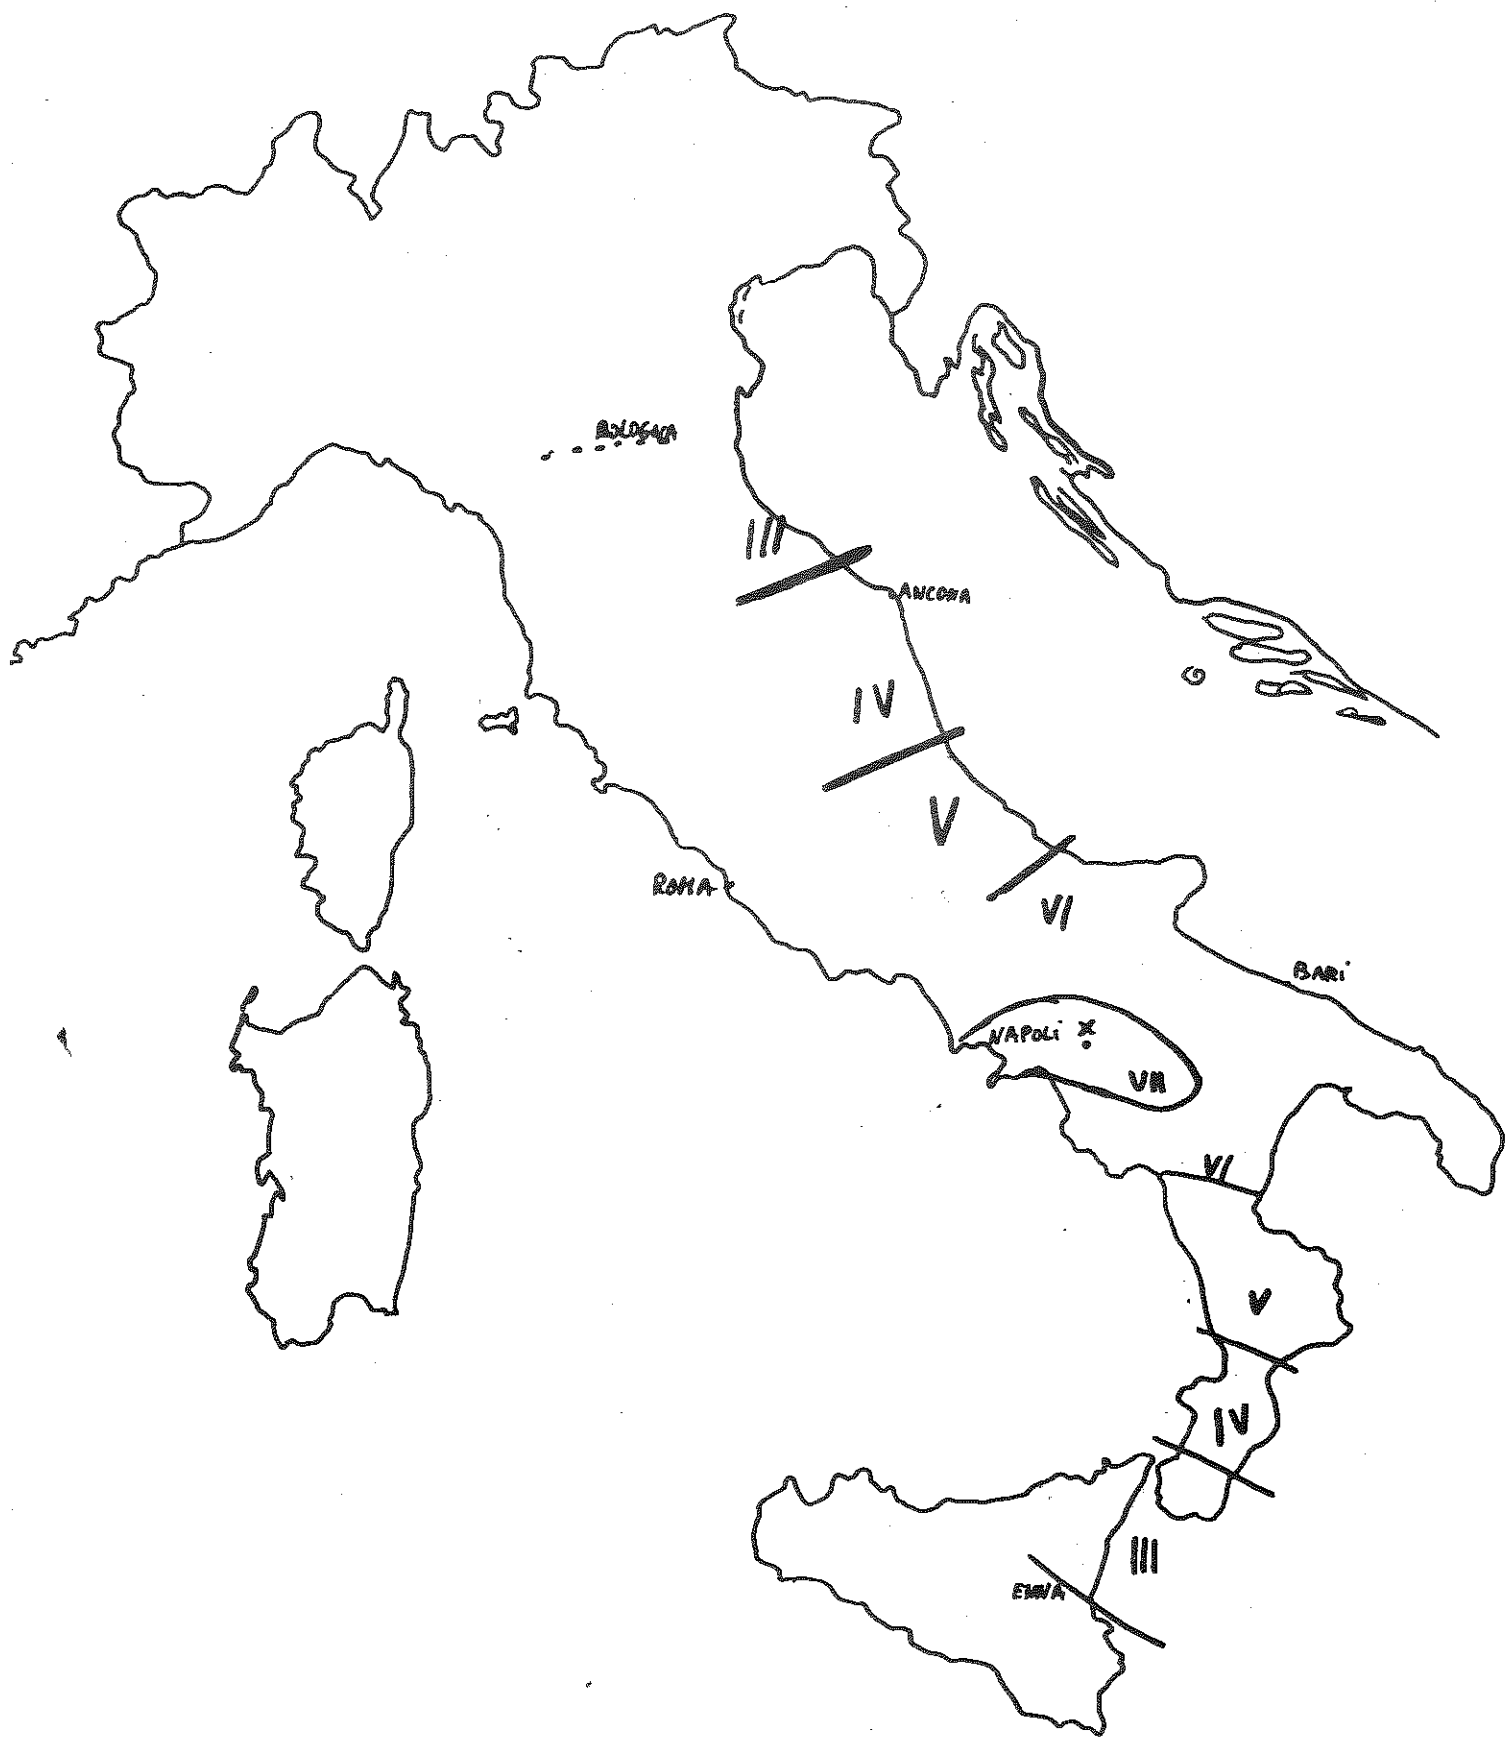

Fig. 1

La figura 1 fornisce un quadro di insieme di queste prime conclusioni.

Per quanto riguarda il censimento delle aree esterne, è inoltre in corso di organizzazione la distribuzione di un nuovo questionario indirizzato questa volta agli insegnanti di scienze delle scuole medie e medie superiori. Tale questionario (fig.2) si compone di 34 domande organizzate in modo tale da permettere poi la applicazione di modelli statistici già sperimentati nel settore specifico (Husebye et al.,1978).

La scelta delle scuole come momento di raccolta e di sintesi delle informazioni macrosismiche, deriva dalla esigenza più volte espressa nell'ambito del progetto di rendere la base sociale partecipe della ricerca, stimolando in questo modo una crescita culturale di massa sul problema terremoto.

IV Fase - Completata la fase di raccolta e di revisione dei dati si prevede una ultima fase per la elaborazione e le interpretazioni finali.

A questo proposito in una recente riunione, tenuta a Napoli, del "Gruppo Catalogo dei Terremoti" si è stabilito di mantenere a Napoli la sede di coordinamento nei vari settori di intervento che sono stati individuati in :

- 1- Classificazione degli effetti locali
- 2- Sismicità storica e atlante delle isosiste
- 3- Modellazione della sorgente e attenuazione

Nel corso di una riunione ristretta del "Gruppo Catalogo" tenuta in seguito a Roma si è inoltre deciso che il gruppo di ricercatori del Progetto che attualmente opera nel settore osservazioni non strumentali presso l'Osservatorio Vesuviano esprima al suo interno dei responsabili di settore che coordineranno tutti i ricercatori del progetto che vorranno utilizzare i dati



CONSIGLIO NAZIONALE DELLE RICERCHE  
PROGETTO FINALIZZATO GEODINAMICA

QUESTIONARIO MACROSISMICO RIDOTTO  
VERSIONE PER LE SCUOLE.

TERREMOTO DEL 23/11/1980 ORE 19,35

LOCALITA' \_\_\_\_\_ LAT. \_\_\_\_\_ ° \_\_\_\_\_ ' LONG. \_\_\_\_\_ ° \_\_\_\_\_ ' QUOTA \_\_\_\_\_ m.

|                        |         |                          |                          |                          |                          |                          |
|------------------------|---------|--------------------------|--------------------------|--------------------------|--------------------------|--------------------------|
| Situazione morfologica |         | CULMINE                  | CRESTA                   | MEZZACOSTA               | FONDOVALLE               | COLLINA                  |
| Natura del substrato   | Rigido  | <input type="checkbox"/> |
|                        | Sciolto | <input type="checkbox"/> |

A cura del Progetto

SI NO

A EFFETTI SULLE PERSONE

- |     |    |                                                                                |       |
|-----|----|--------------------------------------------------------------------------------|-------|
| 0 0 | 1  | E' stato avvertito il terremoto?                                               | _____ |
| 0 0 | 2  | E' stato avvertito da pochi?                                                   | _____ |
| 0 0 | 3  | E' stato avvertito da molti in casa?                                           | _____ |
| 0 0 | 4  | E' stato avvertito da tutti in casa?                                           | _____ |
| 0 0 | 5  | E' stato avvertito fuori casa?                                                 | _____ |
| 0 0 | 6  | E' stato avvertito fuori casa da più di una persona?                           | _____ |
| 0 0 | 7  | E' stato avvertito da molti fuori casa?                                        | _____ |
| 0 0 | 8  | E' stato avvertito come leggero tremore?                                       | _____ |
| 0 0 | 9  | Le vibrazioni erano simili a quelle prodotte dal passaggio di un camion/treno? | _____ |
| 0 0 | 10 | Persone che dormivano sono state risvegliate?                                  | _____ |
| 0 0 | 11 | E' stato difficile mantenere l'equilibrio?                                     | _____ |
| 0 0 | 12 | La gente si è spaventata e/o scappata fuori casa?                              | _____ |
| 0 0 | 13 | C'è stata tendenza al panico?                                                  | _____ |

B EFFETTI SUGLI OGGETTI

- |     |    |                                                             |       |
|-----|----|-------------------------------------------------------------|-------|
| 0 0 | 14 | Hanno tremato i vetri delle finestre?                       | _____ |
| 0 0 | 15 | Hanno oscillato lampadari o oggetti sospesi?                | _____ |
| 0 0 | 16 | Hanno scricchiolato pavimenti o muri?                       | _____ |
| 0 0 | 17 | Hanno vibrato mobili?                                       | _____ |
| 0 0 | 18 | Si sono spostati i quadri sui muri?                         | _____ |
| 0 0 | 19 | Si sono fermati orologi a pendolo?                          | _____ |
| 0 0 | 20 | Sono stati spostati o rovesciati oggetti piccoli e leggeri? | _____ |
| 0 0 | 21 | Si sono aperte o chiuse porte o imposte?                    | _____ |
| 0 0 | 22 | Sono caduti libri dagli scaffali?                           | _____ |
| 0 0 | 23 | Sono stati spostati mobili pesanti?                         | _____ |
| 0 0 | 24 | Sono state osservate onde in stagni o in altri serbatoi di  | _____ |

C DANNI E DISTRUZIONI

- |     |    |                                                                  |       |
|-----|----|------------------------------------------------------------------|-------|
| 0 0 | 25 | Si sono rotti oggetti di vetro o porcellana?                     | _____ |
| 0 0 | 26 | Sono stati danneggiati mobili?                                   | _____ |
| 0 0 | 27 | Sono stati osservati piccoli danni alle case?                    | _____ |
| 0 0 | 28 | Sono stati osservati maggiori danni ad intonaci?                 | _____ |
| 0 0 | 29 | Sono stati osservati danni alle strade?(fratture in superficie?) | _____ |
| 0 0 | 30 | Sono stati osservati danni alle condutture dell'acqua?           | _____ |
| 0 0 | 31 | Sono stati spezzati rami di alberi?                              | _____ |
| 0 0 | 32 | Sono crollati camini?                                            | _____ |
| 0 0 | 33 | Ci sono stati grossi danni alle costruzioni?                     | _____ |
| 0 0 | 34 | Sono stati osservati smottamenti o spaccature nel terreno?       | _____ |

raccolti, per elaborazioni particolari in uno dei settori specifici.

## 2 - LA SCHEDA DI RILEVAMENTO E LA CLASSIFICAZIONE IN TERMINI DI INTENSITA'

La necessità di garantire un prodotto omogeneo come risultato del lavoro di indagine di un elevato numero di squadre di rilievo ha richiesto la definizione di una scheda di rilevamento.

La scheda di rilevamento (fig.3) è stata orientata alla raccolta di pochi parametri relativi agli effetti sulle costruzioni, sull'ambiente e sulle persone.

La scheda deriva dall'analisi di schede già disponibili e già sperimentate (vedi scheda ING) che si è ritenuto necessario integrare con parametri riguardanti la situazione morfologica e la natura del substrato.

In pratica come già verificato in altre occasioni si sono notati spesso effetti di amplificazione attribuibili alla particolare situazione morfologica, che è stata da noi ricondotta a quattro possibili situazioni: posizione di culmine, di cresta, mezza costa e fondo valle.

Per quanto riguarda la natura del substrato si riteneva sufficiente la sola distinzione in substrato rigido e sciolto. L'esperienza condotta ci ha comunque convinto della necessità di una estensione della parametrizzazione relativa.

Per quanto riguarda le costruzioni queste sono state suddivise in quattro tipi: A, B, C, D, secondo la classificazione adottata dall'Istituto Nazionale di Geofisica.

- A) In pietra grezza, mattoni cotti legati con malte povere, vecchie mal ristrutturati con soffitti camorcanne o a travature in legno (scadenti)
- B) in pietra squadrata, mattoni comuni, legati con buone malte o in legno con soffitti a travatura in ferro (mediocri)

CONSIGLIO NAZIONALE DELLE RICERCHE  
PROGETTO FINALIZZATO GEODINAMICA

TERREMOTO DEL \_\_\_\_\_

LOCALITA' \_\_\_\_\_ QUOTA \_\_\_\_\_

SITUAZIONE MORFOLOGICA

|                      |                     |                          |                          |
|----------------------|---------------------|--------------------------|--------------------------|
| Posizione di culmine | Posizione di cresta | Posizione di mezza costa | Posizione di fondo valle |
|----------------------|---------------------|--------------------------|--------------------------|

MATERIA DEL SUBSTRATO

|         |  |  |  |
|---------|--|--|--|
| Rigido  |  |  |  |
| Sciolti |  |  |  |

PAIDA PLEATICA

|             |  |
|-------------|--|
| PROFONDITA' |  |
|-------------|--|

EFFETTI SULLE COSTRUZIONI (In percentuale)

|                                 | A | B | C | D | DESCRIZIONE GENERALE |
|---------------------------------|---|---|---|---|----------------------|
| Crollo totale                   |   |   |   |   |                      |
| Crollo parziale                 |   |   |   |   |                      |
| Lesioni                         |   |   |   |   |                      |
| Profonde                        |   |   |   |   |                      |
| Superficiali                    |   |   |   |   |                      |
| A croce                         |   |   |   |   |                      |
| Caduta di intonaco o calcinacci |   |   |   |   |                      |
| Altezza media (n° di piani)     |   |   |   |   |                      |
| Direzione prevalente di caduta  |   |   |   |   |                      |
| Caduta Lesioni                  |   |   |   |   |                      |
| gravi                           |   |   |   |   |                      |
| leggere                         |   |   |   |   |                      |
| Rotazione                       |   |   |   |   |                      |
| Climdere e torri                |   |   |   |   |                      |
| Monumenti e statue              |   |   |   |   |                      |
| Muri a secco                    |   |   |   |   |                      |
| Ponti                           |   |   |   |   |                      |
| Serbatoi                        |   |   |   |   |                      |
| Direzione prevalente di caduta  |   |   |   |   |                      |
| Deformazioni leggere            |   |   |   |   |                      |
| Deformazioni gravi              |   |   |   |   |                      |
| Binari                          |   |   |   |   |                      |
| Condutture gas e acqua          |   |   |   |   |                      |
| Stazioni                        |   |   |   |   |                      |

EFFETTI SULL'AMBIENTE

Fessurazioni Superficiali Profonde Piccole Grandi Intero

|                                      |  |  |  |  |
|--------------------------------------|--|--|--|--|
| Strade asfaltate                     |  |  |  |  |
| Strade pavimentate                   |  |  |  |  |
| Mal terreno                          |  |  |  |  |
| Avallamenti del manto stradale       |  |  |  |  |
| Distacco e caduta di massi           |  |  |  |  |
| Smottamenti                          |  |  |  |  |
| Frane                                |  |  |  |  |
| Direzione prevalente delle fessure   |  |  |  |  |
| Sospetto di fenomeni di liquefazione |  |  |  |  |

ACQUE

Variazioni di livello +/-

|                                                       |  |  |  |  |
|-------------------------------------------------------|--|--|--|--|
| Sorgenti Pozzi Fontane Torrenti Fiumi Falde Invariato |  |  |  |  |
|-------------------------------------------------------|--|--|--|--|

Variazioni di temperatura +/-

|  |  |  |  |  |
|--|--|--|--|--|
|  |  |  |  |  |
|--|--|--|--|--|

Interbidamento di acque

|  |  |  |  |  |
|--|--|--|--|--|
|  |  |  |  |  |
|--|--|--|--|--|

Straripamento

|  |  |  |  |  |
|--|--|--|--|--|
|  |  |  |  |  |
|--|--|--|--|--|

EFFETTI SULLE COSE

Oscillano

|                       |  |  |  |  |
|-----------------------|--|--|--|--|
| Piano terra superiori |  |  |  |  |
|-----------------------|--|--|--|--|

Oggetti sospesi

|  |  |  |  |  |
|--|--|--|--|--|
|  |  |  |  |  |
|--|--|--|--|--|

Quadri

|  |  |  |  |  |
|--|--|--|--|--|
|  |  |  |  |  |
|--|--|--|--|--|

Liquidi nei recipienti

|  |  |  |  |  |
|--|--|--|--|--|
|  |  |  |  |  |
|--|--|--|--|--|

Piatti e bicchieri

|  |  |  |  |  |
|--|--|--|--|--|
|  |  |  |  |  |
|--|--|--|--|--|

Porte e finestre

|  |  |  |  |  |
|--|--|--|--|--|
|  |  |  |  |  |
|--|--|--|--|--|

Scuotono

|  |  |  |  |  |
|--|--|--|--|--|
|  |  |  |  |  |
|--|--|--|--|--|

Spostamento

|  |  |  |  |  |
|--|--|--|--|--|
|  |  |  |  |  |
|--|--|--|--|--|

Oggetti leggeri

|  |  |  |  |  |
|--|--|--|--|--|
|  |  |  |  |  |
|--|--|--|--|--|

Oggetti pesanti

|  |  |  |  |  |
|--|--|--|--|--|
|  |  |  |  |  |
|--|--|--|--|--|

Attivazione degli allarmi e degli antifurto

|  |  |  |  |  |
|--|--|--|--|--|
|  |  |  |  |  |
|--|--|--|--|--|

EFFETTI SULLE PERSONE

Sensazioni

|                              |  |  |  |  |
|------------------------------|--|--|--|--|
| Pochi Molti Seduti o a letto |  |  |  |  |
|------------------------------|--|--|--|--|

Sentito

|  |  |  |  |  |
|--|--|--|--|--|
|  |  |  |  |  |
|--|--|--|--|--|

Risveglio

|  |  |  |  |  |
|--|--|--|--|--|
|  |  |  |  |  |
|--|--|--|--|--|

Vertigini

|  |  |  |  |  |
|--|--|--|--|--|
|  |  |  |  |  |
|--|--|--|--|--|

Difficoltà di movimento

|  |  |  |  |  |
|--|--|--|--|--|
|  |  |  |  |  |
|--|--|--|--|--|

Paura all'aperto

|  |  |  |  |  |
|--|--|--|--|--|
|  |  |  |  |  |
|--|--|--|--|--|

Prima Durante Dopo

|  |  |  |  |  |
|--|--|--|--|--|
|  |  |  |  |  |
|--|--|--|--|--|

Percezioni auditive

|  |  |  |  |  |
|--|--|--|--|--|
|  |  |  |  |  |
|--|--|--|--|--|

Colpo di vento

|  |  |  |  |  |
|--|--|--|--|--|
|  |  |  |  |  |
|--|--|--|--|--|

Agitazione negli animali

|  |  |  |  |  |
|--|--|--|--|--|
|  |  |  |  |  |
|--|--|--|--|--|

Fenomeni luminosi

|  |  |  |  |  |
|--|--|--|--|--|
|  |  |  |  |  |
|--|--|--|--|--|

Variazioni di quota

|  |  |  |  |  |
|--|--|--|--|--|
|  |  |  |  |  |
|--|--|--|--|--|

- C) in muratura cordolati, ben ristrutturati (quasi buoni)
- D) case in legno ben progettate, in resine, prefabbricati in cemento armato, in legno e mattoni a struttura antisismica (buoni, ottimi)

Il censimento dei danni è stato effettuato in termini percentuali secondo la tipologia di danneggiamento indicata nella scheda di figura 3. Ovviamente la stima della percentuale di danneggiamento dei diversi tipi di costruzione è di tipo qualitativo e non deriva da censimenti puntuali casa per casa.

Per alcuni dei centri da noi visitati sarà poi possibile il confronto delle stime qualitative con dati che derivano invece da un censimento puntuale casa per casa che è stato effettuato dallo S.M. della Difesa in collaborazione con il Progetto.

Per ottenere una classificazione omogenea in termini di intensità delle schede di rilevamento sono state definite alcune schede "tipo" secondo la classificazione MCS e la classificazione MSK. Si è ritenuto di dovere operare la differenziazione suddetta in quanto la fatiscenza del patrimonio edilizio comporta in molti casi situazioni anomale di danneggiamento.

La classificazione omogenea in termini di scala MSK, più orientata alla classificazione dello scuotimento del sito, comporta infatti per molti centri abitati una classificazione discordante con quella che è stata la reale interazione sociale del terremoto.

Si è quindi ritenuto necessario classificare le schede di rilevamento anche in termini di scala MCS utilizzando solo la informazione relativa alle costruzioni di tipo A e di tipo B, ottenendo una immagine che è utilizzabile anche per confronti con gli altri terremoti che hanno interessato in epoca storica l'area in questione.

Per quanto riguarda la classificazione in termini di scala MCS, si sono assunte come soglia le percentuali di danneggiamento elencate in tabella 2.

Tabella n. 2

| I <sub>MCS</sub> | crollo totale | crollo parziale | lesioni profonde |
|------------------|---------------|-----------------|------------------|
| X                | 50            | 75              | -                |
| IX               | 25            | 50              | -                |
| VIII             | 5             | 25              | -                |
| VII              | -             | -               | 50               |

La classificazione in termini di scala MSK è avvenuta invece secondo le soglie elencate in tabella n. 3 e raggruppando in un unico tipo le costruzioni C e D.

Tabella n. 3

| I <sub>MSK</sub> | crollo totale |    |   | crollo parziale |    |    | lesioni profonde |    |    | lesioni superf. |    |    |
|------------------|---------------|----|---|-----------------|----|----|------------------|----|----|-----------------|----|----|
|                  | A             | B  | C | A               | B  | C  | A                | B  | C  | A               | B  | C  |
| X                | 75            | 50 | 5 | -               | -  | 50 | -                | -  | -  | -               | -  | -  |
| IX               | 50            | 5  | - | -               | 50 | 50 | -                | -  | 50 | -               | -  | -  |
| VIII             | -             | -  | - | 75              | -  | -  | -                | 75 | 5  | -               | -  | 75 |
| VII              | -             | -  | - | 5               | -  | -  | 75               | -  | -  | -               | 50 | -  |

Si è quindi provveduto a classificare le schede provenienti dalle varie fasi dei rilievi in termini di scale MSK e MCS.

La classificazione risultante (appendice 1) deve tuttavia essere considerata preliminare, in quanto non è stata discussa nei dettagli con tutti i ricercatori che hanno effettuato i rilievi stessi.

E' da sottolineare inoltre che l'elenco può non essere completo in quanto l'obiettivo era quello di delineare le aree in cui avviene il passaggio da un grado a quello inferiore e questo può avere fatto tralasciare il rilievo di qualche località anche per I  $\geq$  VIII.

I valori di intensità assegnati sono da intendersi livelli di severità degli effetti più che come livelli di severità dello scu-

timento del suolo nei punti cui si riferiscono, in quanto per il momento non è stata effettuata nessuna operazione di filtraggio basata su considerazioni geo-litologiche e morfologiche.

Da una analisi del piano quotato delle intensità, si possono trarre alcune considerazioni di tipo generale sulla distribuzione degli effetti di questo terremoto:

- Si è riscontrata quasi ovunque una forte disomogeneità negli effetti (con presenza simultanea di "sintomi" che porterebbero ad assegnare o a negare la assegnazione di un determinato grado - esempio caratteristico il comportamento dei camini) che rende difficile la stima del grado in una data località, ed il confronto fra località diverse.
- Forte influenza sull'entità dei danneggiamenti hanno probabilmente avuto alcuni effetti cumulativi di trascinamento di edifici costruiti a schiera o addirittura parzialmente sovrapposti. Questo fatto, tipico dei paesi costruiti in posizioni di culmine o di cresta, si è probabilmente sommato ai noti effetti (focalizzazione di energia dovuta alla particolare situazione morfologica).
- L'entità dei danni è stata spesso accentuata anche a causa di particolari condizioni in cui parecchi edifici si trovavano, come età, degrado, sperimentazione di precedenti terremoti ecc.
- L'effetto della normativa nei comuni già inseriti nelle zone dichiarate sismiche sembra aver dato origine a risultati contraddittori. (Ad esempio Aquilonia e S. Angelo dei Lombardi).

Di questa considerazione, così come delle precedenti, occorrerà probabilmente tener conto in sede di revisione delle stime di intensità, per la generalizzazione delle isosisme.

### 3 - TRACCIAMENTO DELLE ISOSISME

La figura 4 fornisce l'interpretazione in termini di isosisme del piano quotato che si riferisce alla classificazione MSK, mentre la figura 5 fornisce la stessa interpretazione secondo la scala MCS.

Il tracciamento preliminare è stato fatto tentando una generalizzazione orientata al filtraggio degli effetti locali e alla evidenziazione del comportamento regionale.

A prescindere dalle variazioni di forma e di estensione che altri criteri di tracciamento, o l'afflusso di nuove informazioni, potranno suggerire, si possono formulare alcune considerazioni che anche se preliminari non potranno che essere confermate.

L'allungamento delle isosisme secondo la direzione appenninica è riscontrato con chiarezza in tutti i gradi, ed è consistente con le ipotesi provenienti dal meccanismo focale preliminare (faglia normale ad orientamento appenninico).

L'espansione dell'area di VIII grado verso la zona circostante avellinese, che per certi versi porterebbe ad individuare due distinte aree di VIII grado, è un altro aspetto caratteristico di questo terremoto. Attualmente non è possibile discriminare fra ipotesi di carattere strutturale (analogie con le strutture che determinano la notevole propagazione dell'intensità nella direzione della penisola sorrentina, che si riscontra anche dall'analisi di terremoti precedenti, o di carattere locale (presenza di tufi e materiali sciolti).

Anche il rafforzamento degli effetti lungo la direttrice Potenza -Matera è probabilmente da interpretare secondo ipotesi del tipo precedente.

La attenuazione più intensa in direzione radiale N-E è spiegabile da diversi fattori concorrenti, quali ad esempio il meccanismo focale (inclinazione della faglia), la presenza della zona vulca-

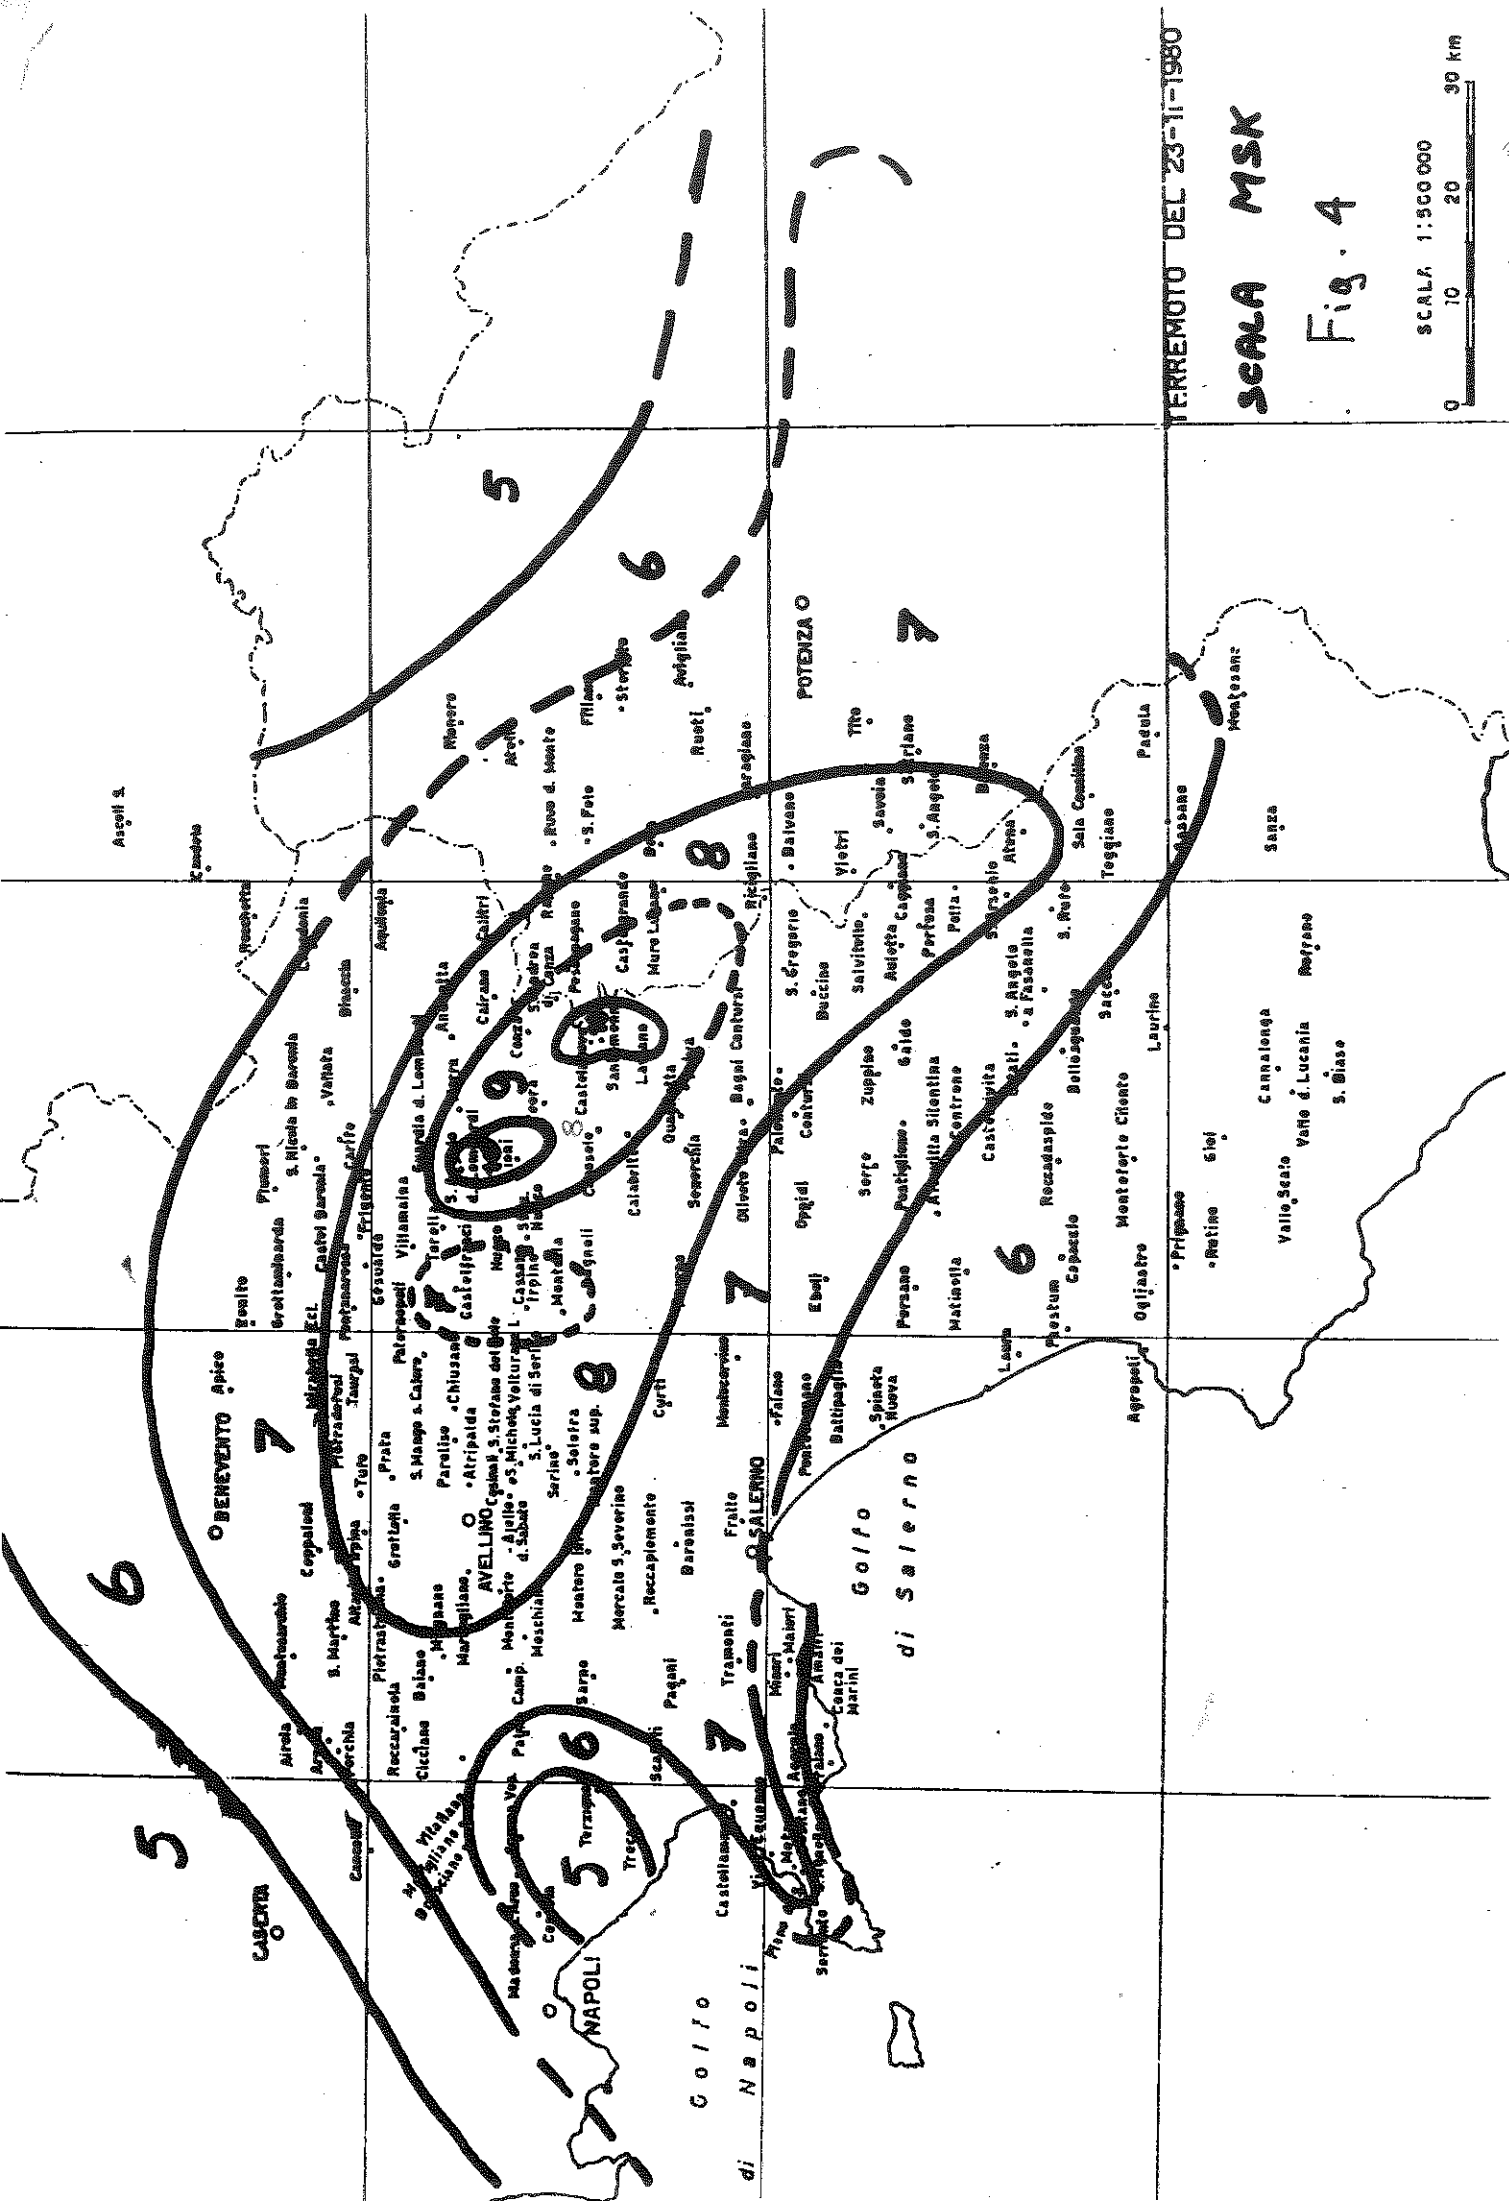

TERREMOTO DEL 23-1-1980

SCALA MSK

Fig. 4

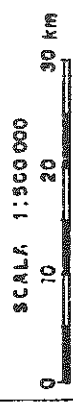



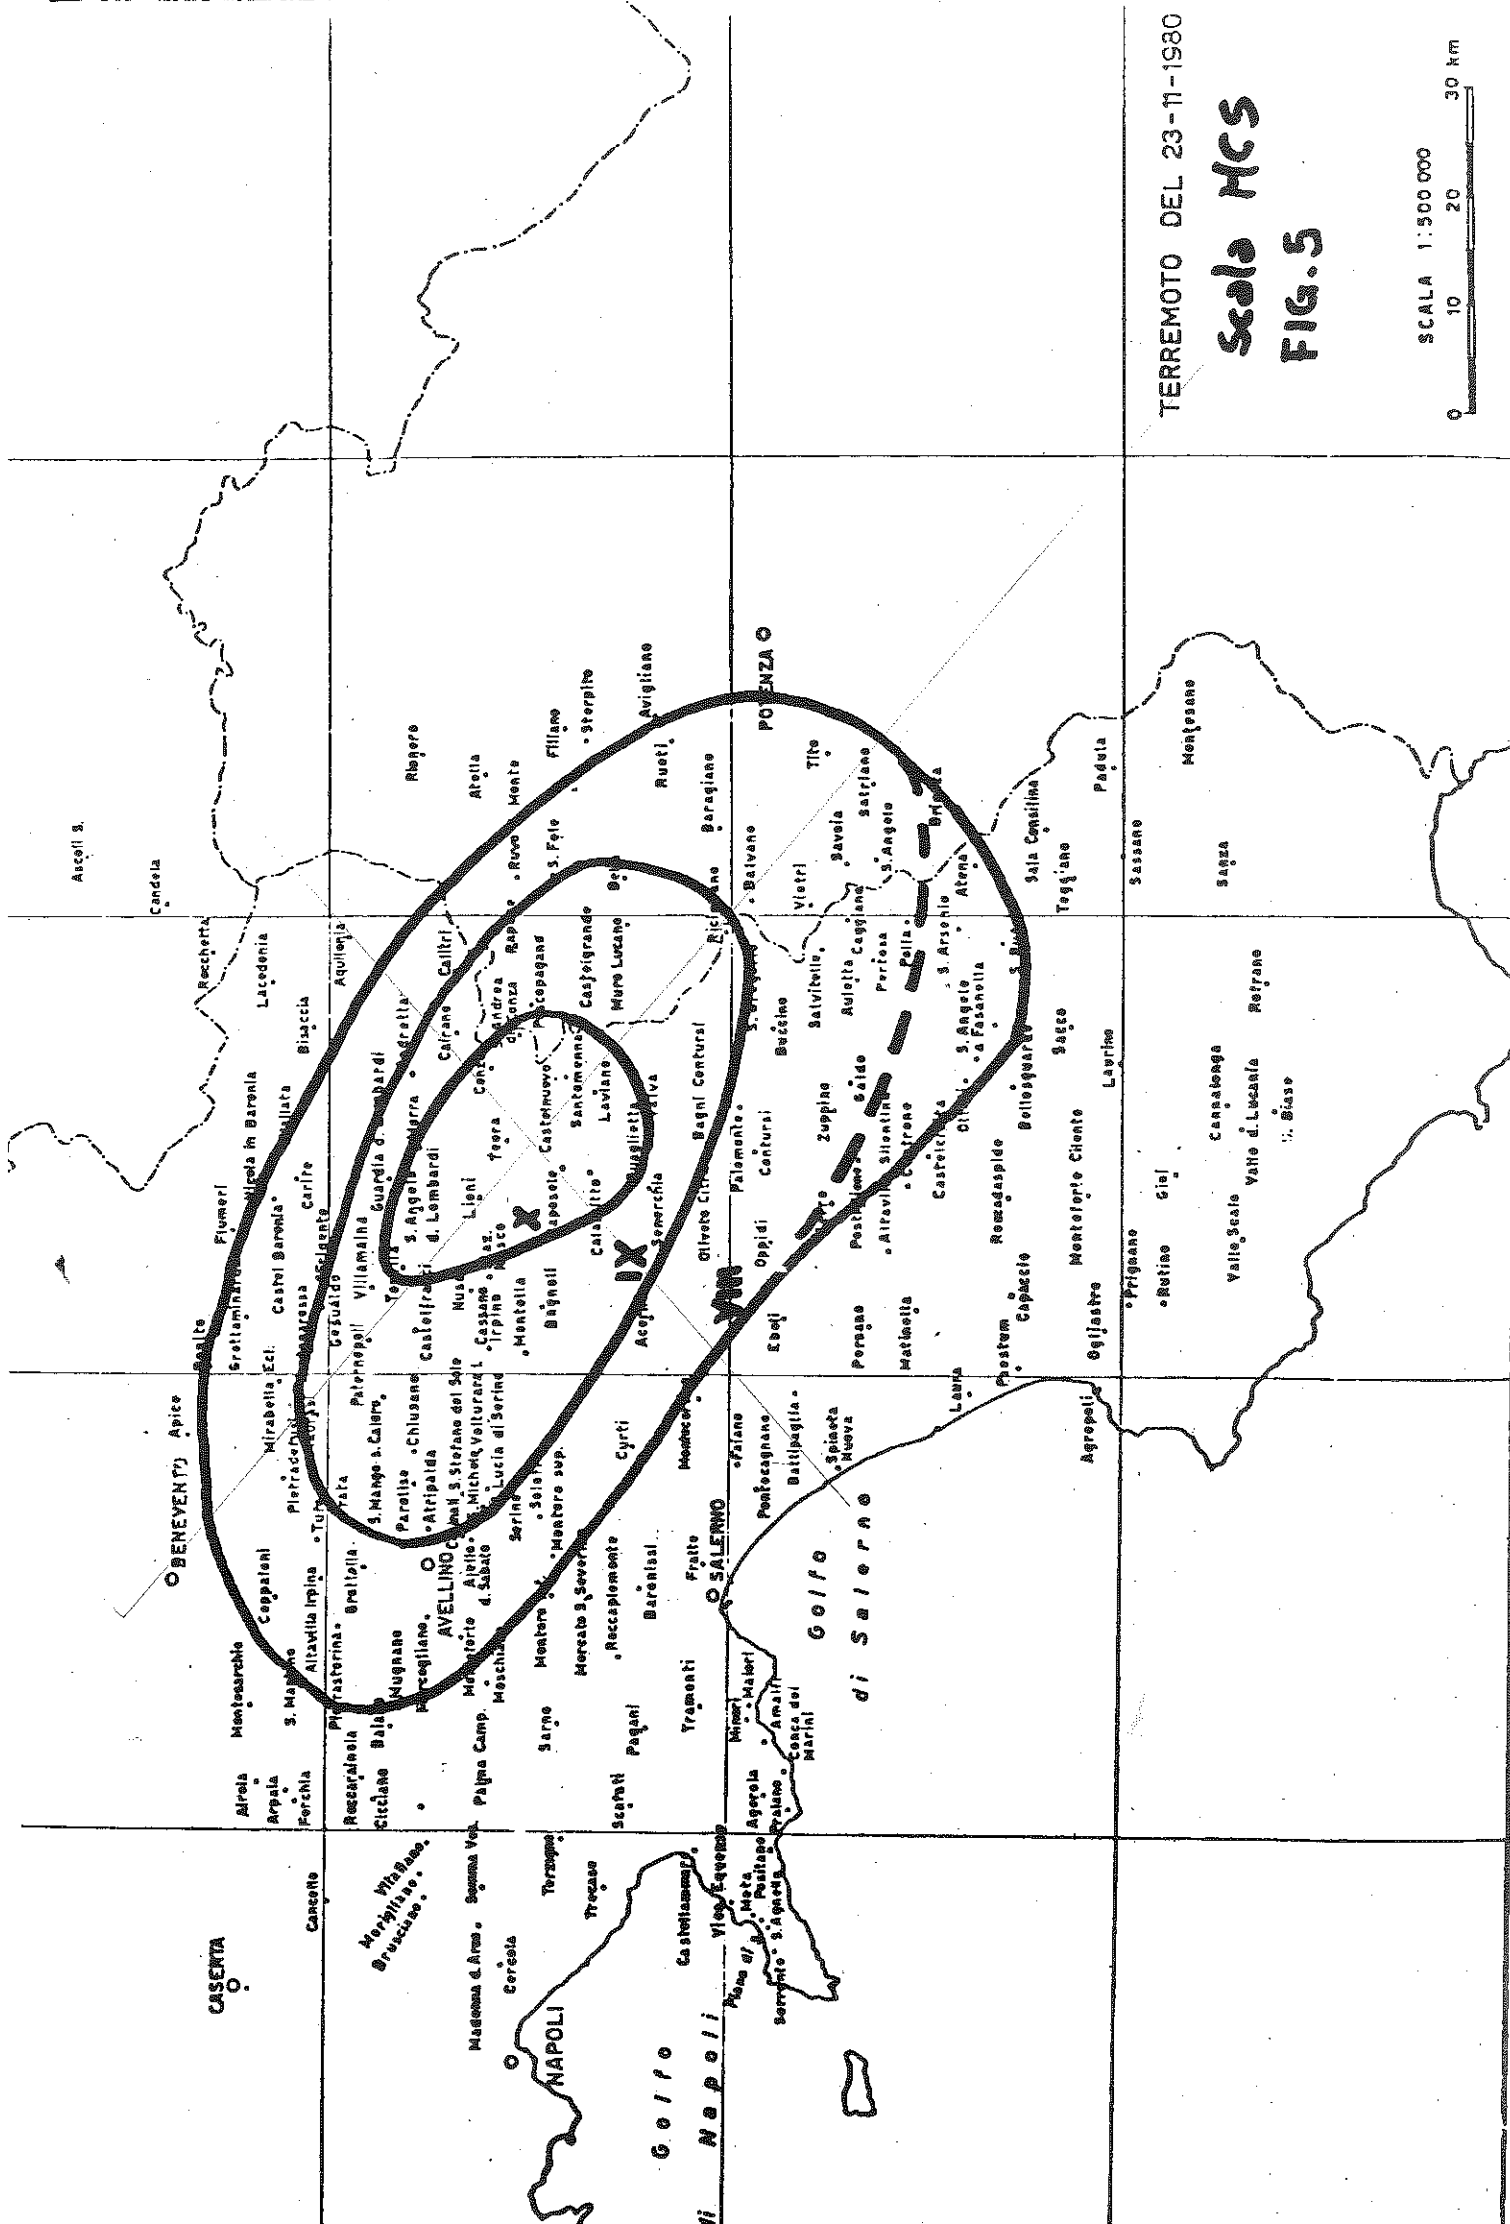

TERREMOTO DEL 23-11-1980  
**Scala MCS**  
**FIG. 5**

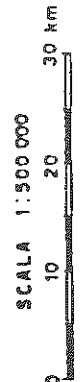

Scala 1:500.000

ca del Vulture e delle strutture fagliate appenniniche.

Il tracciamento proposto è ovviamente anch'esso del tutto preliminare: alcune delle curve sono tratteggiate in quanto tracciate sulla base di dati insufficienti o da rivedere.

Per quanto riguarda l'area di grado X, essa viene attualmente interpretata come composta da due nuclei distinti, cui si riferiscono i calcoli eseguiti nel paragrafo successivo.

L'area di grado IX non è chiusa in direzione S-E per l'impossibilità di reperire informazioni a causa dell'assenza di insediamenti abitati lungo una distanza di più di 15km (da Laviano a Ricigliano).

L'area di VIII grado viene attualmente interpretata come una area, all'interno della quale la zona di Cassano Irpino, Bagnoli, Montella, cui va sicuramente assegnata una intensità più bassa, è da considerarsi come un'anomalia; questa interpretazione è suffragata anche da informazioni provenienti dai rilievi geologici post-terremoto, tuttora in fase di elaborazione.

Il tracciamento di questa area può essere "massimo" o "minimo" a seconda del peso che si vuole assegnare alle località con I=VIII più disperse rispetto al centro. I calcoli che seguono sono stati eseguiti nell'ipotesi di un'area tracciata come "media".

#### 4 - STIMA DEI PARAMETRI FOCALI

Per la stima della profondità si è ricorsi al "modello periferico" di Shebalin(1972). Secondo questo modello le aree di IX e X grado sono considerate come dominate dagli effetti di sorgente e sono da porre in relazione soprattutto alla parte superiore della frattura.

La profondità è stimata attraverso la (1)

$$h = \frac{R_{ei}}{\left[ 10^{2\left(\frac{I_0 - I_1}{\gamma}\right)} - 1 \right]^{1/2}} \quad (1)$$

dove  $R_{ei}$  è il raggio equivalente dell'area della superficie interessata da effetti di intensità  $I_i$  e  $\nu$  è il coefficiente di attenuazione per l'area considerata.

Per quanto riguarda il valore di  $\nu$  sono stati assunti i valori proposti da Shenkareva(1971) e da De Vivo et al.(1979) per l'appennino meridionale.

La tabella 4 fornisce il quadro completo delle varianti di calcolo utilizzate.

Dalla isosisma di IX grado assumendo di 36 e 17 Km le due dimensioni principali si ottiene una lunghezza orizzontale della rottura di 19 Km.; mentre dalla tab. 4 l'estensione verticale  $l_v$  data dalla  $l_v = 1.5(h_n - h_i)$  risulta essere:

$$l_v = 1.5(24 - 5) = 29 \text{ Km}$$

La superficie di rottura può quindi essere assunta di  $542 \text{ Km}^2$  e quindi dalla

$$\log S = M - 3.7 \quad (2)$$

si ha  $M = 6.4$ .

Se si considerano i valori 21 e 6 rispettivamente per  $h_n$  e  $h_i$  si ottiene

$$S = 428 \text{ Km}^2$$

da cui

$$M = 6.3$$

TABELLA N. 4

| I <sub>i</sub> | Area MSK<br>km <sup>2</sup> | Re<br>Km | Area MCS<br>km <sup>2</sup> | Re<br>Km | v = 4.3          |                  | v = 5.1          |                  |
|----------------|-----------------------------|----------|-----------------------------|----------|------------------|------------------|------------------|------------------|
|                |                             |          |                             |          | h <sub>MSK</sub> | h <sub>MCS</sub> | h <sub>MSK</sub> | h <sub>MCS</sub> |
| X'             | 41                          | 3.6      | —                           | —        | 4.9              | —                | 5.5              | —                |
| X''            | —                           | —        | 300                         | 10       | —                | 14.8             | —                | 16.4             |
|                | 50                          | 4.0      | —                           | —        | 5.5              | —                | 6.1              | —                |
| IX             | 600                         | 13.8     | 1.700                       | 23       | 10.0             | 17.2             | 11.4             | 19.2             |
| VIII           | 2.700                       | 29.3     | 3.900                       | 35       | 21.2             | 12.7             | 24.2             | 15.5             |
| VII            | 8.100                       | 50.8     | —                           | —        | 10.4             | —                | 13.5             | —                |

## BIBLIOGRAFIA

- Husebye E.S., F. Ringdal, O. A. Sandvin, A. Cristofferson:  
Statistical test theory in the analysis of macroseismic  
questionnaires. NORSAR Contribution N. 231, 1978.
- De Vivo B., D. Dietrich, I. Guerra, G. Iannaccone, G. Luongo,  
P. Scandone, R. Scarpa, E. Turco: Carta sismotettonica preli-  
minare dell'Appennino Meridionale. CNR, Progetto Finalizzato  
Geodinamica, Pubbl. 166, 1979.
- Shebalin N.V.: Macroscopic data as information on source  
parameters of large earthquake. Phys. Earth. Planet. Interiors,  
6, 316-323, 1972.
- Shenkareva G.A.: Seismicity of Italy. Boll. Geofis. Teor.  
Appl., 13, 271-226, 1971.

## -APPENDICE N° 1

### Elenco dei Comuni su cui è stato effettuato il rilievo macrosismico

La lista che segue suddivide i Comuni in due gruppi. Il primo riporta l'elenco di tutte le località che sono state interessate da effetti classificabili come superiori o uguali all'8° della scala MSK. Il secondo gruppo riporta l'elenco di tutte le località che sono state interessate da effetti classificabili come inferiori all'8° della scala MSK.

La valutazione per ogni località potrebbe essere suscettibile di variazione.

- G R U P P O N° 1 -

|     |                                |    |    |                            |    |    |        |
|-----|--------------------------------|----|----|----------------------------|----|----|--------|
| + ✓ | ACERNO (SA)                    | 1  | 8  | SALVITELLE (SA)            | 50 | 8  |        |
|     | ✓ ALTAVILLA IRPINA (AV)        | 2  | 8  | SAN BIAGIO (AV)            | 51 | 8  |        |
|     | ✓ A TENA LUCANA (SA)           | 3  | 8  | SAN GREGORIO MAGNO (SA)    | 52 | 8  | *      |
|     | ✓ ATRIPALDA (AV)               | 4  | 8  | SAN MANGO SUL CALORE (AV)  | 53 | 8  |        |
|     | ✓ AULETTA (SA)                 | 5  | 8  | SAN MICHELE DI SERINO (AV) | 54 | 8  | *      |
|     | ✓ AVELLINO                     | 6  | 8  | SAN RUFO (SA)              | 55 | 8  |        |
| + ✓ | BALVANO (PZ) ⊖                 | 7  | 8  | SANTA LUCIA DI SERINO (AV) | 56 | 8  |        |
|     | ✓ BARONISSI (SA)               | 8  | 8  | SANT'ANDREA DI CONZA (AV)  | 57 | 9  |        |
| + ✓ | BELLA (PZ) ⊖                   | 9  | 8  | SANT'ANGELO A FASAN. (SA)  | 58 | 8  |        |
|     | ✓ BONITO (AV)                  | 10 | 8  | SANT'ANGELO DEI LOMB. (AV) | 59 | 10 | +      |
|     | ✓ BUCCINO (SA)                 | 11 | 8  | SANT'ARSENIO (SA)          | 60 | 8  |        |
| + ✓ | CAIRANO (AV) ⊖                 | 12 | 8  | SANTOMENNA (SA) ⊖          | 61 | 10 | +      |
| + ✓ | CALABRITTO (AV) ⊖              | 13 | 9  | SENERCHIA (AV) ⊖           | 62 | 8  | +      |
|     | CALITRI (PZ) ⊖ (ito)           | 14 | 9  | SERINO (AV)                | 63 | 8  |        |
|     | ✓ CAMALDOLI (SA)               | 15 | 8  | SERRE (SA)                 | 64 | 8  |        |
| + ✓ | CAPOSELE (AV) ⊖                | 16 | 8  | SOLOFRA (AV) ⊖ (ito)       | 65 | 8  | +      |
|     | ✓ CARIFE (AV)                  | 17 | 8  | SORBO SERPICO (AV)         | 66 | 8  |        |
| + ✓ | CASTELGRANDE (PZ) ⊖            | 18 | 8  | TEORA (AV) ⊖               | 67 | 9  |        |
|     | ✓ CASTELLAMMARE DI ST. (NA)    | 19 | 8  | TITO (PZ) -                | 68 | 8  |        |
| + ✓ | CASTELNUOVO DI CONZA (SA) ⊖    | 20 | 9  | TORELLA DEI LOMBARDI (AV)  | 69 | 8  | (ROMA) |
|     | ✓ CELZI (AV)                   | 21 | 8  | TUFO (AV)                  | 70 | 8  |        |
|     | ✓ CEPPALONI (BN)               | 22 | 8  | VALVA (SA) ⊖               | 71 | 8  | +      |
|     | ✓ COLLIANO (SA) ⊖              | 23 | 8  | VIETRI DI POTENZA (PZ) ⊖   | 72 | 8  | +      |
| + ✓ | CONZA DI CAMPANIA (AV) ⊖       | 24 | 10 | VILLAMAINA (AV) ⊖          | 73 | 8  |        |
|     | ✓ FORCHIA-ARPAIA (BN)          | 25 | 8  | VOLTURARA IRPINA (AV) ⊖    | 74 | 8  |        |
|     | ✓ GIFFONI VALLE PIANA (SA)     | 26 | 8  |                            |    |    |        |
|     | ✓ GUARDIA DEI LOMBARDI (AV) ⊖  | 27 | 8  | CASSANO IRPINO             |    |    |        |
|     | ✓ LACENO (AV)                  | 28 | 8  | CASTELFRANCO               |    |    |        |
| + ✓ | LAVIANO (SA) ⊖                 | 29 | 10 | RNO DEL MONTE              |    |    |        |
| + ✓ | LIONI (AV) ⊖                   | 30 | 10 |                            |    |    |        |
|     | ✓ MATERDOMINI (AV) ⊖           | 31 | 9  | BRIENZA                    |    |    |        |
|     | ✓ MERCOGLIANO (AV)             | 32 | 8  |                            |    |    |        |
|     | ✓ MIRABELLA ECLANO (AV)        | 33 | 8  |                            |    |    |        |
|     | ✓ MONTANO ANTILIA (SA)         | 34 | 8  |                            |    |    |        |
|     | ✓ MONTEFORTE IRPINO (AV)       | 35 | 8  |                            |    |    |        |
|     | ✓ MONTORO SUPERIORE (AV)       | 36 | 8  |                            |    |    |        |
| + ✓ | MORRA DE SANCTIS (AV) ⊖        | 37 | 8  |                            |    |    |        |
|     | ✓ MUGNANO DEL CARDINALE (AV)   | 38 | 8  |                            |    |    |        |
|     | ✓ MURO LUCANO (PZ) ⊖           | 39 | 8  |                            |    |    |        |
|     | ✓ OTTATI (SA)                  | 40 | 8  |                            |    |    |        |
| + ✓ | PESCOPAGANO (PZ) ⊖             | 41 | 9  |                            |    |    |        |
|     | ✓ PIETRA DE FUSI (AV)          | 42 | 8  |                            |    |    |        |
|     | ✓ PIETRASTORNINA (AV)          | 43 | 8  |                            |    |    |        |
|     | ✓ POLLA (SA)                   | 44 | 8  |                            |    |    |        |
|     | ✓ PRATA DI PRINCIPATO UL. (AV) | 45 | 8  |                            |    |    |        |
| + ✓ | QUAGLIETTA (AV) ⊖              | 46 | 8  |                            |    |    |        |
| + ✓ | RICIGLIANO (SA) ⊖              | 47 | 8  |                            |    |    |        |
|     | ✓ ROCCA SAN FELICE (AV) ⊖      | 48 | 8  |                            |    |    |        |
|     | ✓ RUOTI (PZ)                   | 49 | 8  |                            |    |    |        |

- G R U P P O N° 2 -

|                          |   |                            |   |                             |   |
|--------------------------|---|----------------------------|---|-----------------------------|---|
| ABRIOLA (PZ)             | 6 | CASTELCIVITA (SA)          | 6 | GRAVINA DI PUGLIA (BA)      | 5 |
| ACERENZA (PZ)            | 5 | CASTEL FRANCI (AV)         | 7 | GROTTAMINARDA (AV)          | 6 |
| AGEROLA (NA)             | 5 | CASTEL FRANCO IN MISC.(BN) | 7 | GROTTOLE (MT)               | 6 |
| AGROPOLI (SA)            | 6 | CASTELMEZZANO (PZ)         | 5 | GROTTOLELLA (AV)            | 7 |
| AIELLO (SA)              | 6 | CASTEL S.GIORGIO (SA)      | 6 | IRSINA (MT)                 | 5 |
| AIELLO DEL SABATO (AV)   | 6 | CASTEL S.LORENZO (SA)      | 5 | ISCHIA (NA)                 | 5 |
| AIROLA (BN)              | 7 | CASTELVETERE IN V.F.(BN)   | 6 | LACEDONIA (AV)              | 6 |
| ALBERONA (FG)            | 6 | CASTROREGIO (CS)           | 5 | LAGONEGRO (PZ)              | 6 |
| ALTAMURA (BA)            | 5 | CASTROVILLARI (CS)         | 5 | LAURINO (SA)                | 6 |
| ALTAVILLA SILENTINA (SA) | 6 | CAVA DEI TIRRENI (SA)      | 7 | LAURO (AV)                  | 7 |
| AMALFI (SA)              | 6 | CENTOLA (SA)               | 5 | LIVERI (NA)                 | 6 |
| AMENDOLARA MARINA (CS)   | 6 | CERCHIARA (CS)             | 4 | LUNGRO (CS)                 | 4 |
| ANDRETTA (AV)            | 7 | CERCOLA (NA)               | 5 | MADONNA DELL'ARCO (NA)      | 5 |
| ANZANO IN PUGLIA (FG)    | 7 | CERIGNOLA (FG)             | 5 | MAIORI (SA)                 | 6 |
| ANZI (PZ)                | 5 | CERRETO SANNITA (BN)       | 5 | MARCELLINA (CS)             | 4 |
| APICE (BN)               | 7 | CERVINARA (AV)             | 7 | MARIGLIANO (NA)             | 7 |
| APOLLOSA (BN)            | 7 | CESINALI (AV)              | 7 | MATERA                      | 6 |
| AQUILONIA (AV)           | 5 | CETRARO (CS)               | 4 | MELFI (PZ)                  | 6 |
| ARIANO IRPINO (AV)       | 7 | CETRARO MARINA (CS)        | 4 | MERCATO SAN SEVERINO (SA)   | 7 |
| ARPAIA(BN)               | 7 | CHIAROMONTE (PZ)           | 6 | MINERVINO MURGE (BA)        | 5 |
| ASCEA (SA)               | 6 | CHIOUSANO (AV)             | 7 | MINORI (SA)                 | 6 |
| ASCOLI SATTIANO (FG)     | 6 | CITTADELLA DEL CAPO (CS)   | 4 | MOIANO (BN)                 | 6 |
| ATELLA (PZ)              | 7 | CONCA DEI MARINI (SA)      | 6 | MONGRASSANO ST(CS)          | 4 |
| AVERSA (CE)              | 6 | CONTRONE (SA)              | 7 | MONTECALVO IRPINO (AV)      | 7 |
| AVIGLIANO (PZ)           | 6 | CONTURSI (SA)              | 6 | MONTECORVINO PUGL.(SA)      | 7 |
| BACOLI -BAIA (NA)        | 6 | CORLETO MONFORTE (SA)      | 6 | MONTECORVINO ROV. (SA)      | 6 |
| BAGNOLI IRPINO (AV)      | 6 | CORLETO PERTICARA (PZ)     | 7 | MONTE DI PROCIDA (NA)       | 6 |
| BAIANO (AV)              | 7 | DELICETO (FG)              | 6 | MONTELLA (AV)               | 7 |
| BARAGGIANO (PZ)          | 7 | DIAMANTE (CS)              | 5 | MONTE MARANO (AV)           | 7 |
| BARLETTA (BA)            | 5 | DOMICELLE (AV)             | 7 | MONTEMURRO (PZ)             | 7 |
| BELLO SGUARDO (SA)       | 6 | DORIA (CS)                 | 5 | MONTESANO SULLA MARC.(SA)   | 6 |
| BISACCIA (AV)            | 7 | DUGENTA (BN)               | 5 | MONTESARCHIO (BN)           | 6 |
| BISIGNANO (CS)           | 5 | DURAZZANO (BN)             | 6 | MONTORO INFERIORE (AV)      | 6 |
| BORGIO (AV)              | 5 | EBOLI (SA)                 | 7 | NOCERA INF. e SUP. (SA)     | 7 |
| BRACIGLIANO (SA)         | 7 | FILIANO (PZ)               | 7 | NOLA (NA)                   | 6 |
| BRIENZA (PZ)             | 7 | FIRMO (CS)                 | 4 | NOVA SIRI (MT)              | 6 |
| BRUSCIANO (NA)           | 6 | FLUMERI (AV)               | 6 | NUSCO (AV)                  | 7 |
| CAGGIANO (SA)            | 7 | FOGLIANISE (BN)            | 5 | OGLIASTRO CILENTO (SA)      | 6 |
| CALVELLO (PZ)            | 6 | FOGLIANO DI VAL FORT.(BN)  | 6 | OLIVETO CITRA (SA)          | 7 |
| CAMPAGNA (SA)            | 7 | FONTANAROSA (AV)           | 6 | OPPIDI (SA)                 | 6 |
| CAMPORA (SA)             | 5 | FORENZA (PZ)               | 5 | ORDONA (FG)                 | 6 |
| CANDELA (FG)             | 7 | FORINO (AV)                | 7 | ORSARA (FG)                 | 6 |
| CANOSA (FG)              | 6 | FRATTE (SA)                | 6 | PADULA (SA)                 | 7 |
| CAPACCIO (SA)            | 5 | FRIGENTO (AV)              | 6 | PADULI (BN)                 | 7 |
| CAPACCIO - PESTUM (SA)   | 6 | FUTANI (SA)                | 5 | PAGO DEL VALLO DI LAURO(AV) | 6 |
| CASOLA DI DOMICELLE (AV) | 6 | GALDO (SA)                 | 6 | PALMA CAMPANIA (NA)         | 5 |
| CASOLA DI NAPOLI (NA)    | 6 | GESUALDO (AV)              | 6 | PALINURO (SA)               | 5 |
| CASSANO ALLO IONIO (CS)  | 6 | GIOIA DEL COLLE (BA)       | 5 | PALOMONTE (SA)              | 7 |
| CASSANO IRPINO (AV)      | 7 | GRAGNANO (NA)              | 7 | PAOLA (CS)                  | 4 |
| CASTEL BARONIA (AV)      | 6 | GRASSANO (MT)              | 7 | PAOLISI (BN)                | 6 |



|                             |   |                             |   |
|-----------------------------|---|-----------------------------|---|
| PAROLISE (AV)               | 7 | SAN FELICE A CANCELLO(PZ)   | 6 |
| PATERNOPOLI (AV)            | 7 | SANT'ERAMO IN COLLE (BA)    | 5 |
| PERSANO (AV)                | 5 | SANTO STEFANO DEL SOLE (AV) | 7 |
| PESCOSANNITA (BN)           | 6 | SAN VITALIANO (NA)          | 7 |
| PIANO DI SORRENTO (NA)      | 7 | SANZA (SA)                  | 6 |
| PIETRAGALLA (PZ)            | 5 | SARNO (SA)                  | 6 |
| PIGNOLA (PZ)                | 7 | SASSANO (SA)                | 7 |
| PISCIOTTA (SA)              | 5 | SATRIANO DI LUCANIA (PZ)    | 6 |
| POLICORO (MT)               | 6 | SAVIANO (NA)                | 6 |
| POMIGLIANO D'ARCO (NA)      | 7 | SAVOIA DI LUCANIA (PZ)      | 7 |
| POMPEI (NA)                 | 6 | SCAFATI (SA)                | 6 |
| PONTECAGNANO (SA)           | 7 | SCALEA (CS)                 | 4 |
| PONTELANDOLFO (BN)          | 6 | SCIASCIANO (NA)             | 6 |
| POSITANO (SA)               | 5 | SCORZO e ZUPPINO (SA)       | 7 |
| POSTIGLIONE (SA)            | 7 | SENISE (PZ)                 | 6 |
| POTENZA e PZ scalo          | 7 | SERRADARCE (SA)             | 7 |
| POZZUOLI (NA)               | 6 | SIANO (SA)                  | 7 |
| PRAIANO (SA)                | 5 | SIBARI (CS)                 | 4 |
| PRIGNANO CILENTO (SA)       | 6 | SICIGNANO ALBURNI (SA)      | 6 |
| PROCIDA (NA)                | 6 | SOLOPACA (BN)               | 5 |
| QUINDICI (SA)               | 6 | SOMMA VESUVIANA (NA)        | 5 |
| RAPONE (PZ)                 | 7 | SORRENTO (NA)               | 6 |
| RIONERO in VULTURE (PZ)     | 7 | SPINAZZOLA (BA)             | 5 |
| RIPA CANDIDA (PZ)           | 6 | STERPITO (PZ)               | 6 |
| ROCCADASPIDE (PZ)           | 6 | STRIANO (NA)                | 6 |
| ROCCARAINOLA (NA)           | 6 | TARSIA (CS)                 | 4 |
| ROCCHETTA S. ANTONIO (FG)   | 6 | TAURASI (AV)                | 7 |
| ROFRANO (SA)                | 6 | TEGGIANO (SA)               | 7 |
| ROSCIGNO (SA)               | 6 | TERZIGNO (NA)               | 5 |
| ROTONDELLA (MT)             | 6 | TOCCO CAUDIO (BN)           | 7 |
| ROTONDI (AV)                | 7 | TOLVE (PZ)                  | 5 |
| RUTINO (SA)                 | 6 | TORELLO (SA)                | 6 |
| RUVO DEL MONTE (PZ)         | 7 | TORRECUSO (BN)              | 5 |
| RUVO DI PUGLIA (BA)         | 6 | TRAMONTI (SA)               | 7 |
| SALA CONSILINA (SA)         | 7 | TREBISACCE (CS)             | 5 |
| SALSA IRPINA (AV)           | 7 | TRECASE (NA)                | 7 |
| SAN BIASE (SA)              | 6 | TREVICO (AV)                | 7 |
| SAN FELE (PZ)               | 7 | TRICARICO (MT)              | 7 |
| SAN FILI (CS)               | 4 | TRIVIGNO (PZ)               | 7 |
| SAN GIORGIO LA MOLARA(BN)   | 6 | VAGLIO BASILICATA (PZ)      | 5 |
| SAN MARTINO VALLE CAUD.(BN) | 6 | VALLATA (AV)                | 7 |
| SAN NICOLA ARCELLA (CS)     | 4 | VALLO LUCANIA (SA)          | 6 |
| SAN NICOLA BARONIA (AV)     | 7 | VALLO LUCANIA scalo (SA)    | 6 |
| SAN POTITO (AV)             | 7 | VALSINNI (MT)               | 6 |
| SANT'AGATA DE' GOTI (BN)    | 6 | VICO EQUENSE (NA)           | 7 |
| SANT'AGNELLO (NA)           | 7 | VILLA D'AGRI (PZ)           | 5 |
| SANTA MARIA CAPUA VET.(CE)  | 5 |                             |   |
| SANT'ANGELO LE FRATTE (PZ)  | 7 |                             |   |
| SANT'ARCANGELO (PZ)         | 6 |                             |   |

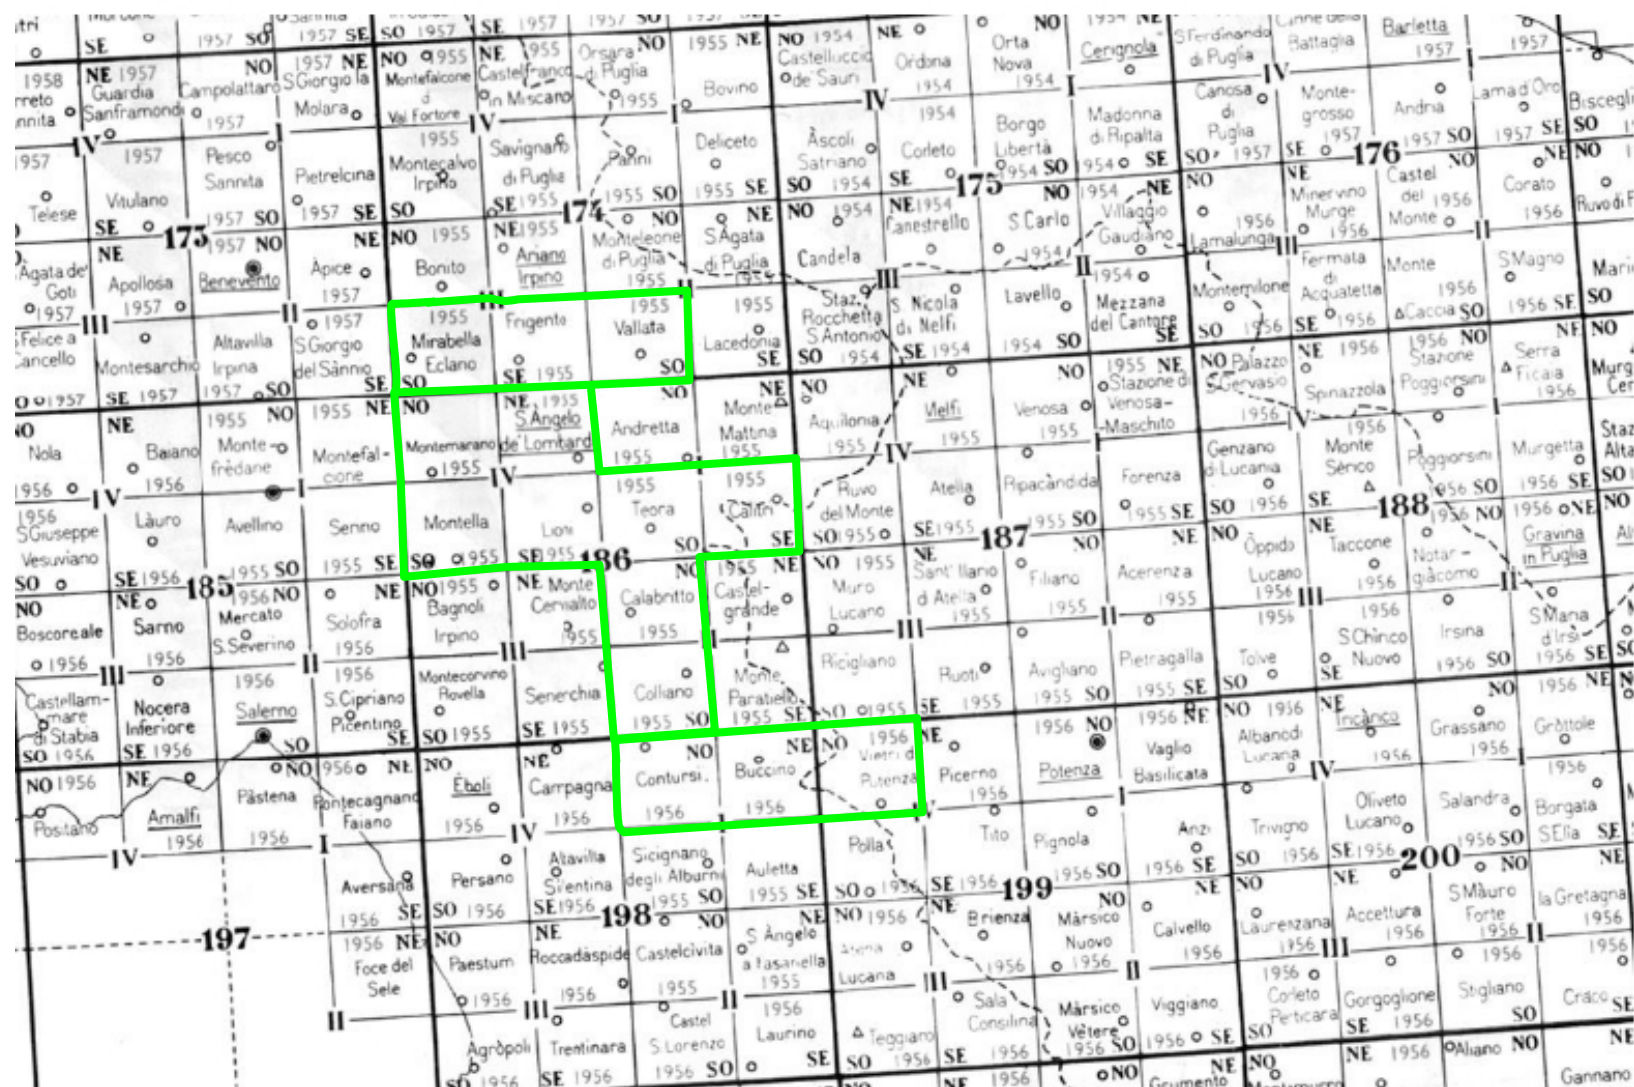



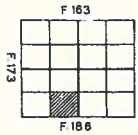

Frigento

F° 174 della Carta d'Italia

FRIGENTO

Longitudine Est dal meridiano di Roma (Monte Mari)

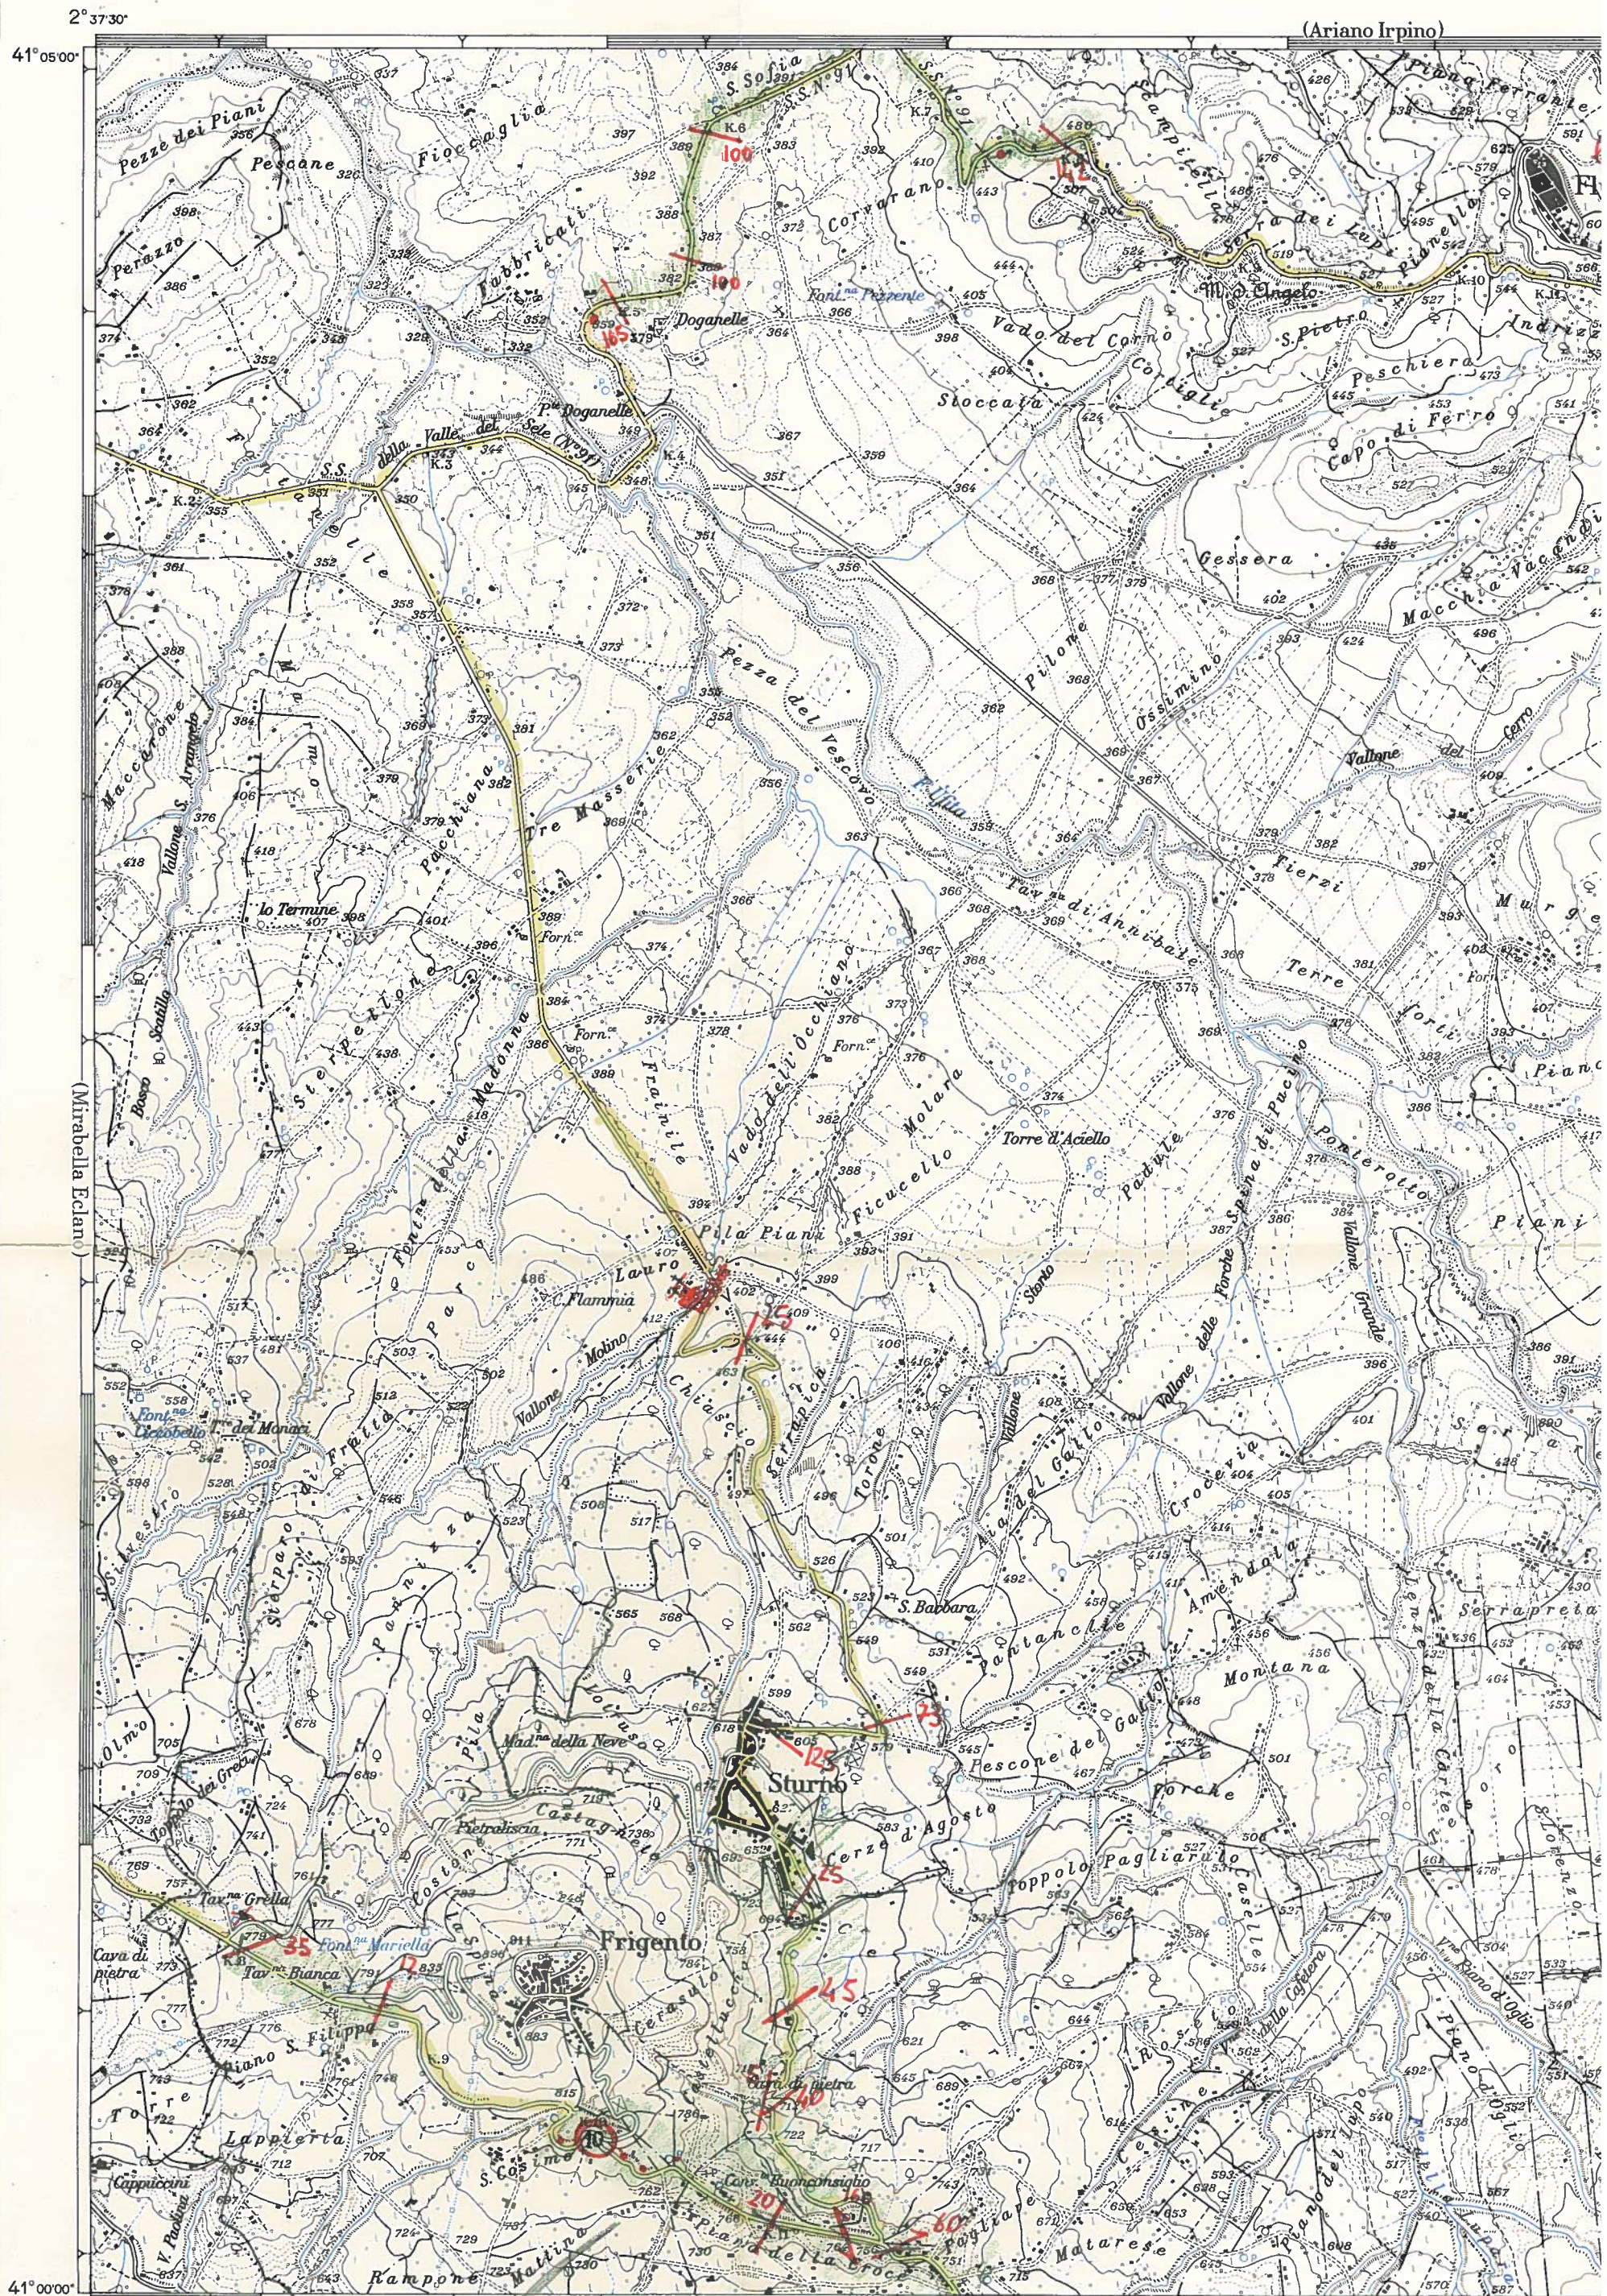



Le coordinate geografiche sono riferite all'Ellissoide  
Internazionale orientato a Roma (M. Mario)

III S. E.

2° 45'00"

41° 05'00"

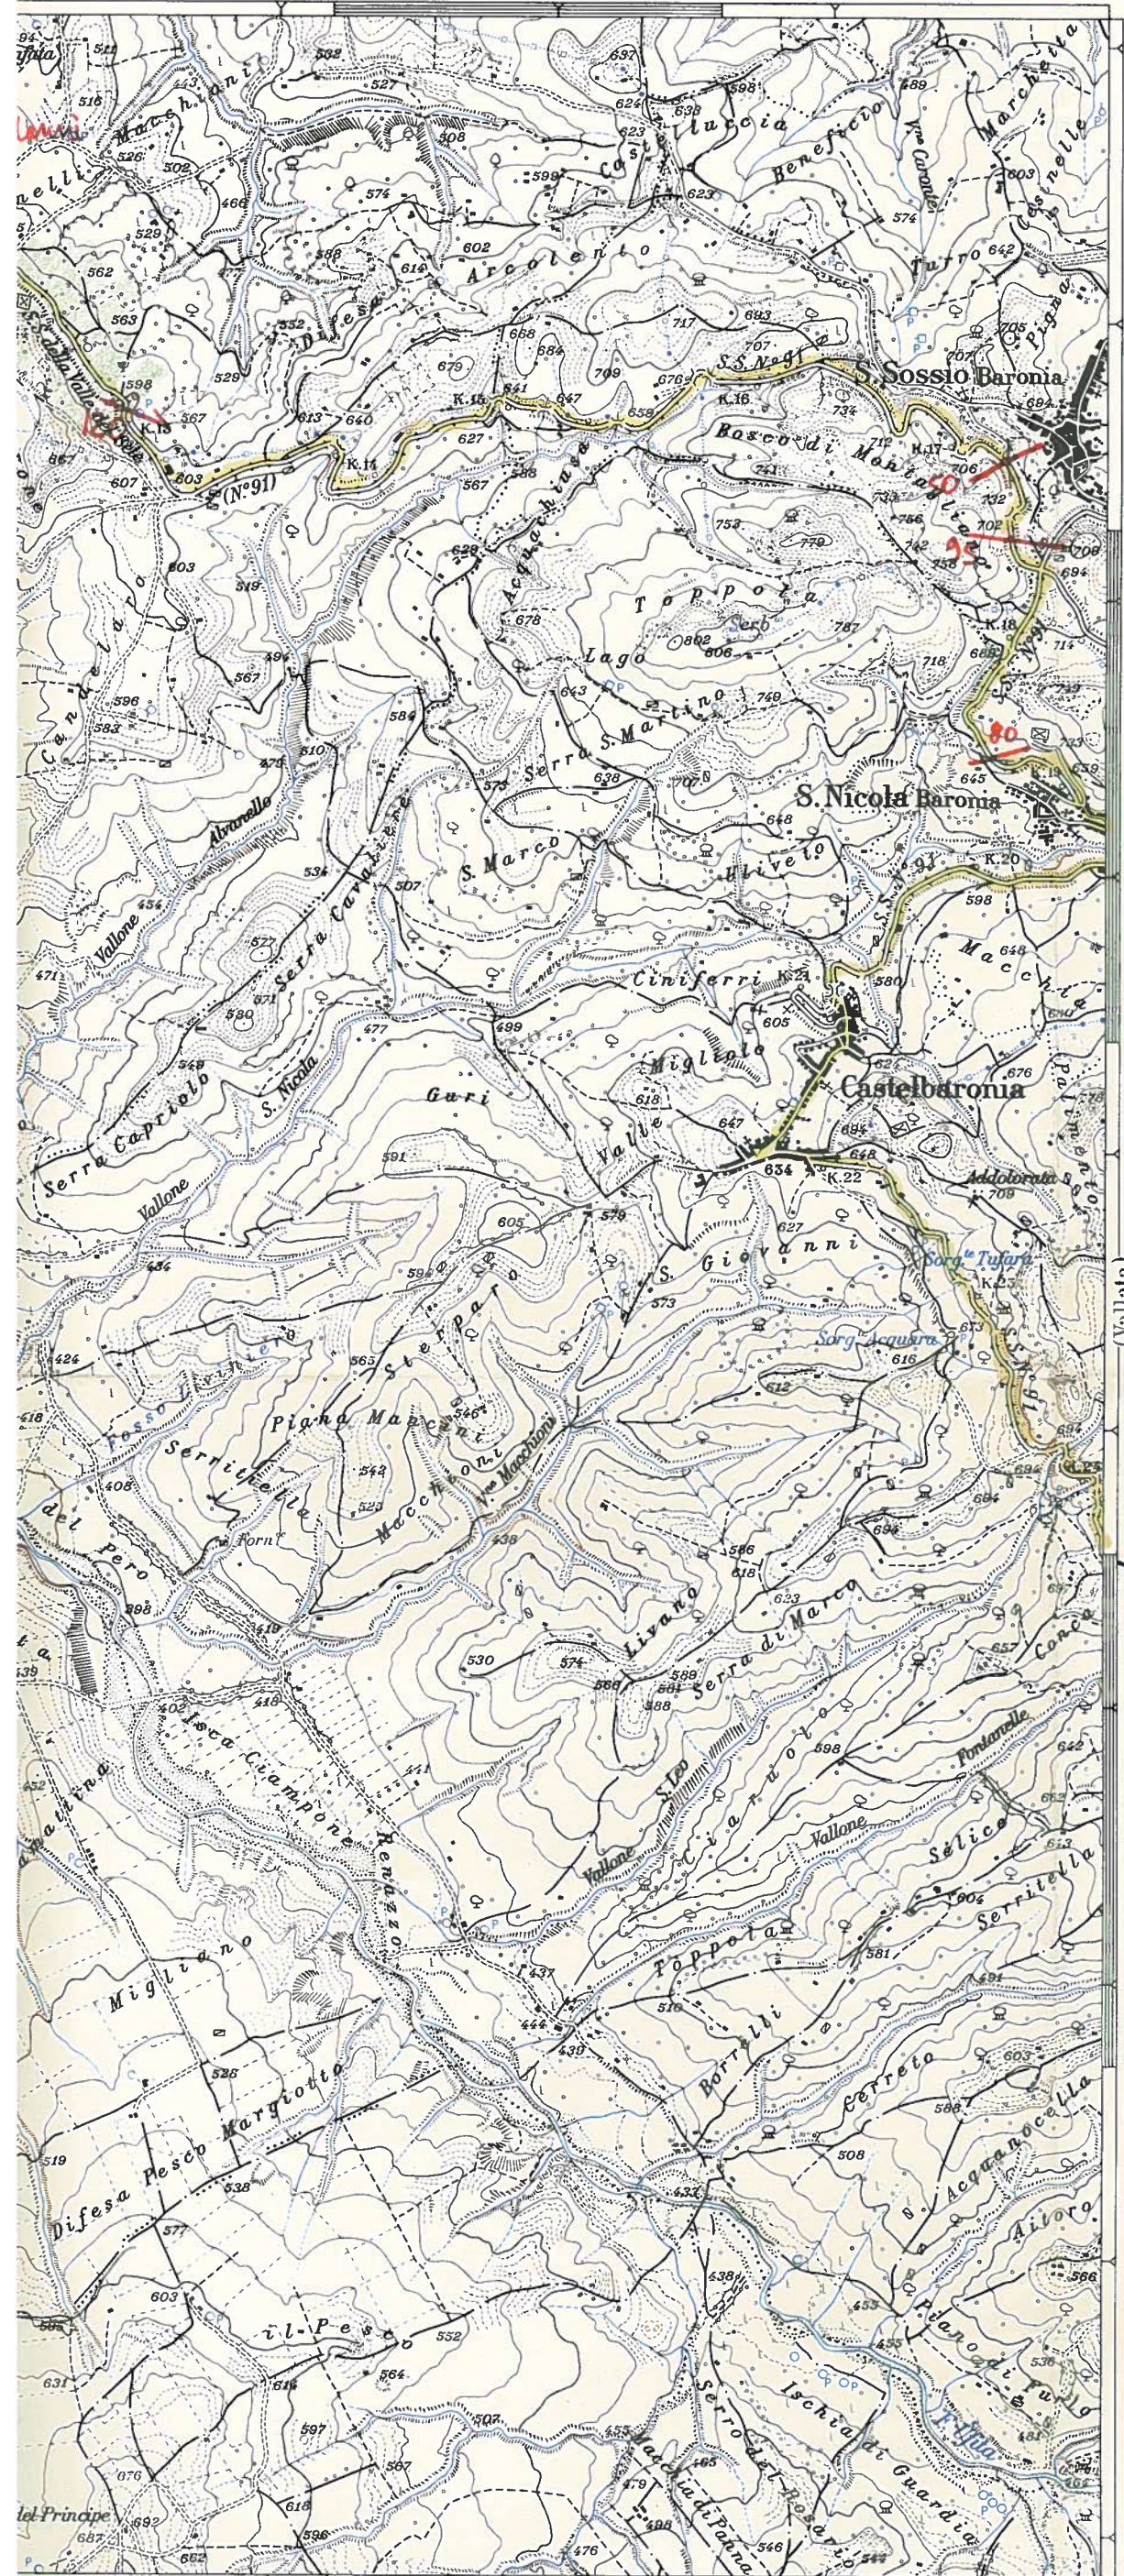

(Vallata)

Seppia SS 91 fino alla Tal. Anthea (c. m. 1000 m. s.l.m.)  
Sotto la quale si trova la valle e sotto la quale si trova la  
valle. Il fiume Vallata e la valle sono ben visibili.

Le coordinate dei vertici di questa carta nel reticolato italiano (proiezione Gauss-Boaga, ellissoide internazionale, orientamento a M. Mario 1940) sono le seguenti:

FUSO EST

|       |                            |       |                            |
|-------|----------------------------|-------|----------------------------|
| N. O. | E = 2526496<br>N = 4548090 | N. E. | E = 2536996<br>N = 4548107 |
| S. O. | E = 2526504<br>N = 4538839 | S. E. | E = 2537017<br>N = 4538856 |

Nelle carte sulle quali è stato tracciato il reticolato italiano, questo è indicato nella cornice con i seguenti segni convenzionali: fuso est — fuso ovest —

24 Frig. 1940



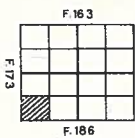

Mirabella Eclano

# F.174 della Carta d'Italia

# MIRABELLA ECI

Longitudine Est dal meridiano di Roma (Monte Mario)

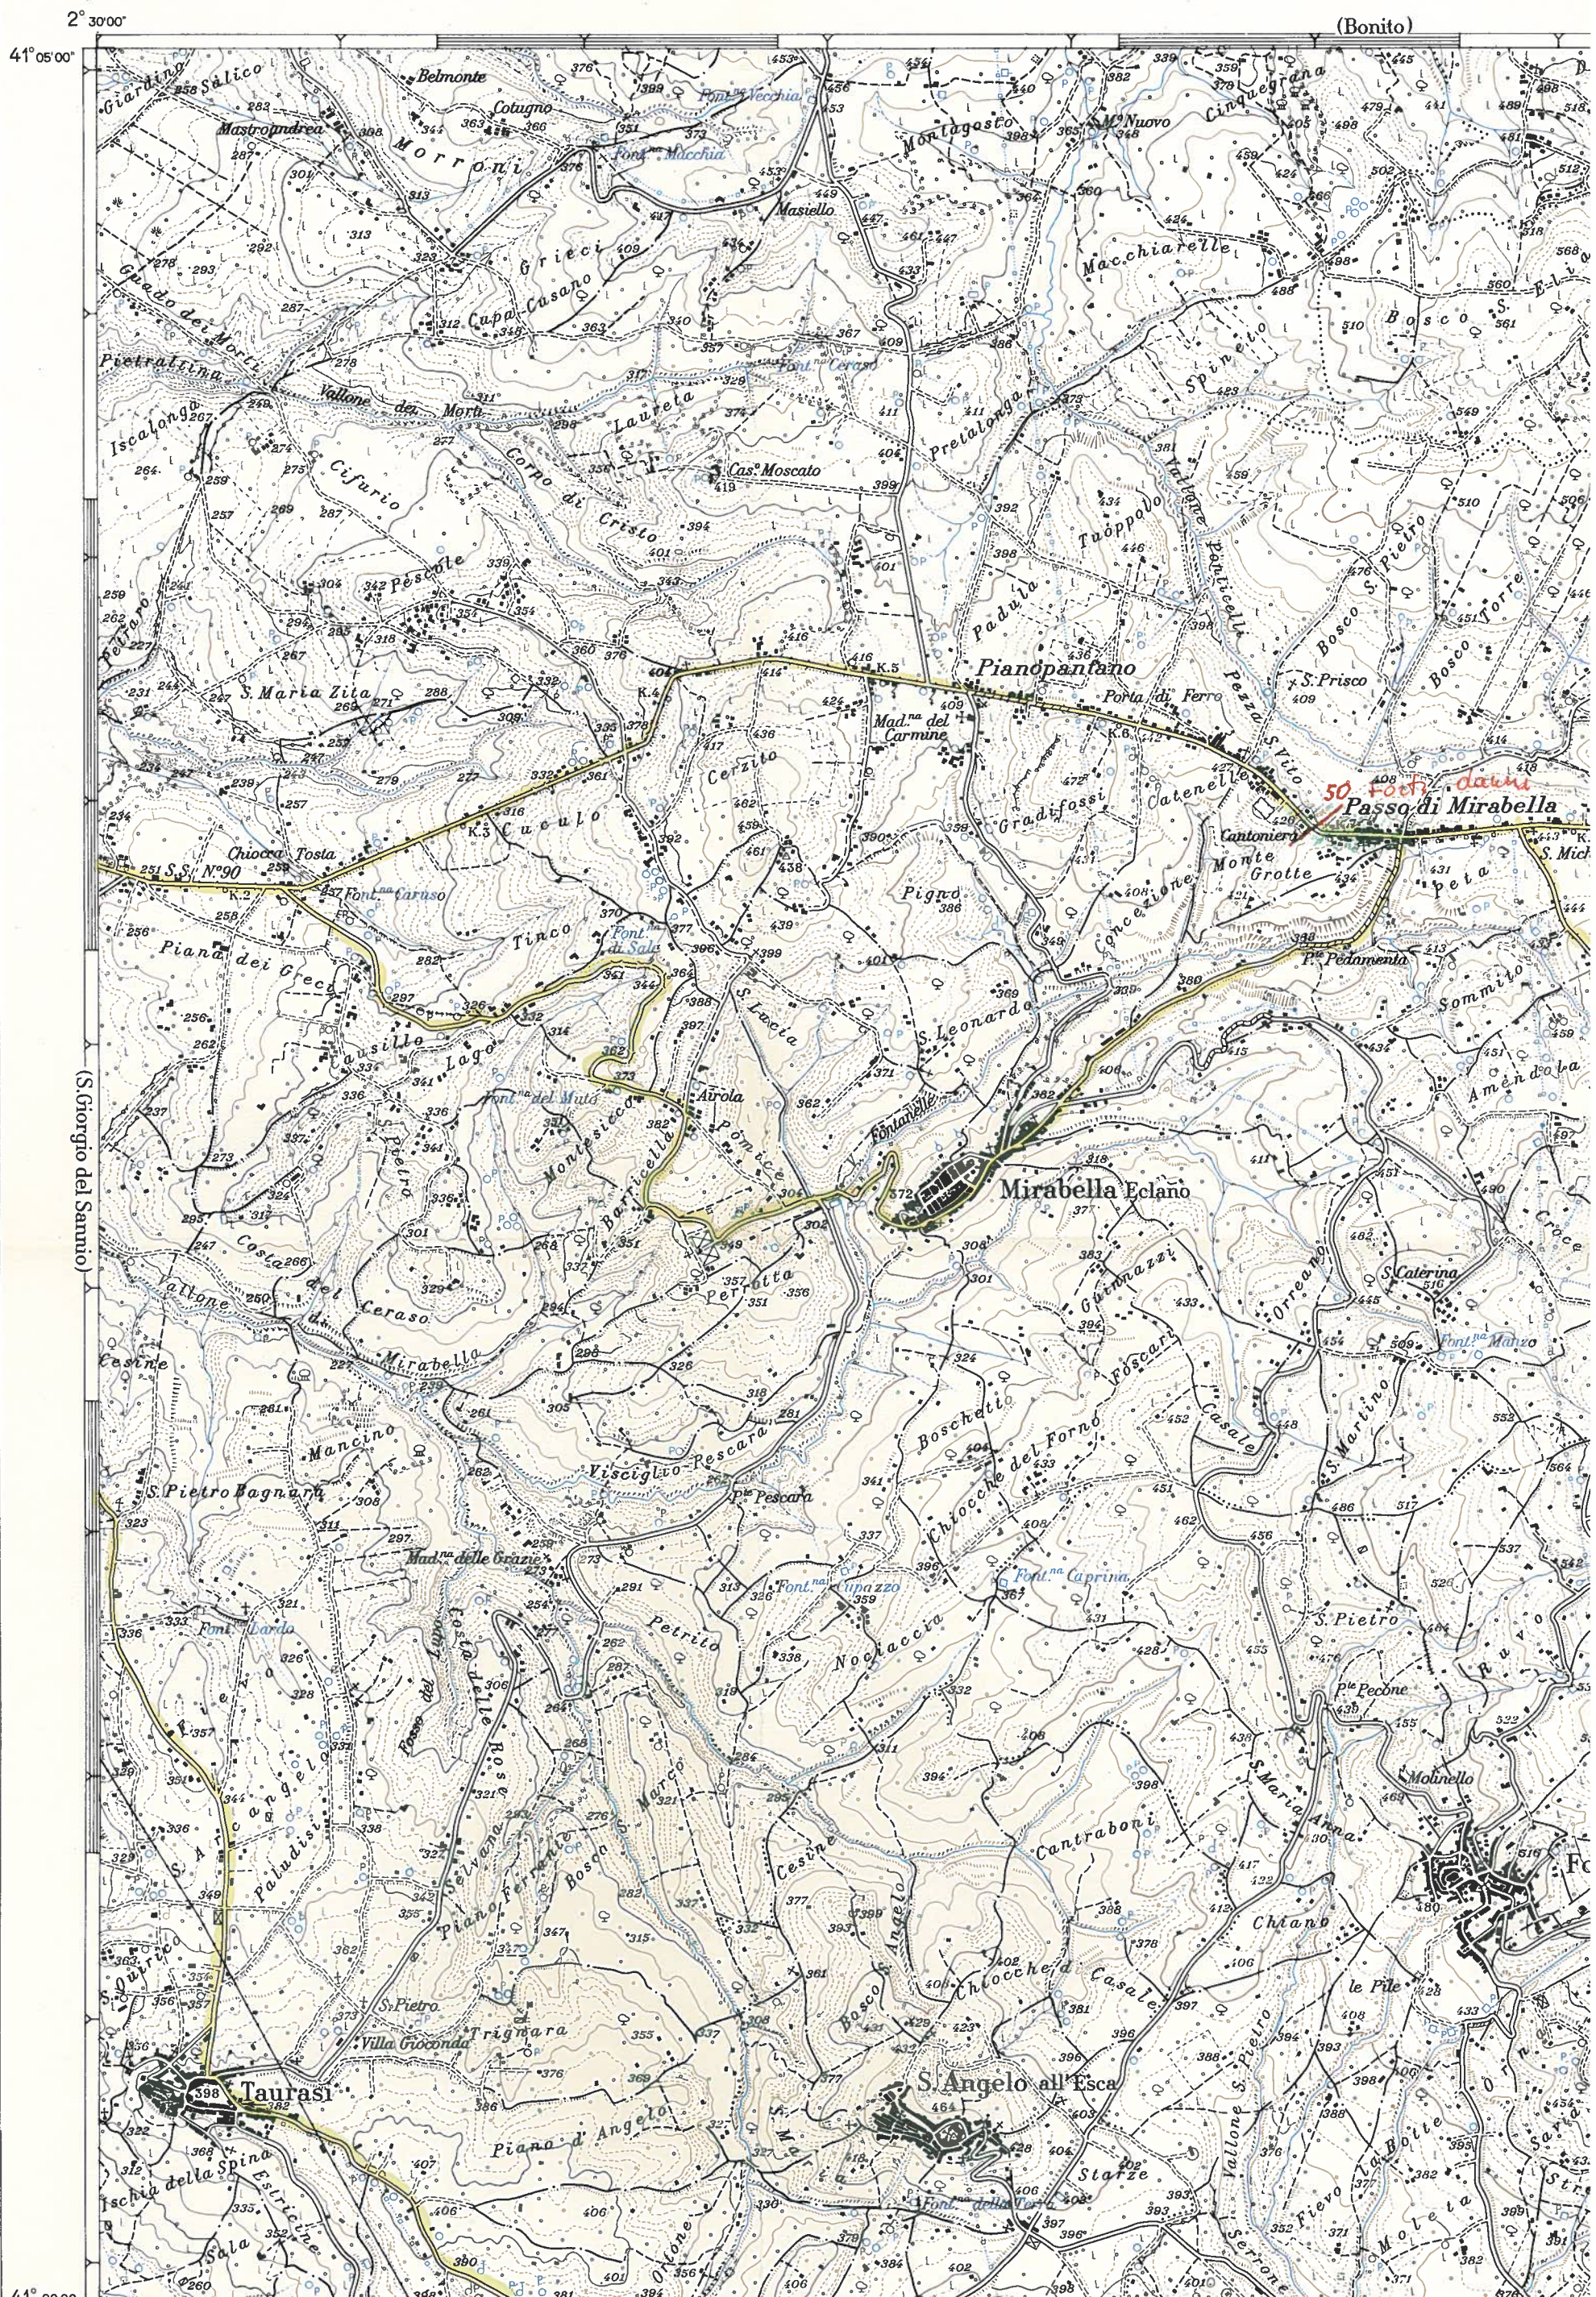



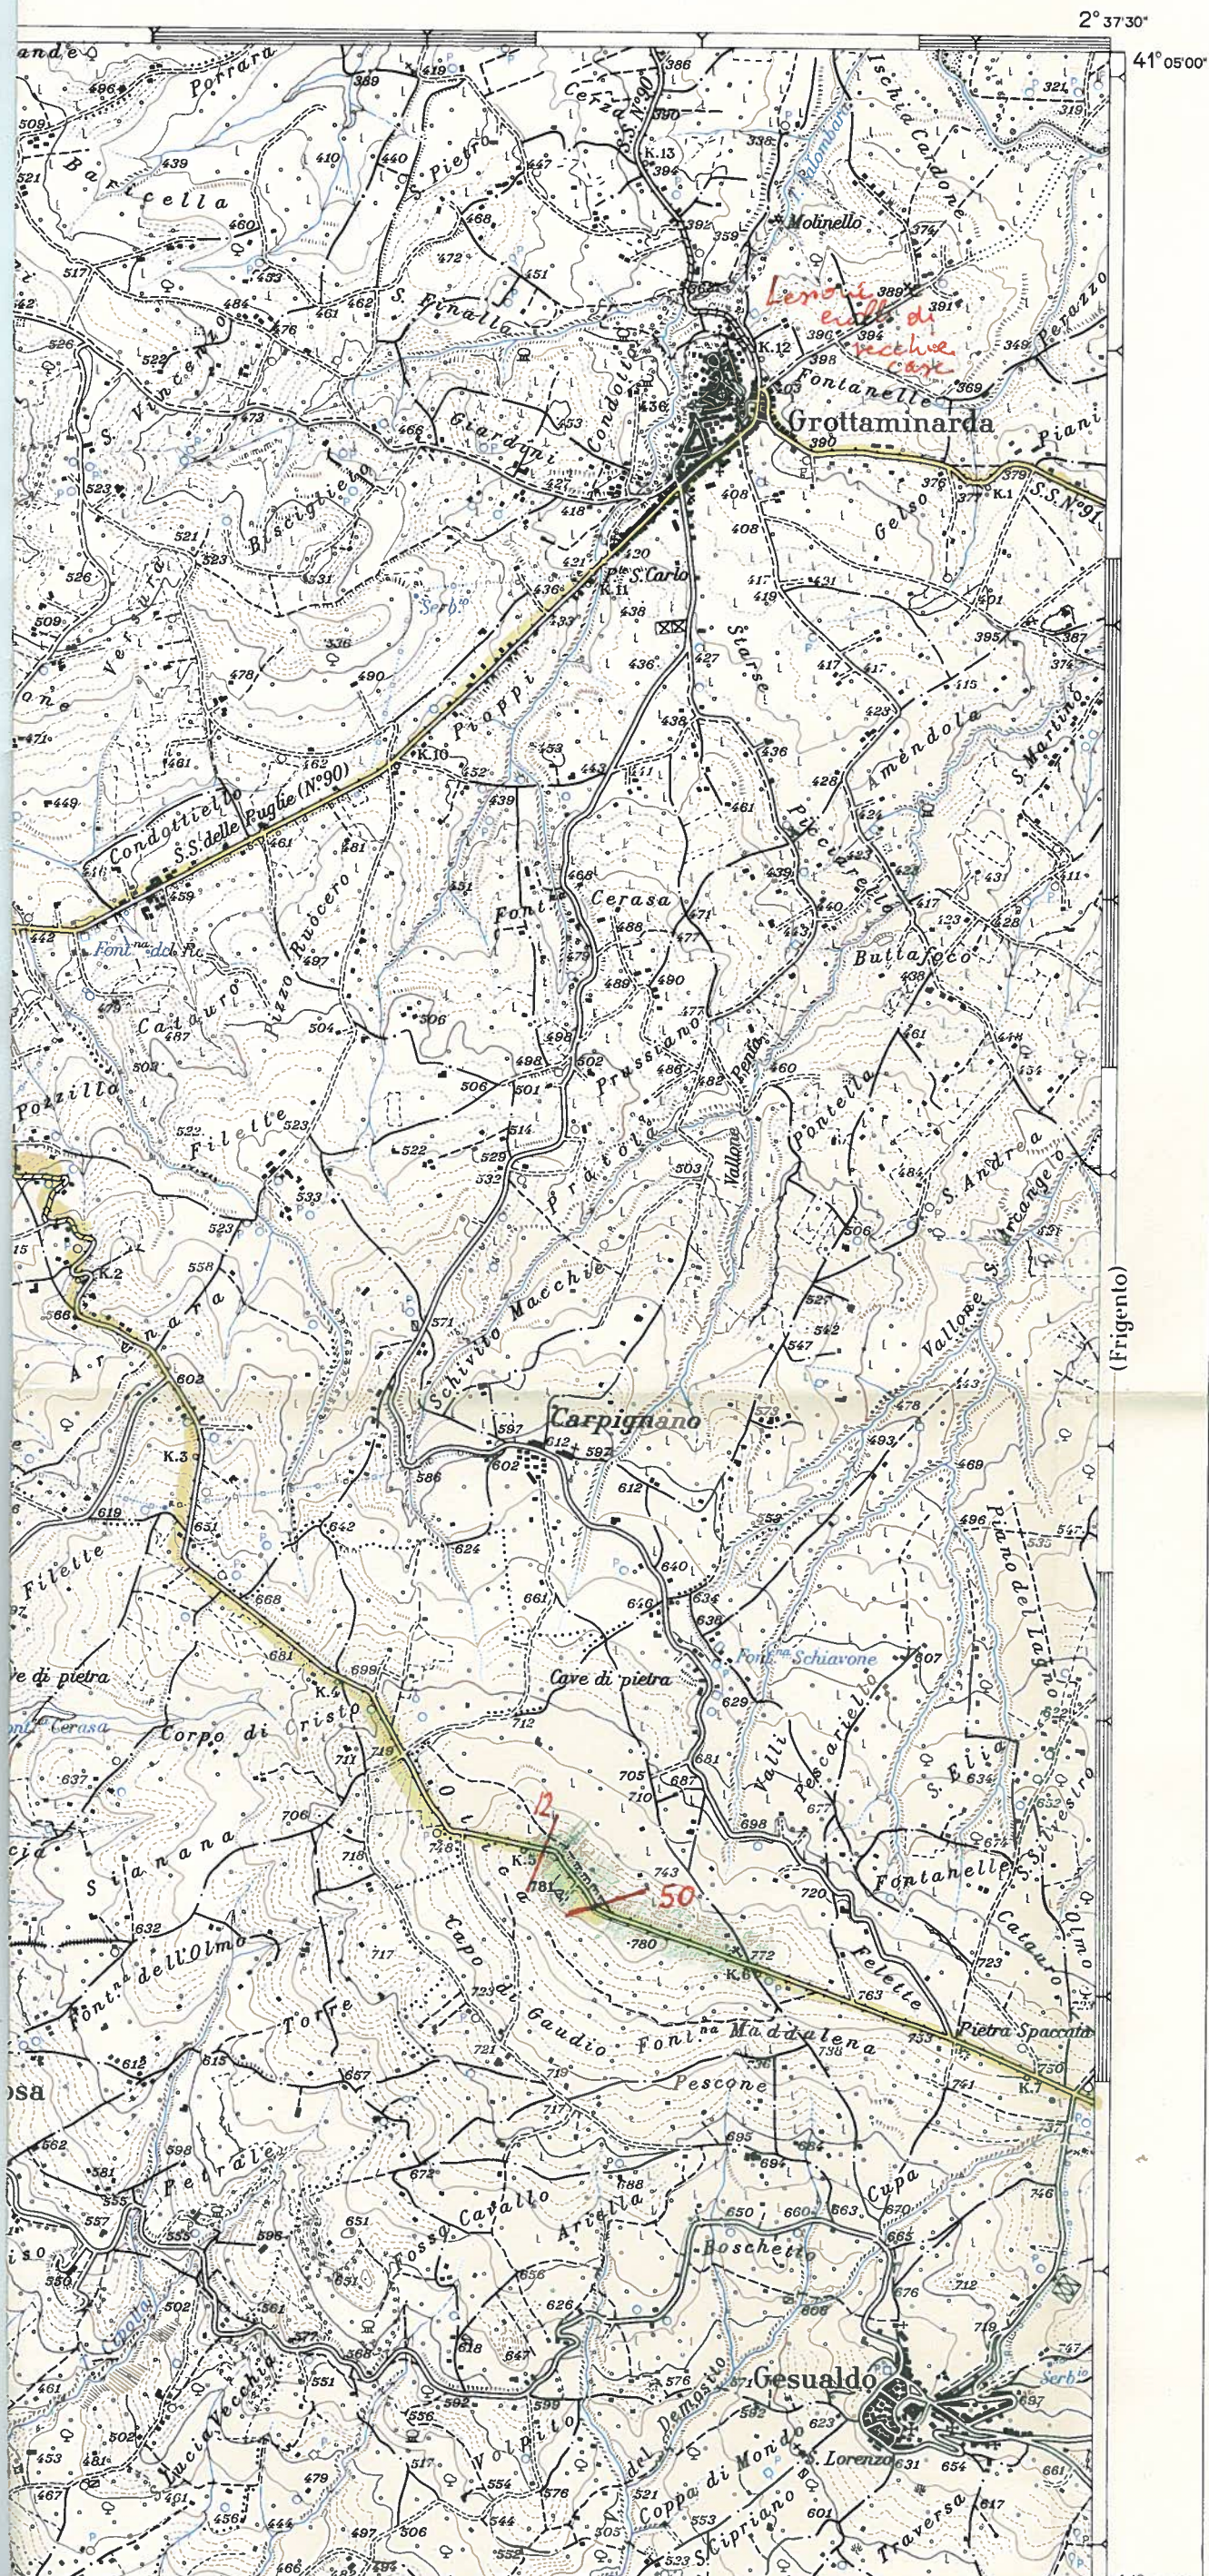

Le coordinate dei vertici di questa carta nel reticolato italiano (proiezione Gauss-Boaga, ellissoide internazionale, orientamento a M. Mario 1940) sono le seguenti:

## FUSO EST

|       |             |       |             |
|-------|-------------|-------|-------------|
| N. O. | E = 2515996 | N. E. | E = 2526496 |
|       | N = 4548089 |       | N = 4548090 |
| S. O. | E = 2515991 | S. E. | E = 2526504 |
|       | N = 4538837 |       | N = 4538839 |

Nelle carte sulle quali è stato tracciato il reticolato italiano, questo è indicato nella cornice con i seguenti segni convenzionali: fuso est — fuso ovest —



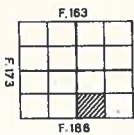

Vallata

# F. 174 della Carta d'Italia

## VALLATA

Longitudine Est dal meridiano di Roma (Monte Mario)

2°45'00"

(Monteleone di Puglia)

41°05'00"

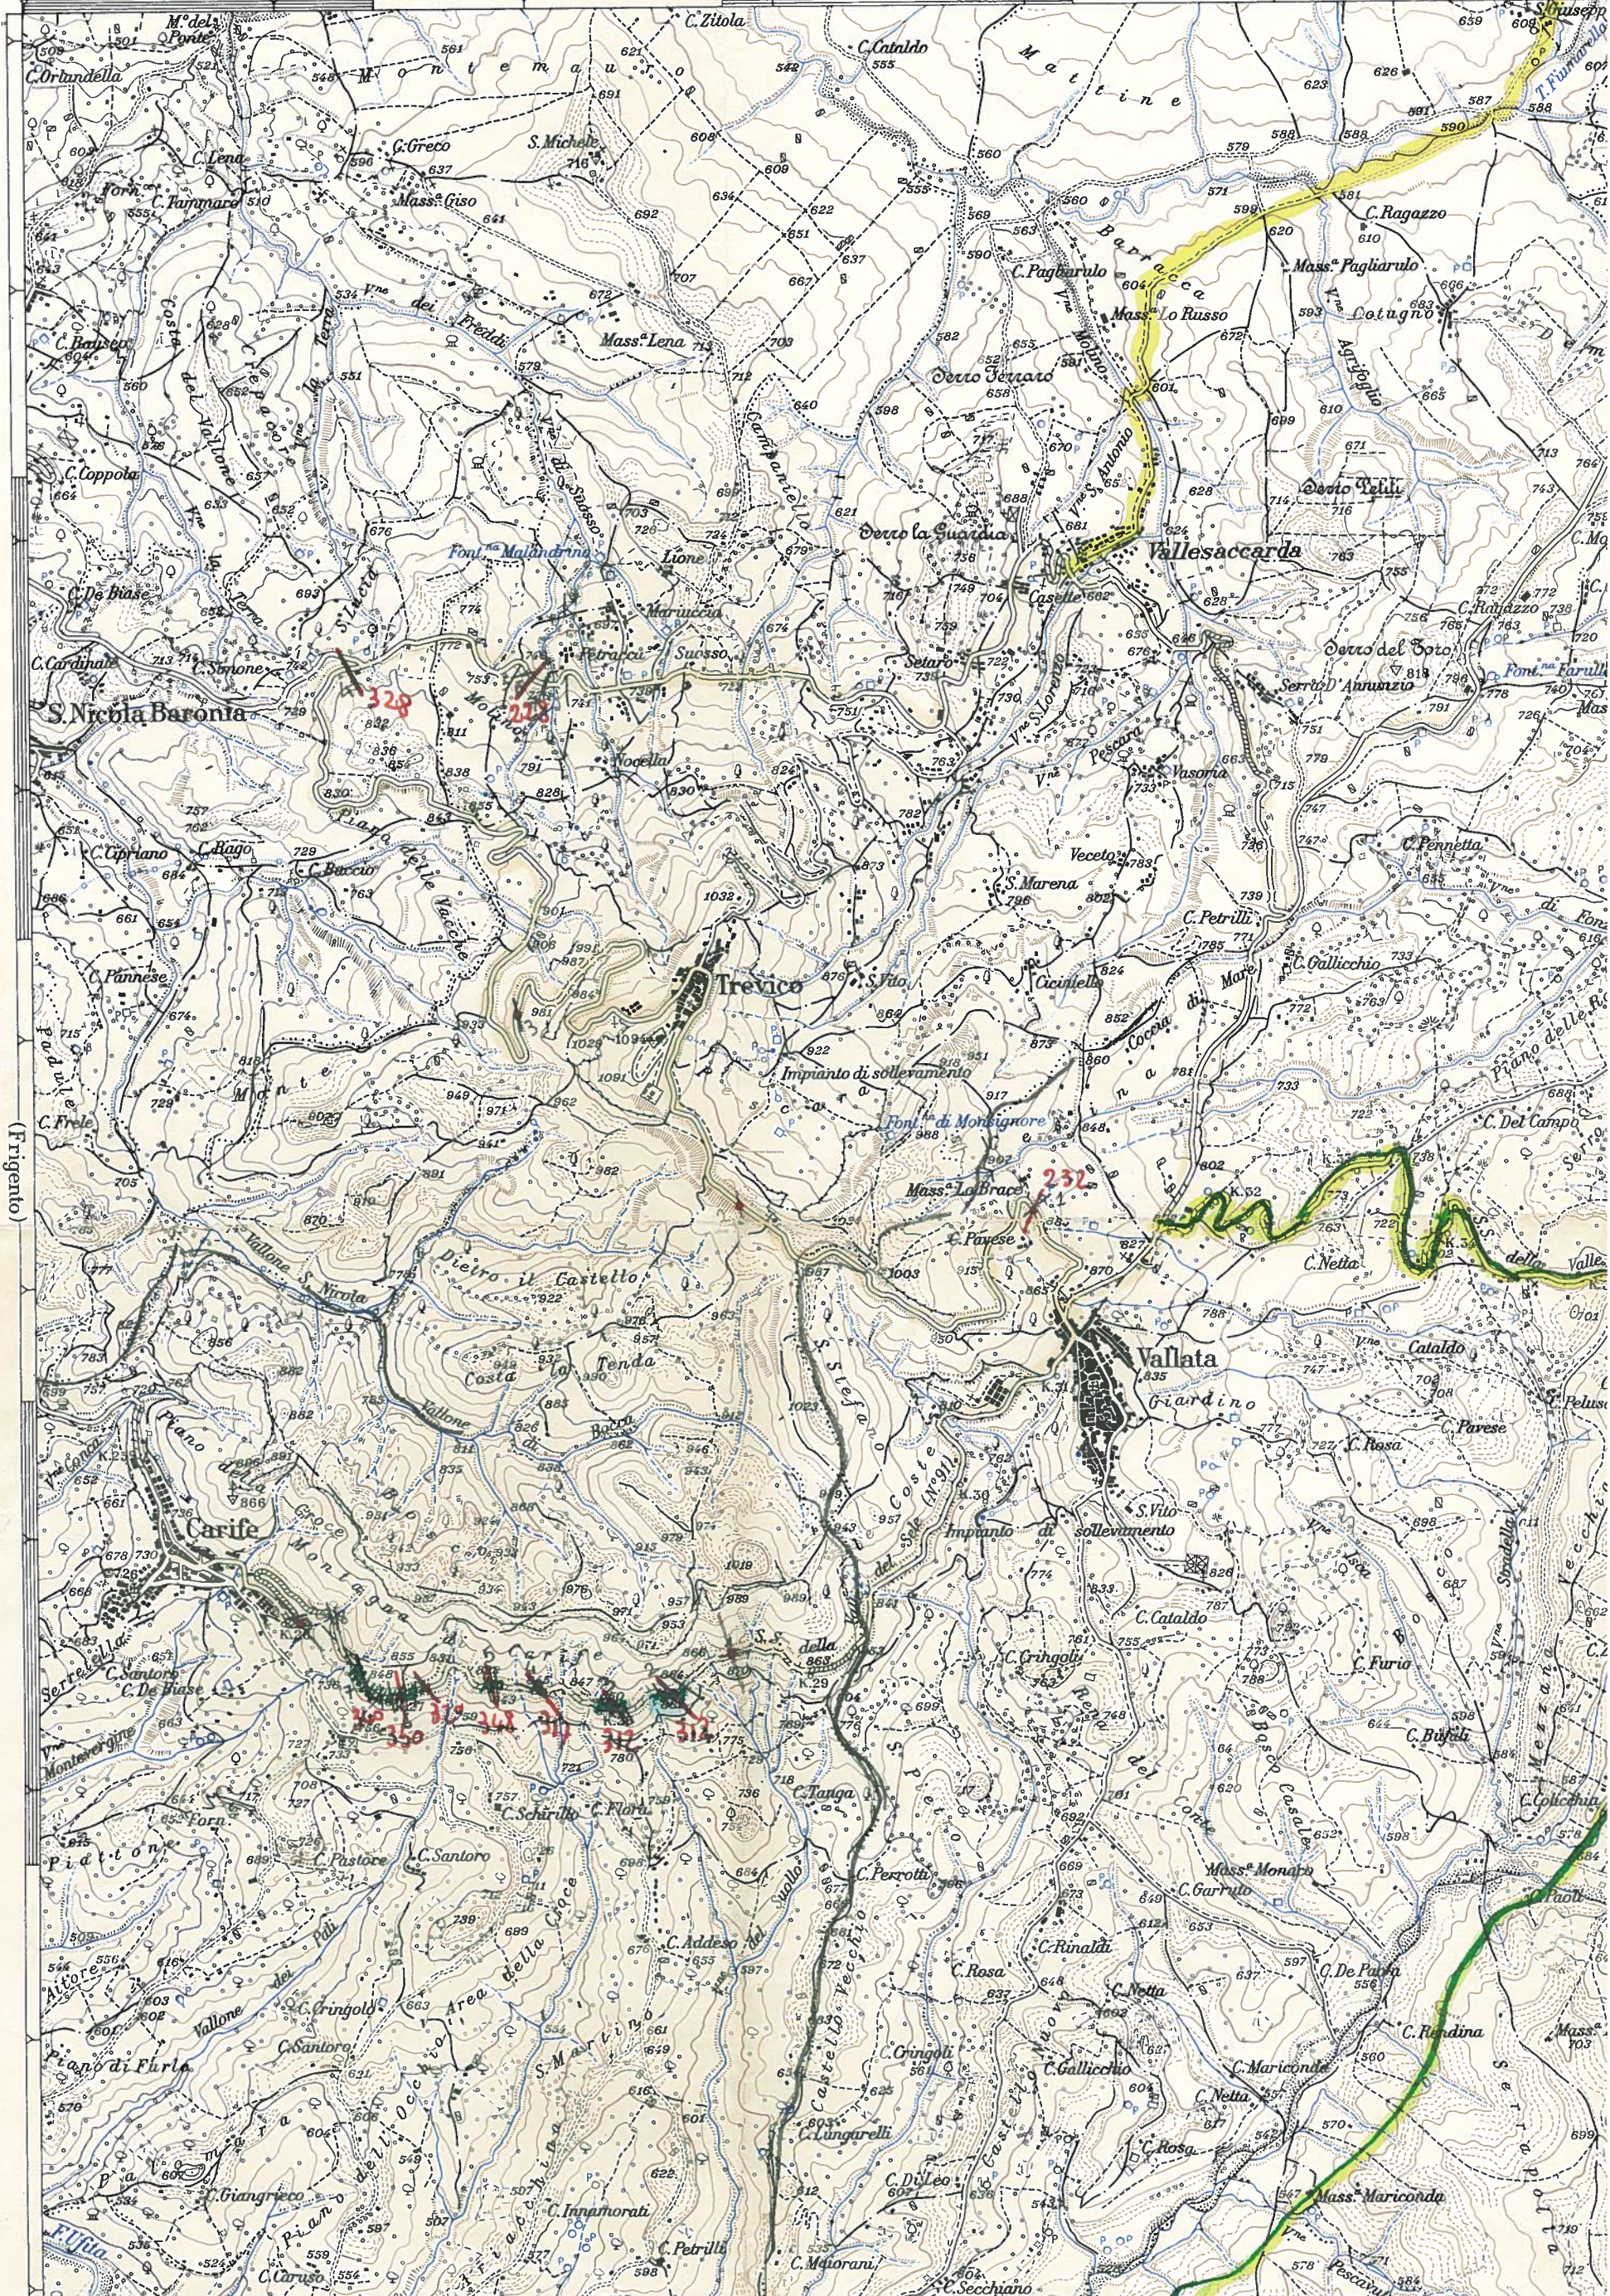



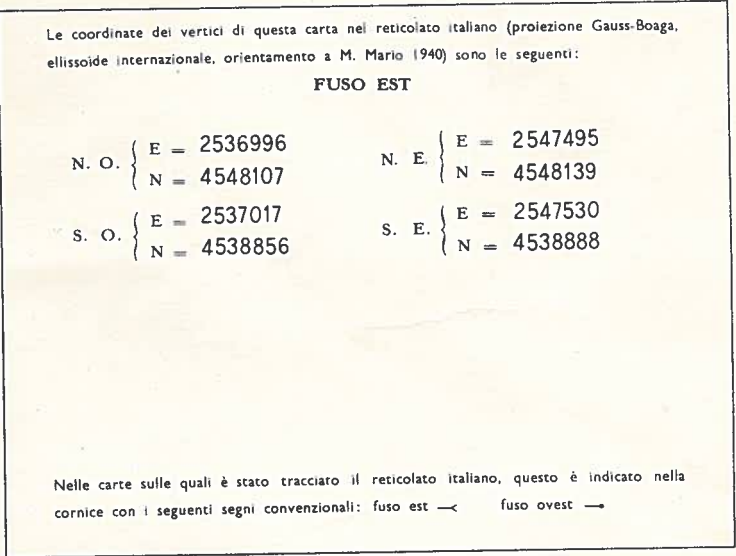

  Casa in muratura, baracca, capanna, ruderi  
   Opifici: a forza idraulica, a vapore, elettrici  
  Centrali: idroelettrica, termoelettrica  
  Chiese, cappella od oratori  
   Tabernacolo o pigna, croce isolata, cinilero  
  Fumaiolo, torre, giulone, campanile  
  Pietra o colonna indicatrice, monumento notevole  
  Staz. e antenna radio, faro, fanale  
  Miniera, aeromotore, pozzo di petrolio o di metano

  Pozzo e sorgente perenne  
  Pozzo e sorgente non perenne  
  Pozzo con aeromotore, noria od altro mezzo di estrazione  
  Pozzo artesiano, fontana, cisterna  
  Abbeveratoio, cascata  
Muri a calce a secco e maceria di sostegno  
Palizzata o staccionata siepe filo spinale  
         
         
         
         
         
         
         
         
         
         
         
         
      



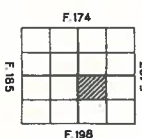

Calabritto

# F°186 della Carta d'Italia

## CALABRITTO

Longitudine Est dal meridiano di Roma (Monte Mario)

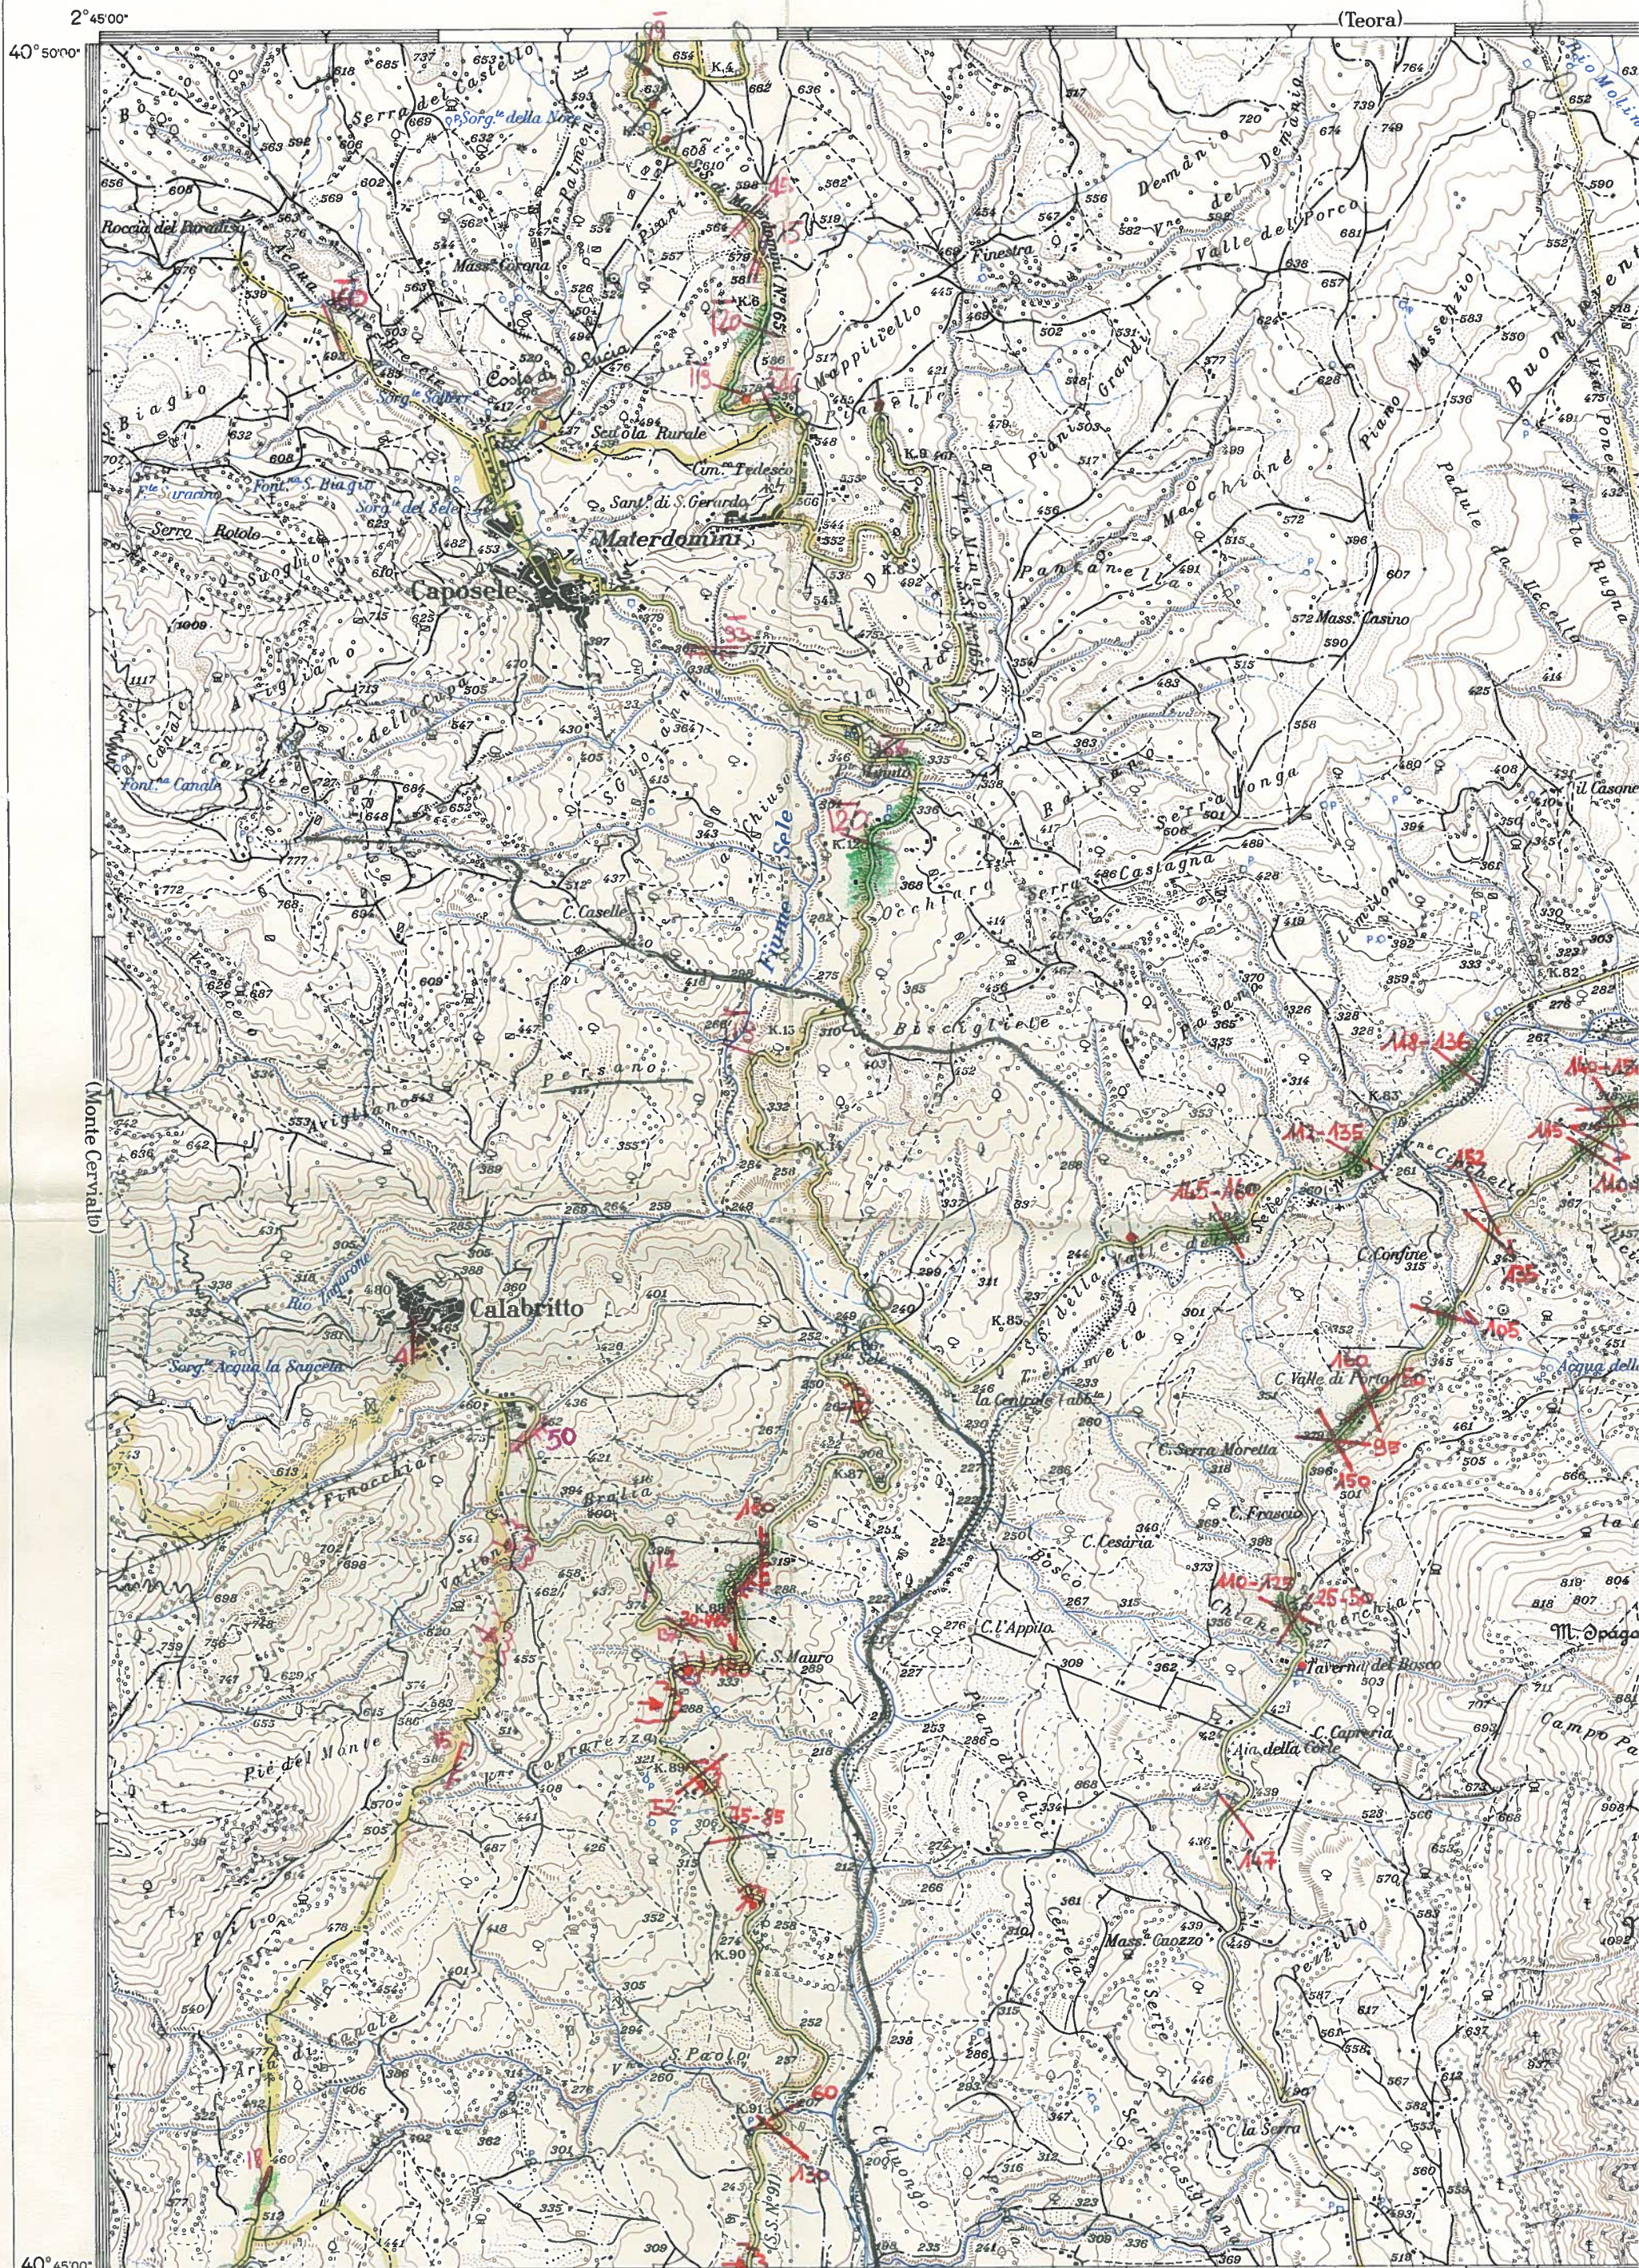



II N.O.

CALABRITTO  
KM

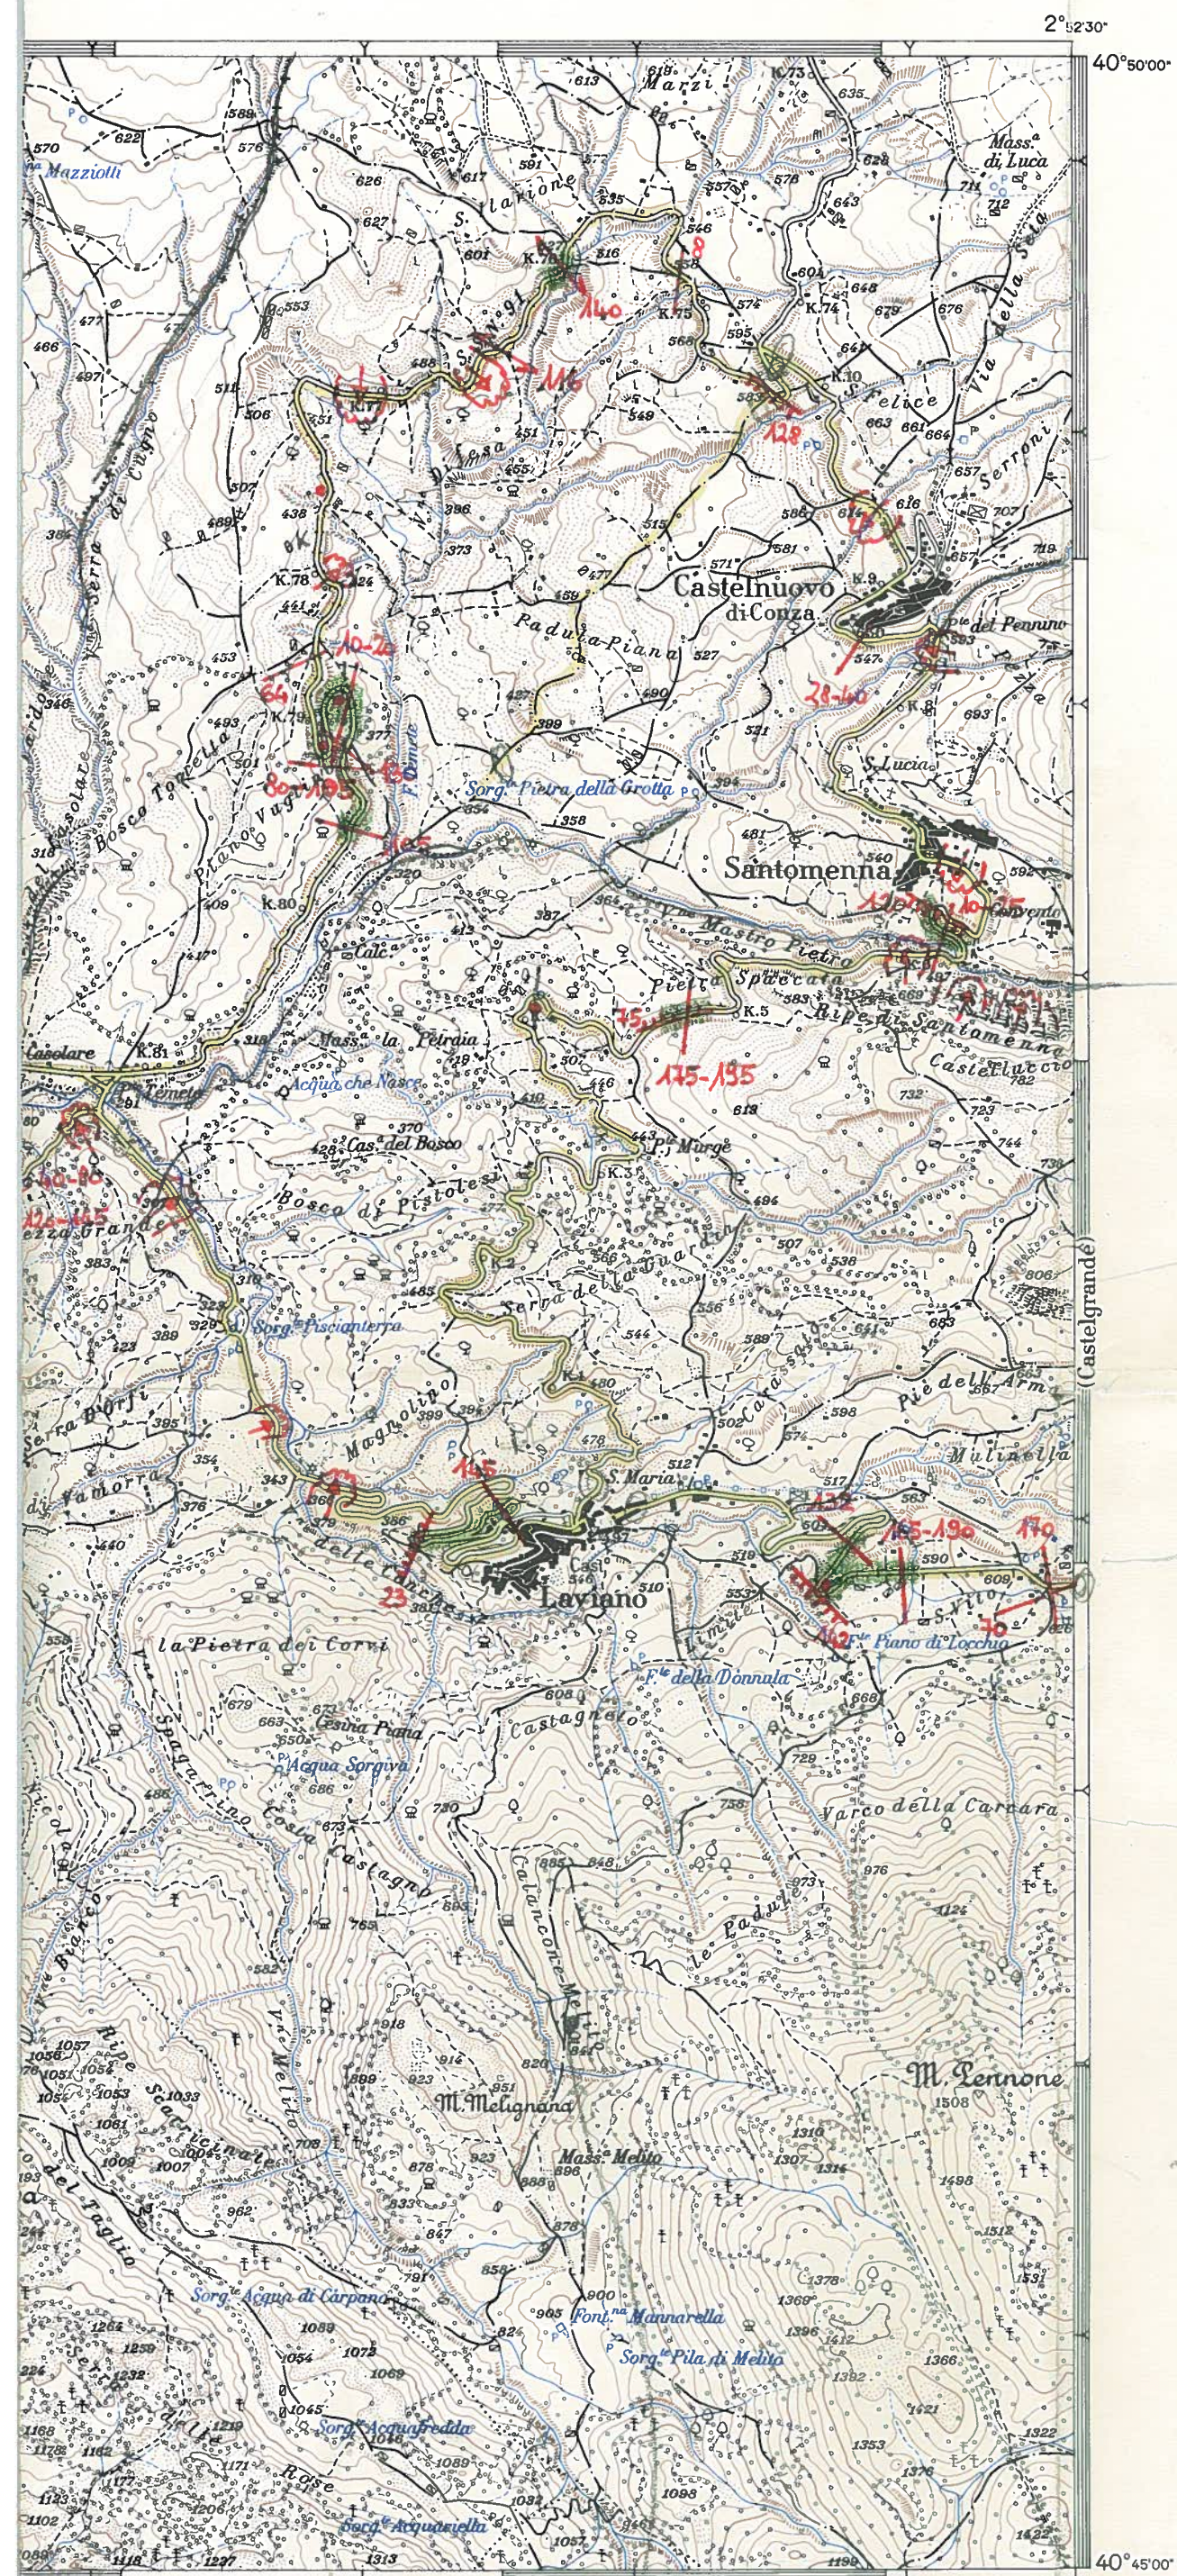

|            |    |   |
|------------|----|---|
| Cotelnwood | 10 | } |
| Santomero  | 10 |   |
| Louisano   | 10 |   |
| Calabritto | 1X |   |
| Caporelli  | 1X |   |

M colored other w/ orenales  
137 rose Yellow  
⇒ money  
gills

FUSO EST

N. O.  $\left\{ \begin{array}{l} E = 2537060 \\ N = 4520354 \end{array} \right.$

S. O.  $\left\{ \begin{array}{l} E = 2537082 \\ N = 4511104 \end{array} \right.$

$$\begin{array}{l} \text{N. E.} \left\{ \begin{array}{l} E = 2547600 \\ N = 4520386 \end{array} \right. \\ \text{S. E.} \left\{ \begin{array}{l} E = 2547634 \\ N = 4511135 \end{array} \right. \end{array}$$

Nelle carte sulle quali è stato tracciato il reticolato italiano, questo è indicato nella cornice con i seguenti segni convenzionali: fuso est  $\leftarrow$  , fuso ovest  $\rightarrow$



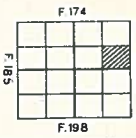

Calitri

F° 186 della Carta d'Italia

CALITRI

Longitudine Est dal meridiano di Roma (Monte Mario)

2° 52' 30"

40° 55' 00"

(Monte Mattina)

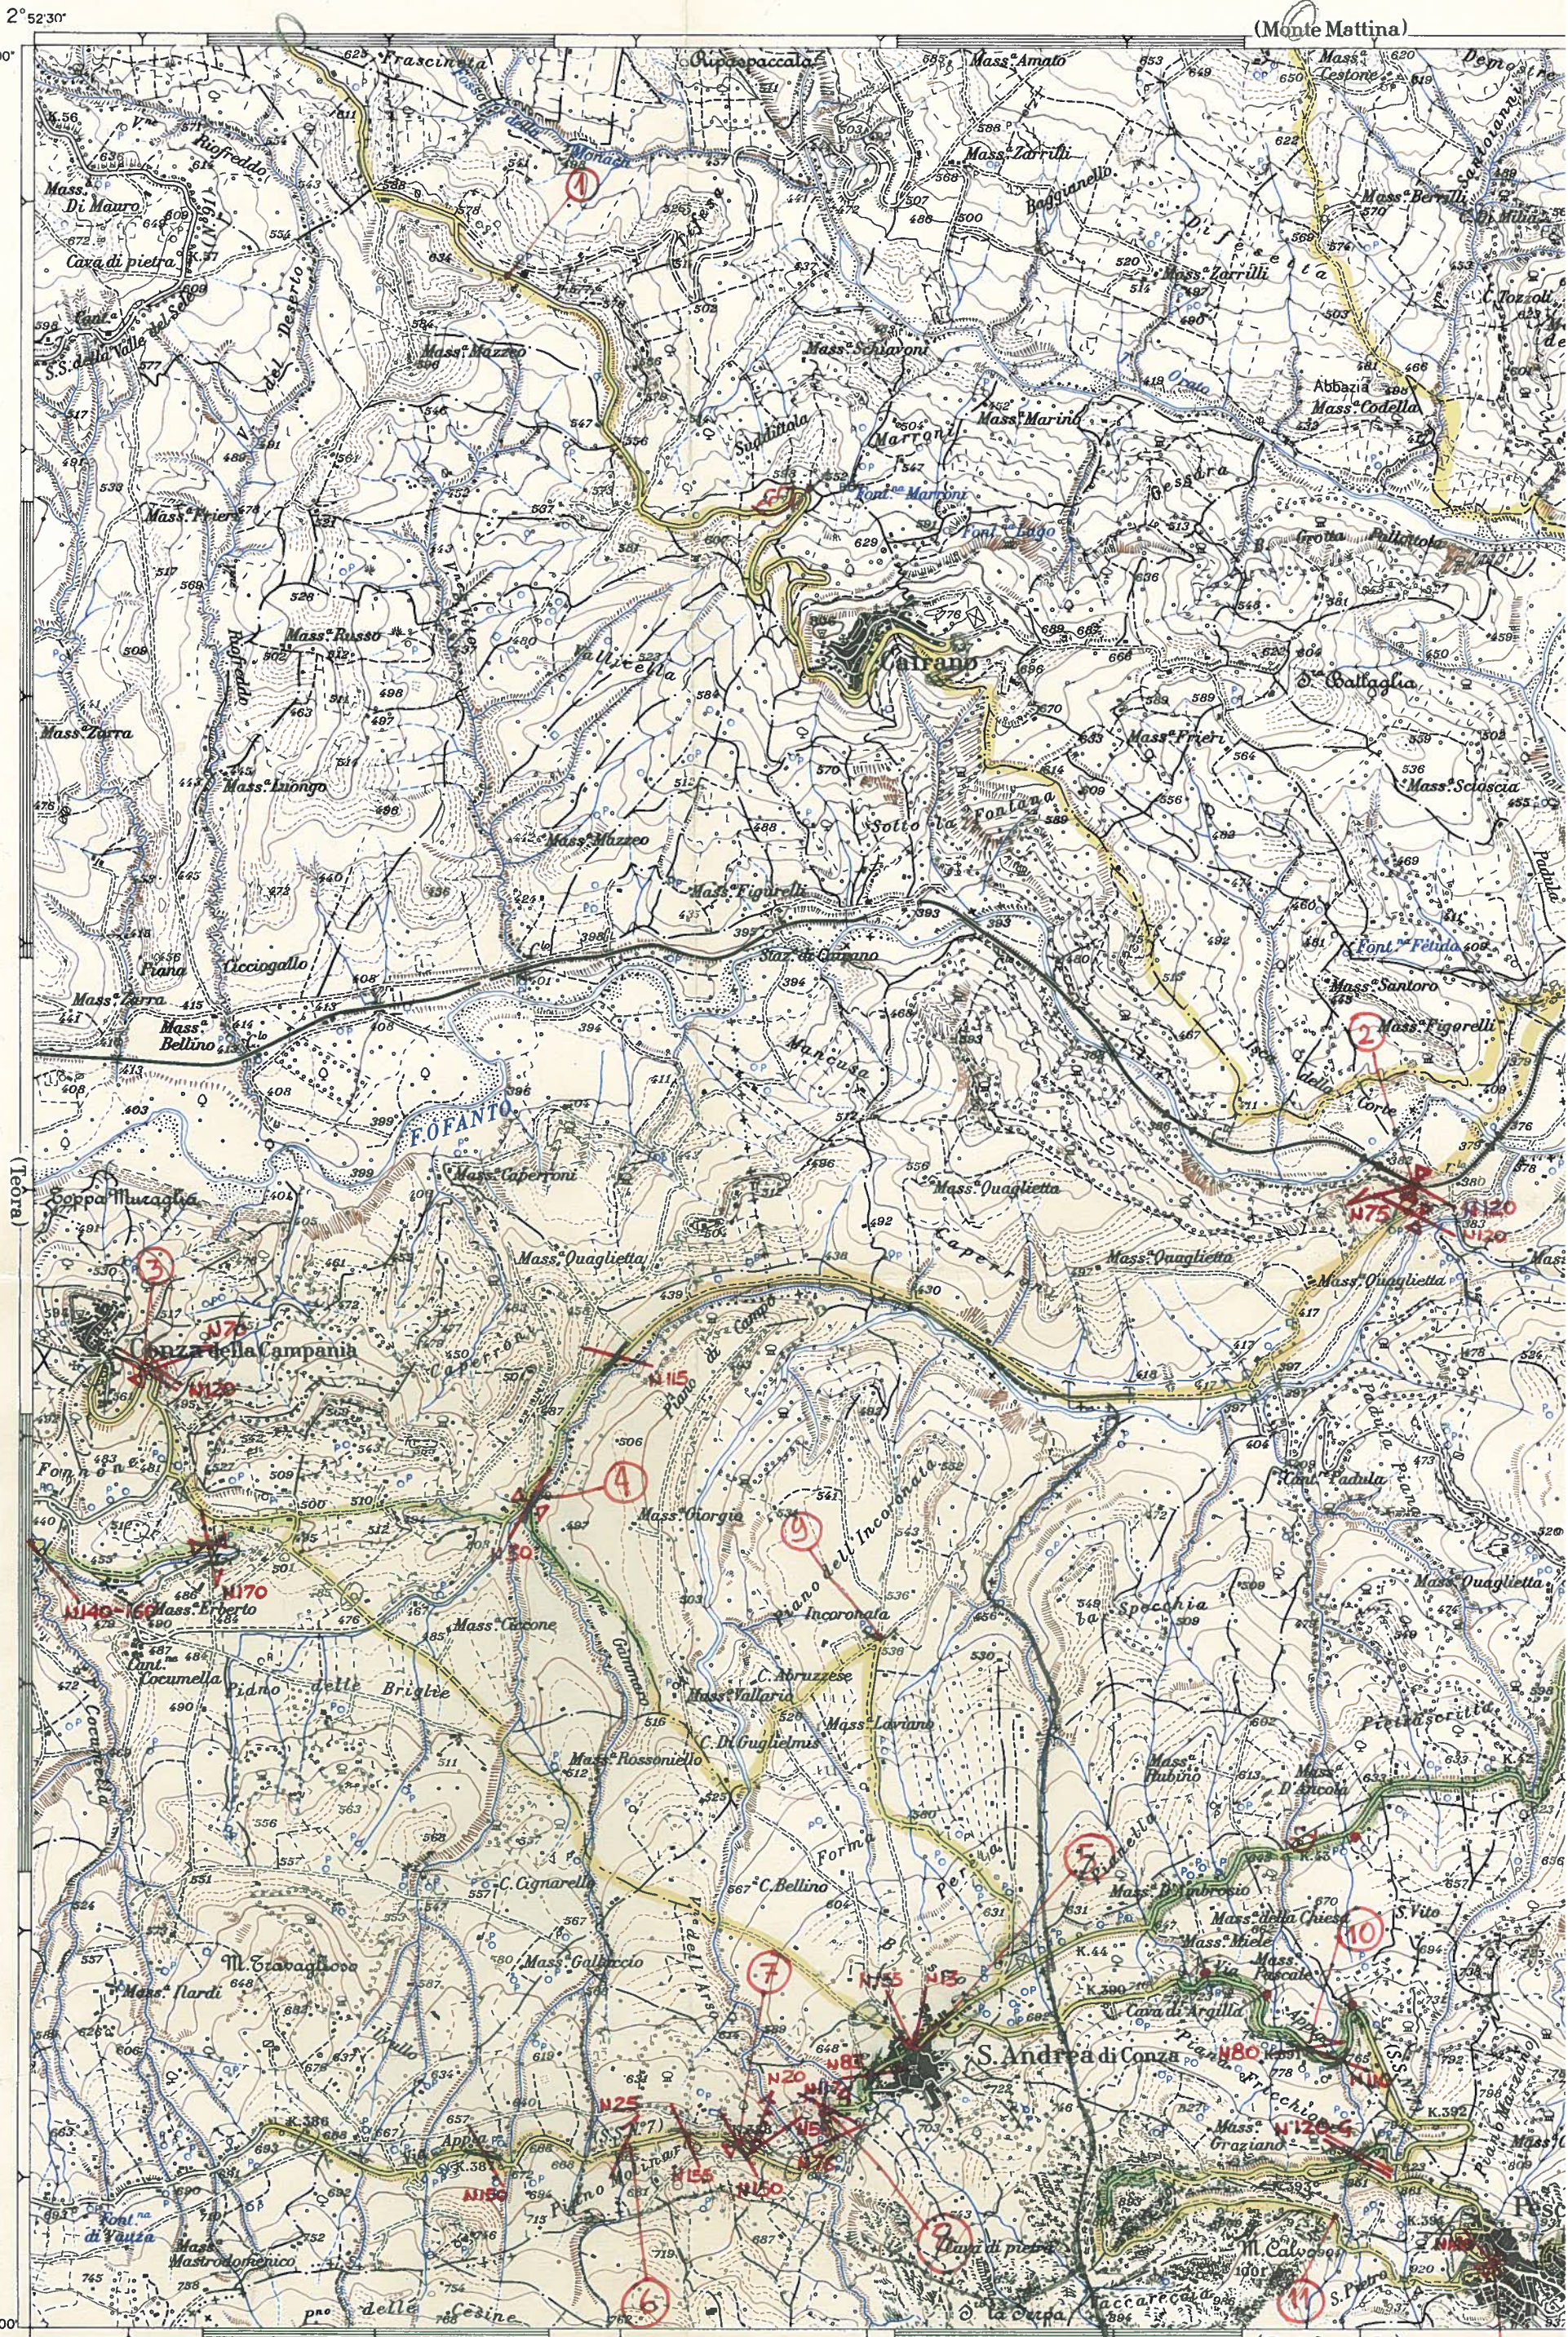

(Teora)

(Castelgrande)



Le coordinate geografiche sono riferite all'Ellissoide  
Internazionale orientato a Roma (M. Mario)

I S. E.

3° 00' 00"

40° 55' 00"

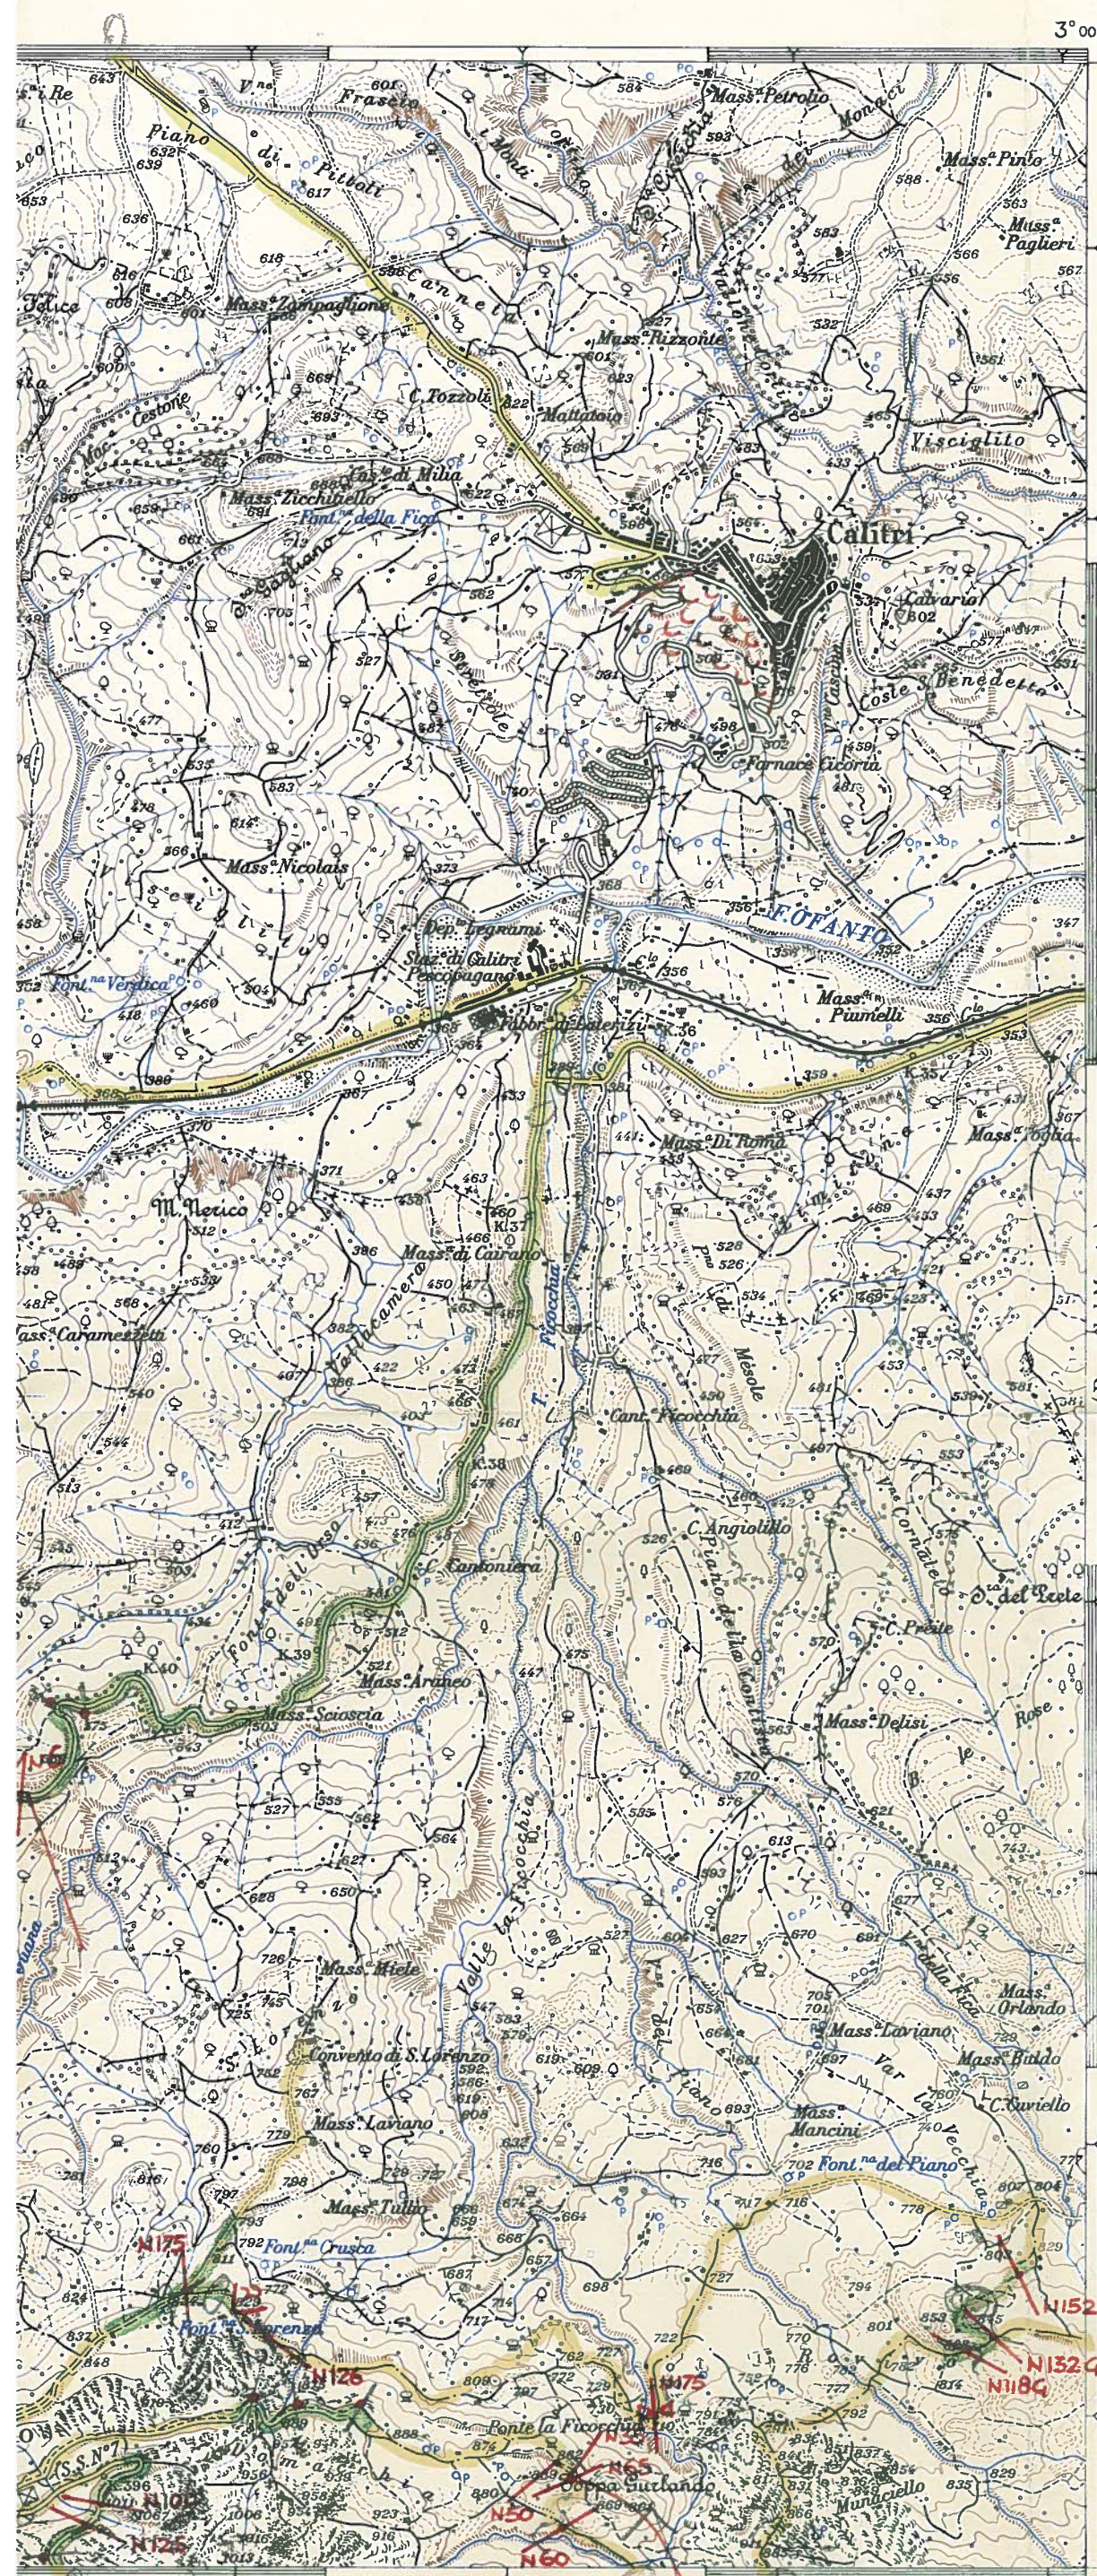

(Riv. del Monte)

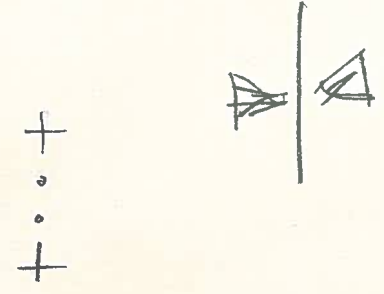

Le coordinate dei vertici di questa carta nel reticolato italiano (proiezione Gauss-Boaga, ellissoide internazionale, orientamento a M. Mario 1940) sono le seguenti:

FUSO EST

|       |             |       |             |
|-------|-------------|-------|-------------|
| N. O. | E = 2547565 | N. E. | E = 2558092 |
|       | N = 4529637 |       | N = 4529684 |
| S. O. | E = 2547600 | S. E. | E = 2558139 |
|       | N = 4520386 |       | N = 4520433 |

Nelle carte sulle quali è stato tracciato il reticolato italiano, questo è indicato nella cornice con i seguenti segni convenzionali: fuso est — , fuso ovest —

37.

40° 50' 00"



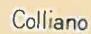

COLLIANO

(Calabritto)

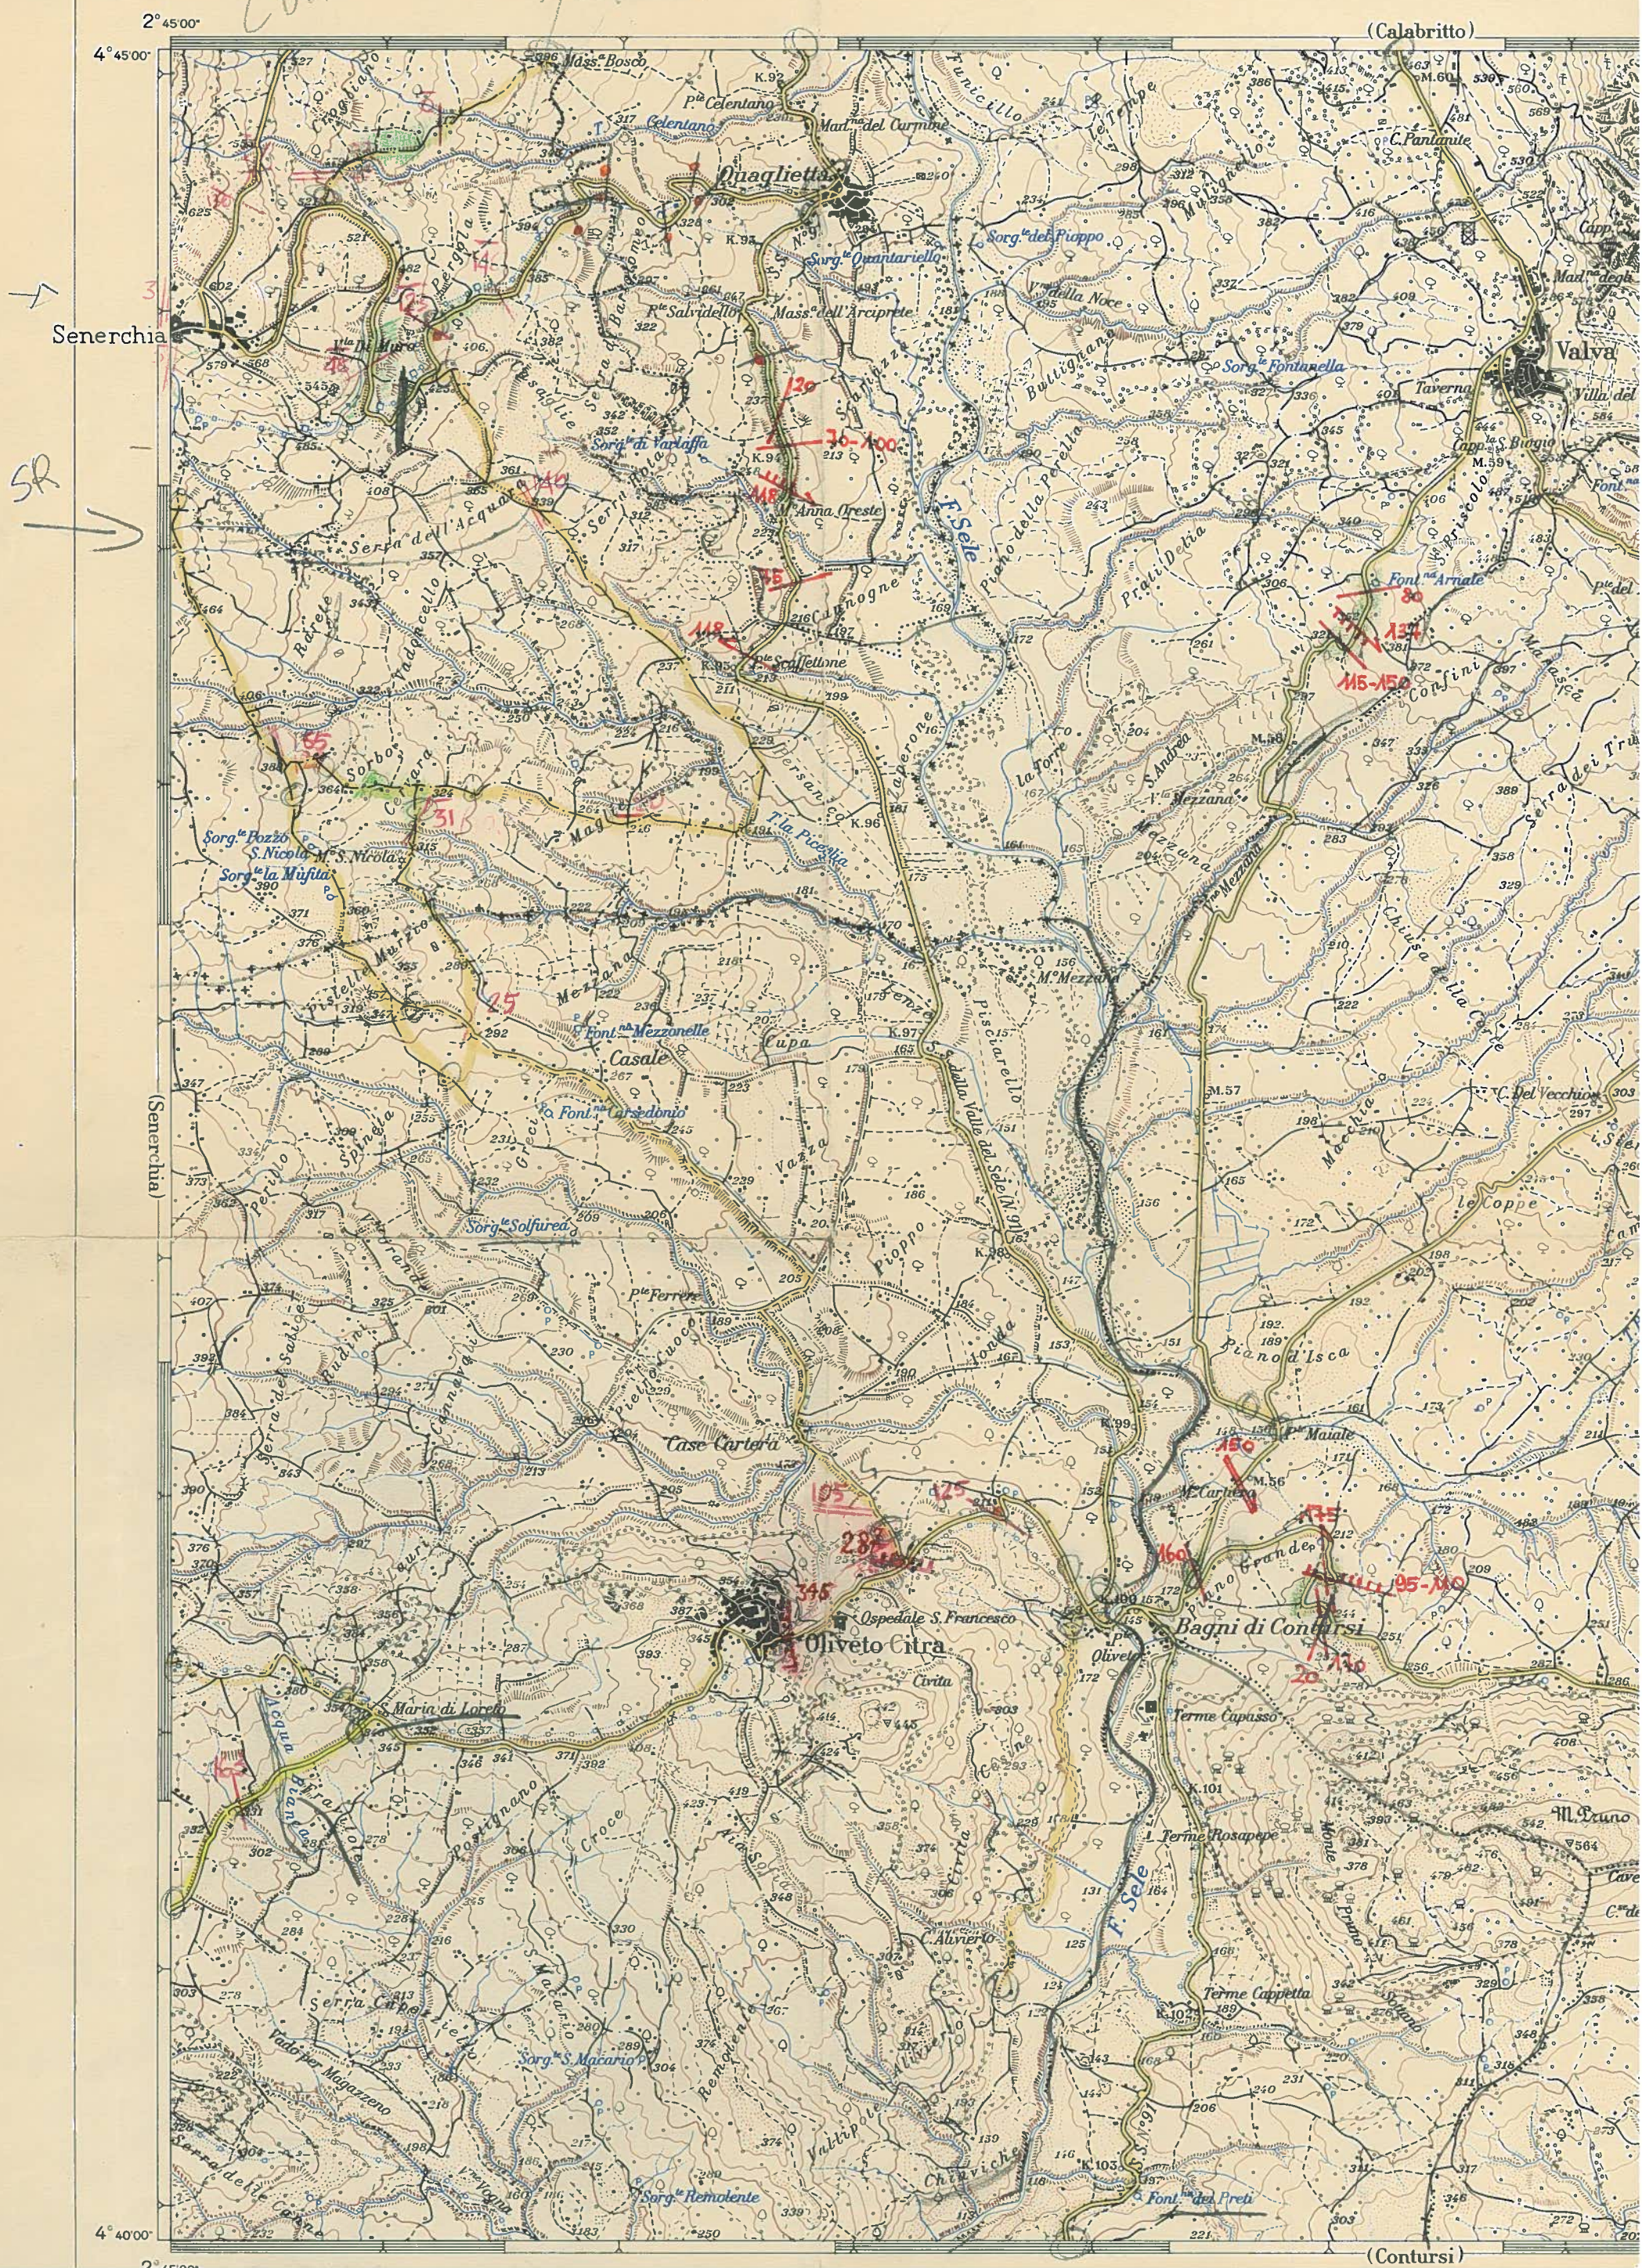



Le coordinate geografiche sono riferite all'Ellissoide  
Internazionale orientato a Roma (M. Mario)

II S.O.

KA

2° 52' 30"

40° 45' 00"

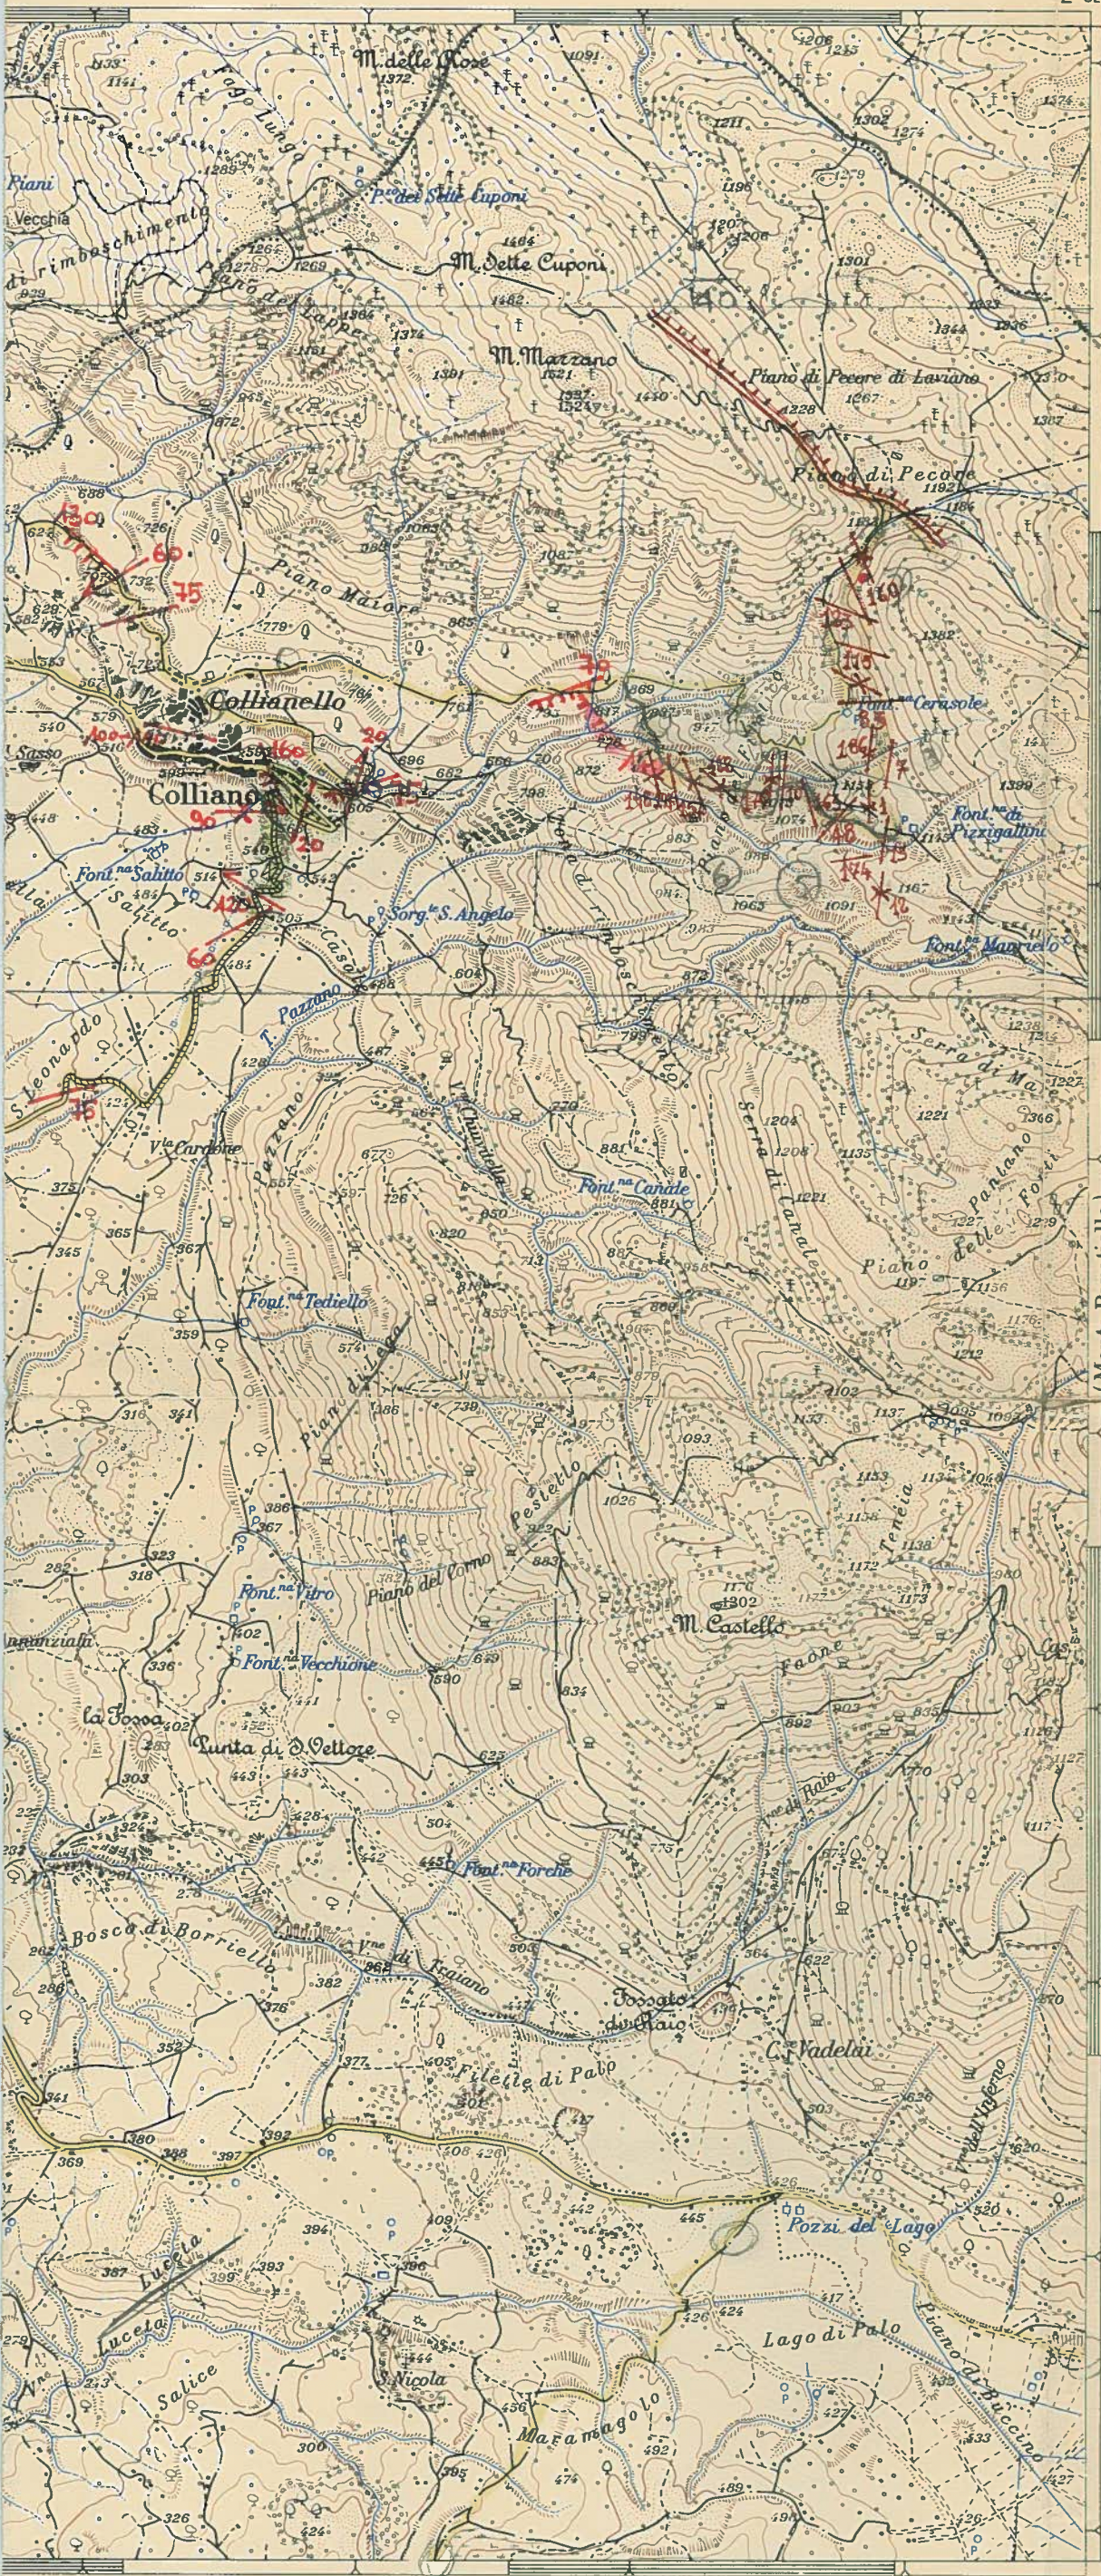

C/2 Sgrove

10 Km<sup>2</sup> (4 x 2.5 km)  
area considerata

Le coordinate dei vertici di questa carta nel reticolato italiano (proiezione Gauss-Boaga, ellissoide internazionale, orientamento a M. Mario 1940) sono le seguenti:

FUSO EST

|         |             |         |             |
|---------|-------------|---------|-------------|
| N. O. { | E = 2537082 | N. E. { | E = 2547634 |
|         | N = 4511104 |         | N = 4511135 |
| S. O. { | E = 2537103 | S. E. { | E = 2547669 |
|         | N = 4501853 |         | N = 4501884 |

Nelle carte sulle quali è stato tracciato il reticolato italiano, questo è indicato nella cornice con i seguenti segni convenzionali: fuso est ← fuso ovest →

40° 40' 00"



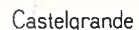

CASTELGRANDI

**Longitudine Est dal meridiano di Roma (Monte Mario)**

2°52'30"

—(Calitri)

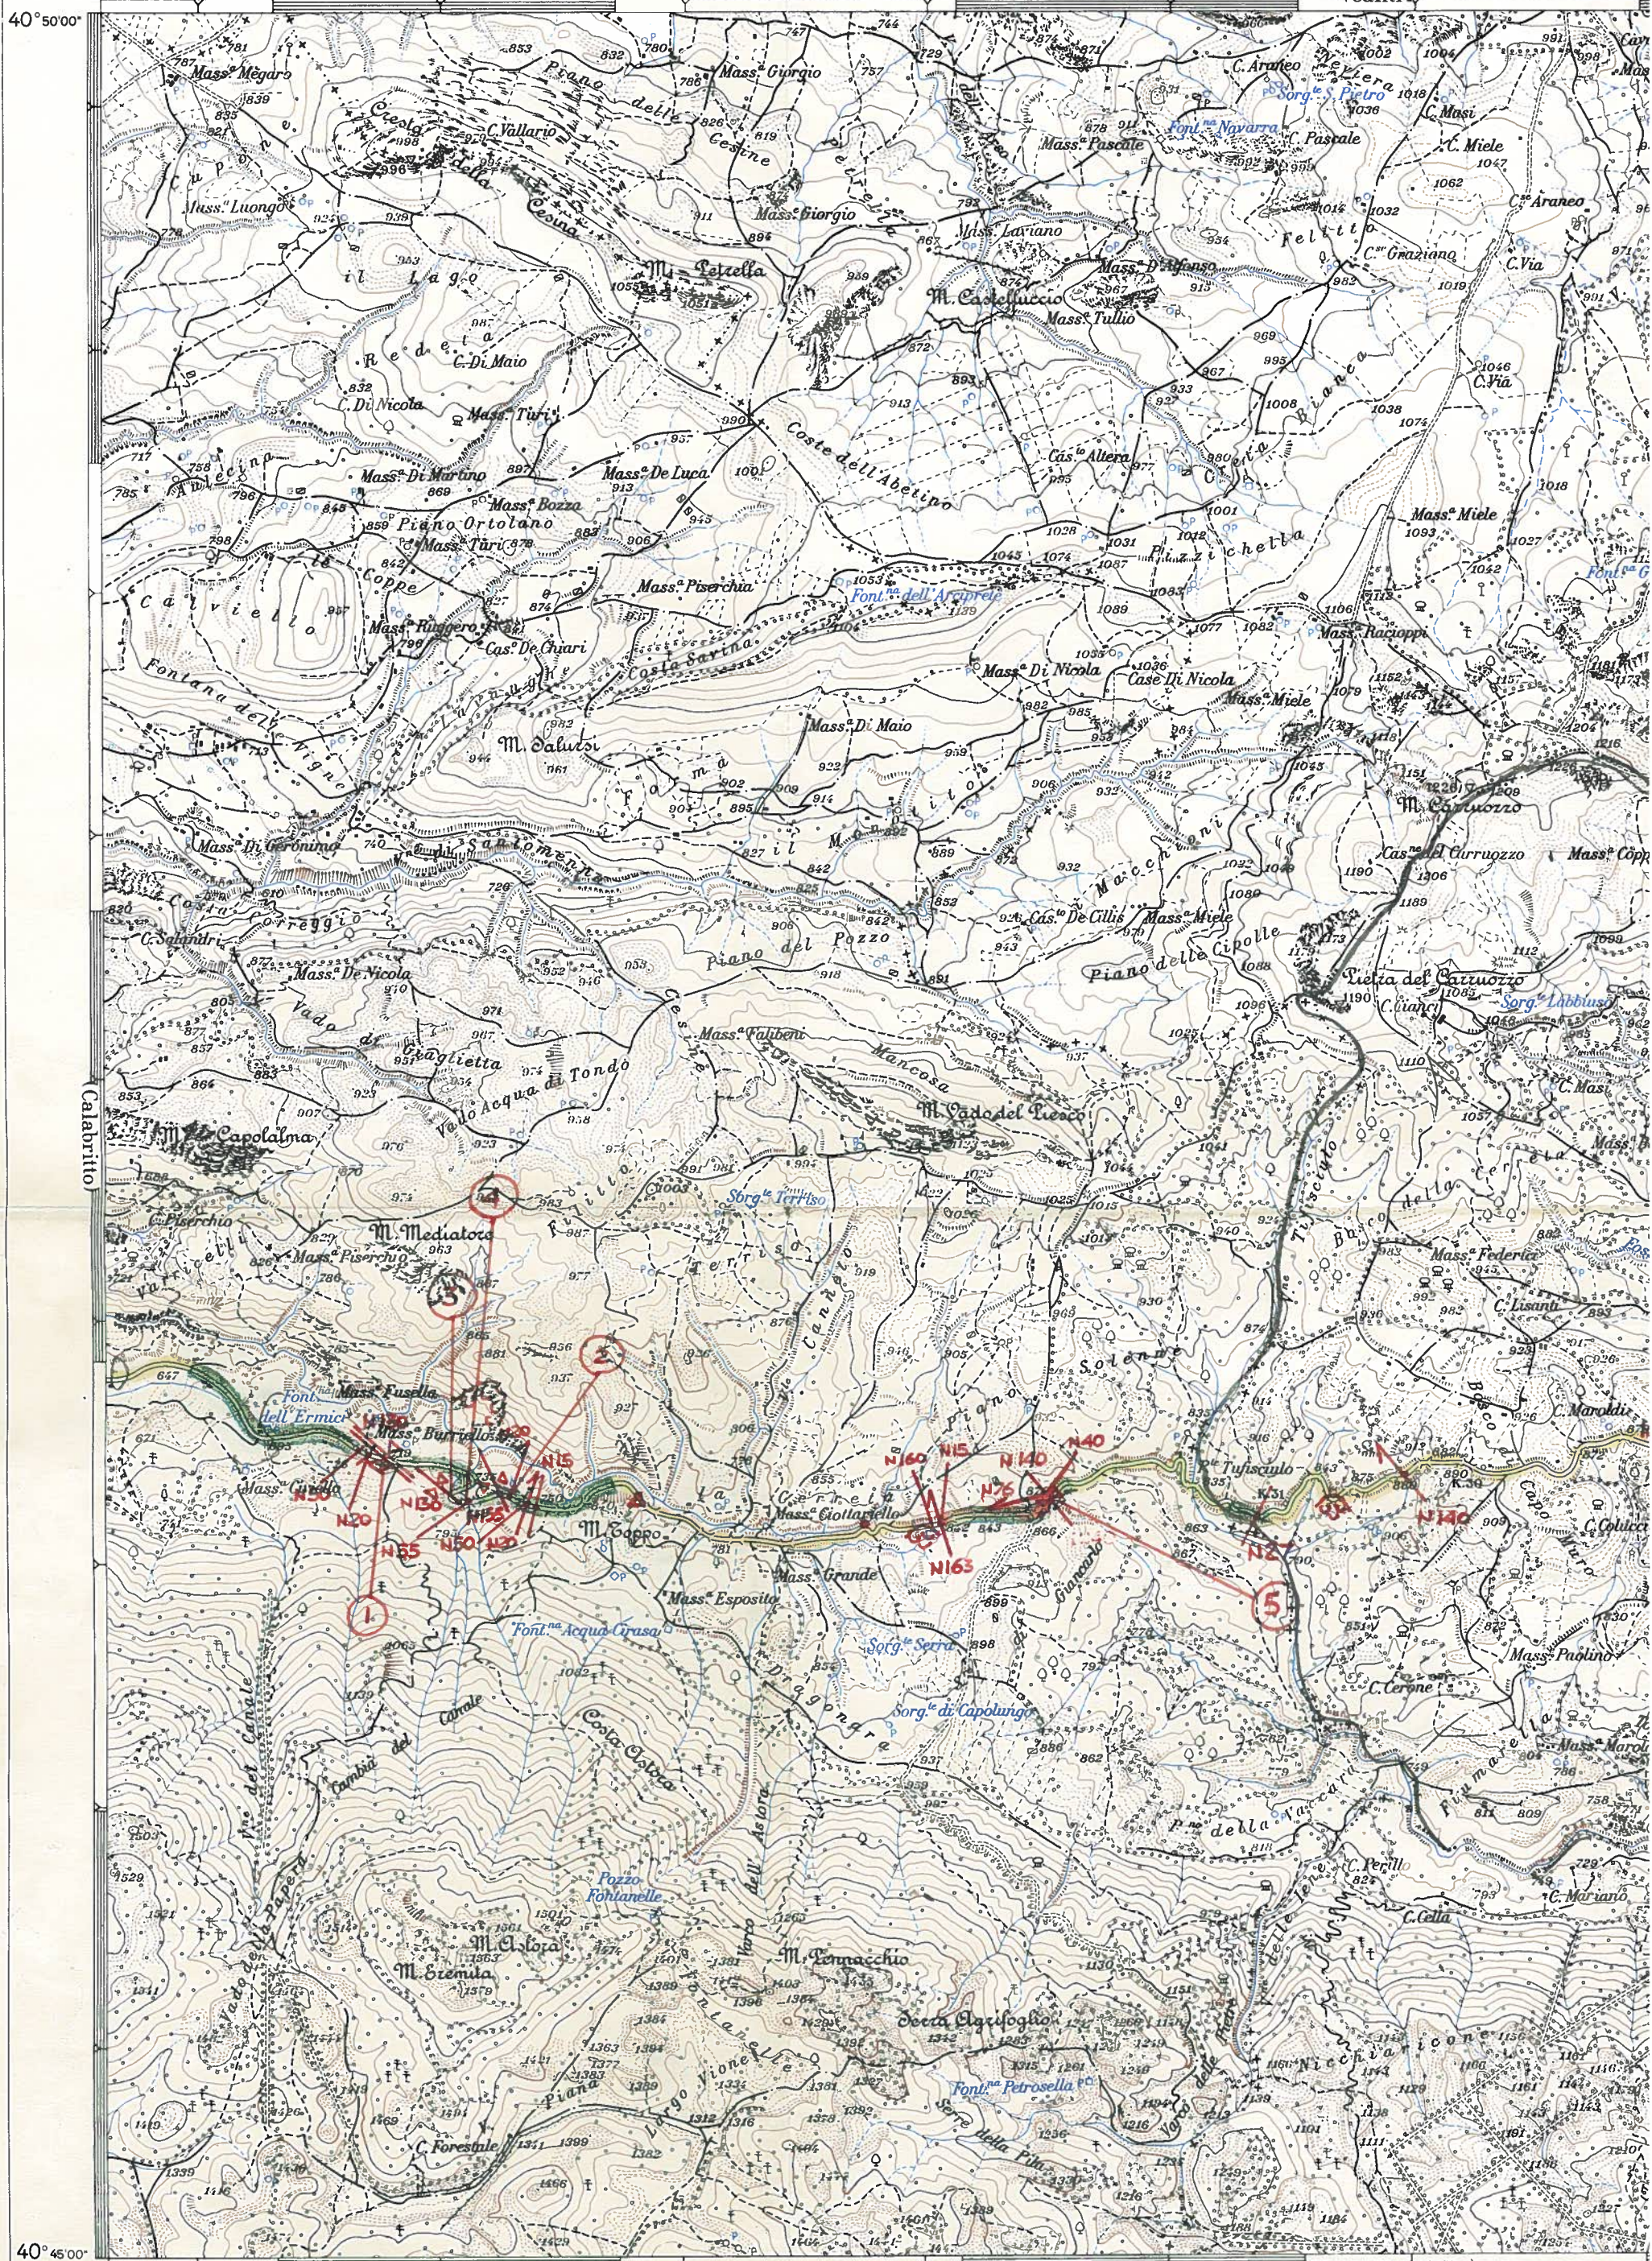



Le coordinate geografiche sono riferite all'Ellissoide  
Internazionale orientato a Roma (M. Mario)

II N. E.

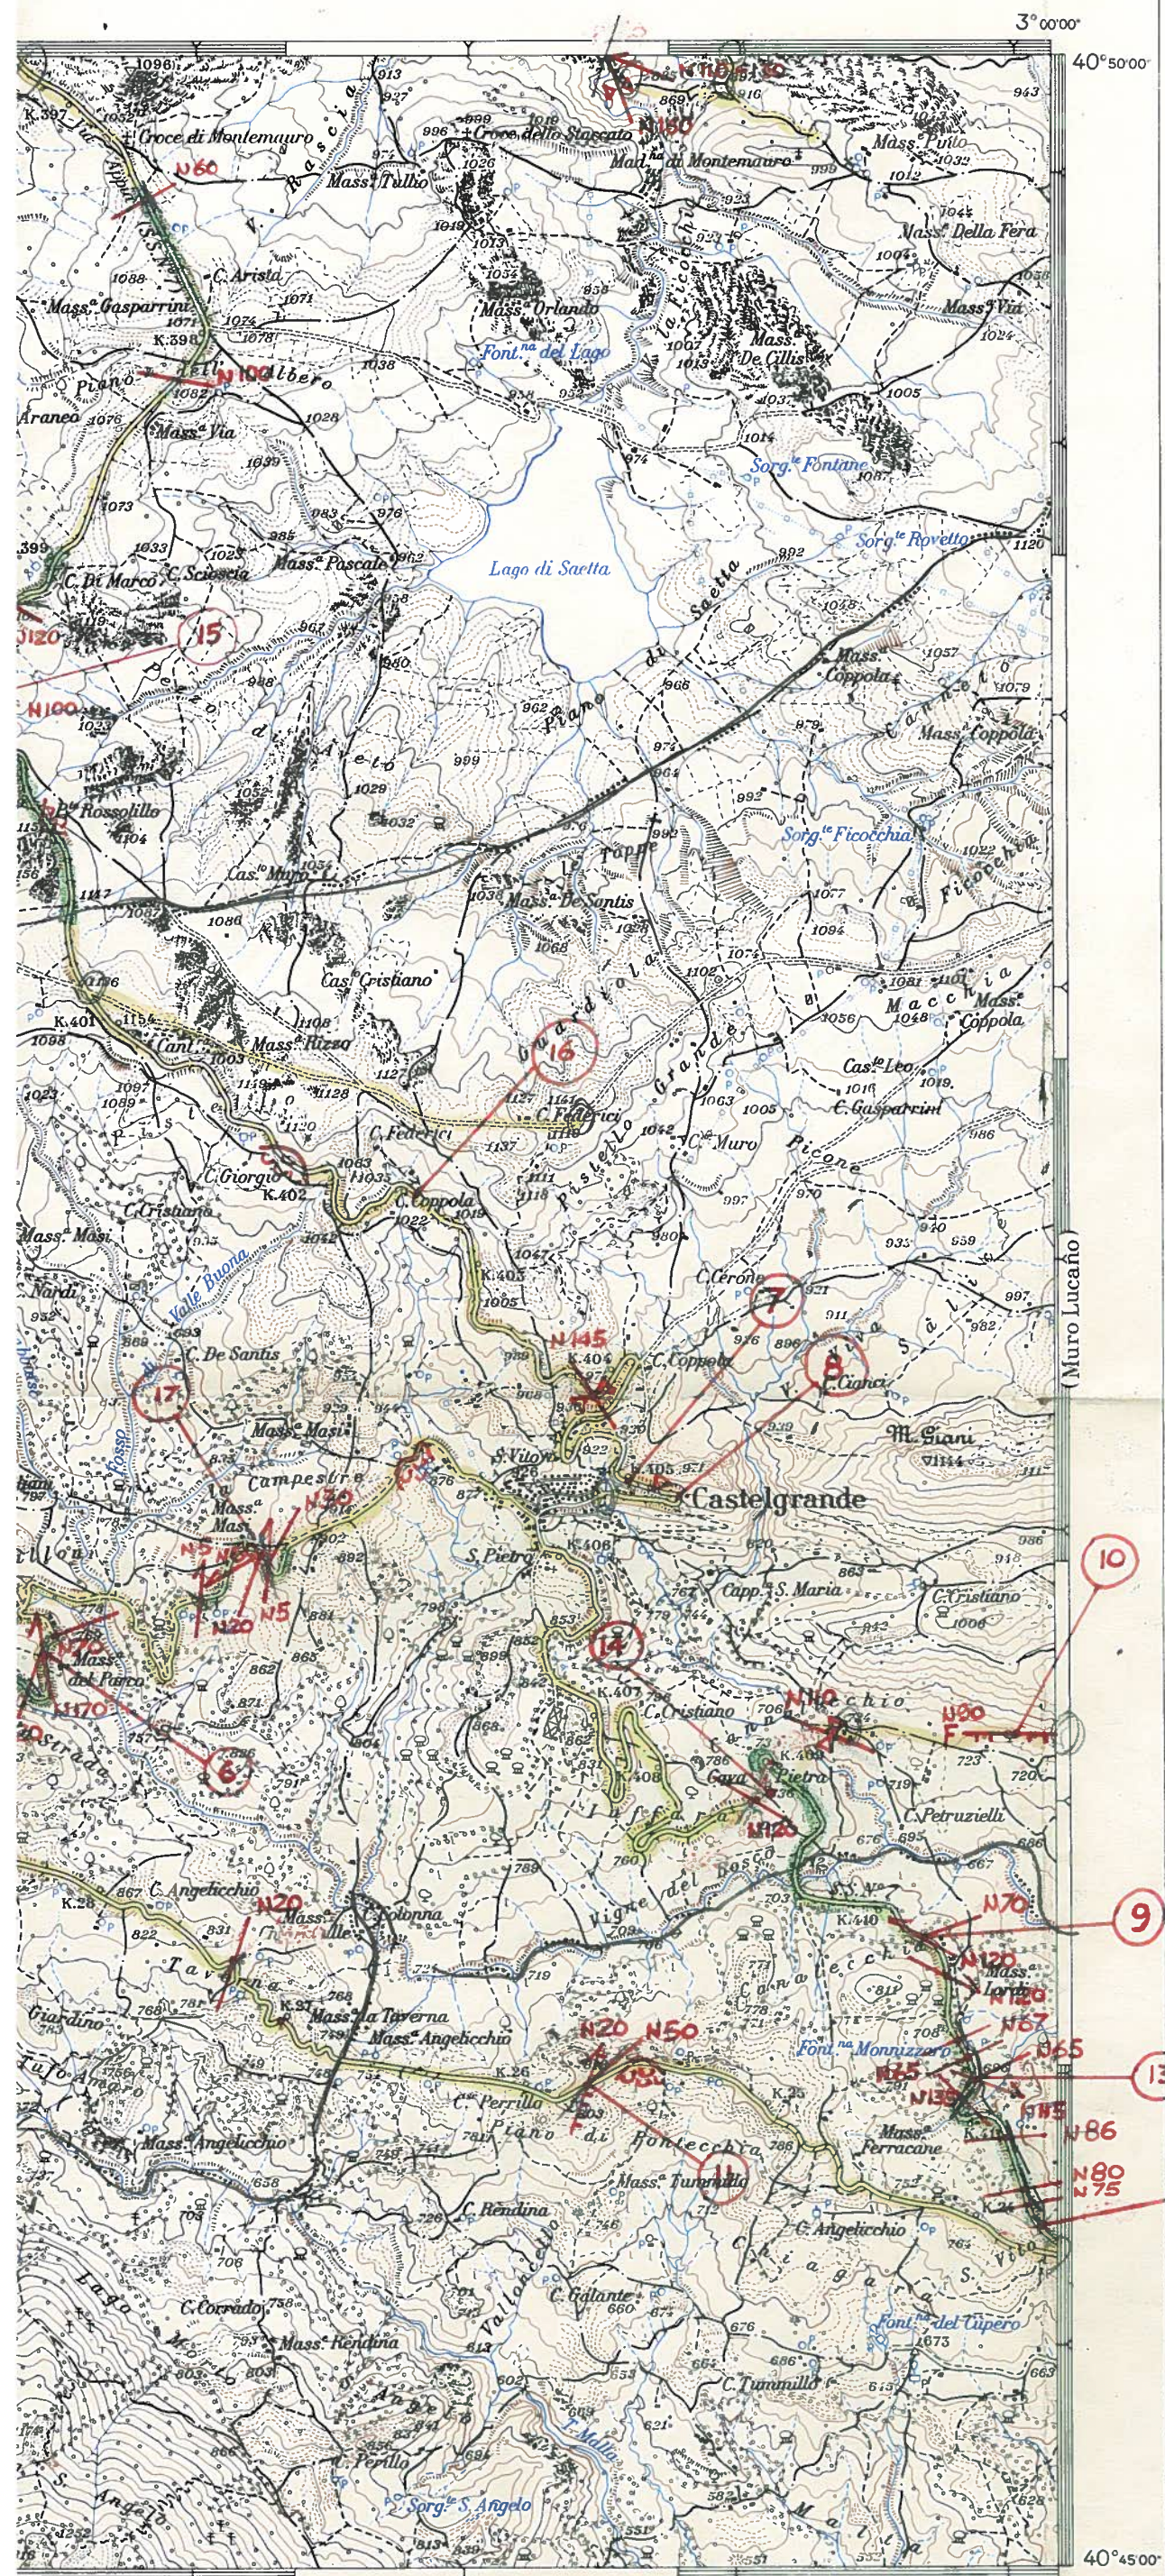

Castelgrande

Le coordinate dei vertici di questa carta nel reticolato italiano (proiezione Gauss-Boaga, ellissoide internazionale, orientamento a M. Mario 1940) sono le seguenti:

FUSO EST

|       |             |       |             |
|-------|-------------|-------|-------------|
| N. O. | E = 2547600 | N. E. | E = 2558139 |
|       | N = 4520386 | N. E. | N = 4520433 |
| S. O. | E = 2547634 | S. E. | E = 2558187 |
|       | N = 4511135 | S. E. | N = 4511182 |

Nelle carte sulle quali è stato tracciato il reticolato italiano, questo è indicato nella cornice con i seguenti segni convenzionali: fuso est — fuso ovest —



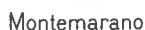

MONTENAPOLI

Longitudine Est dal meridiano di Roma (Monte Mar

2° 30' 00"

(Mirabella Eclano)

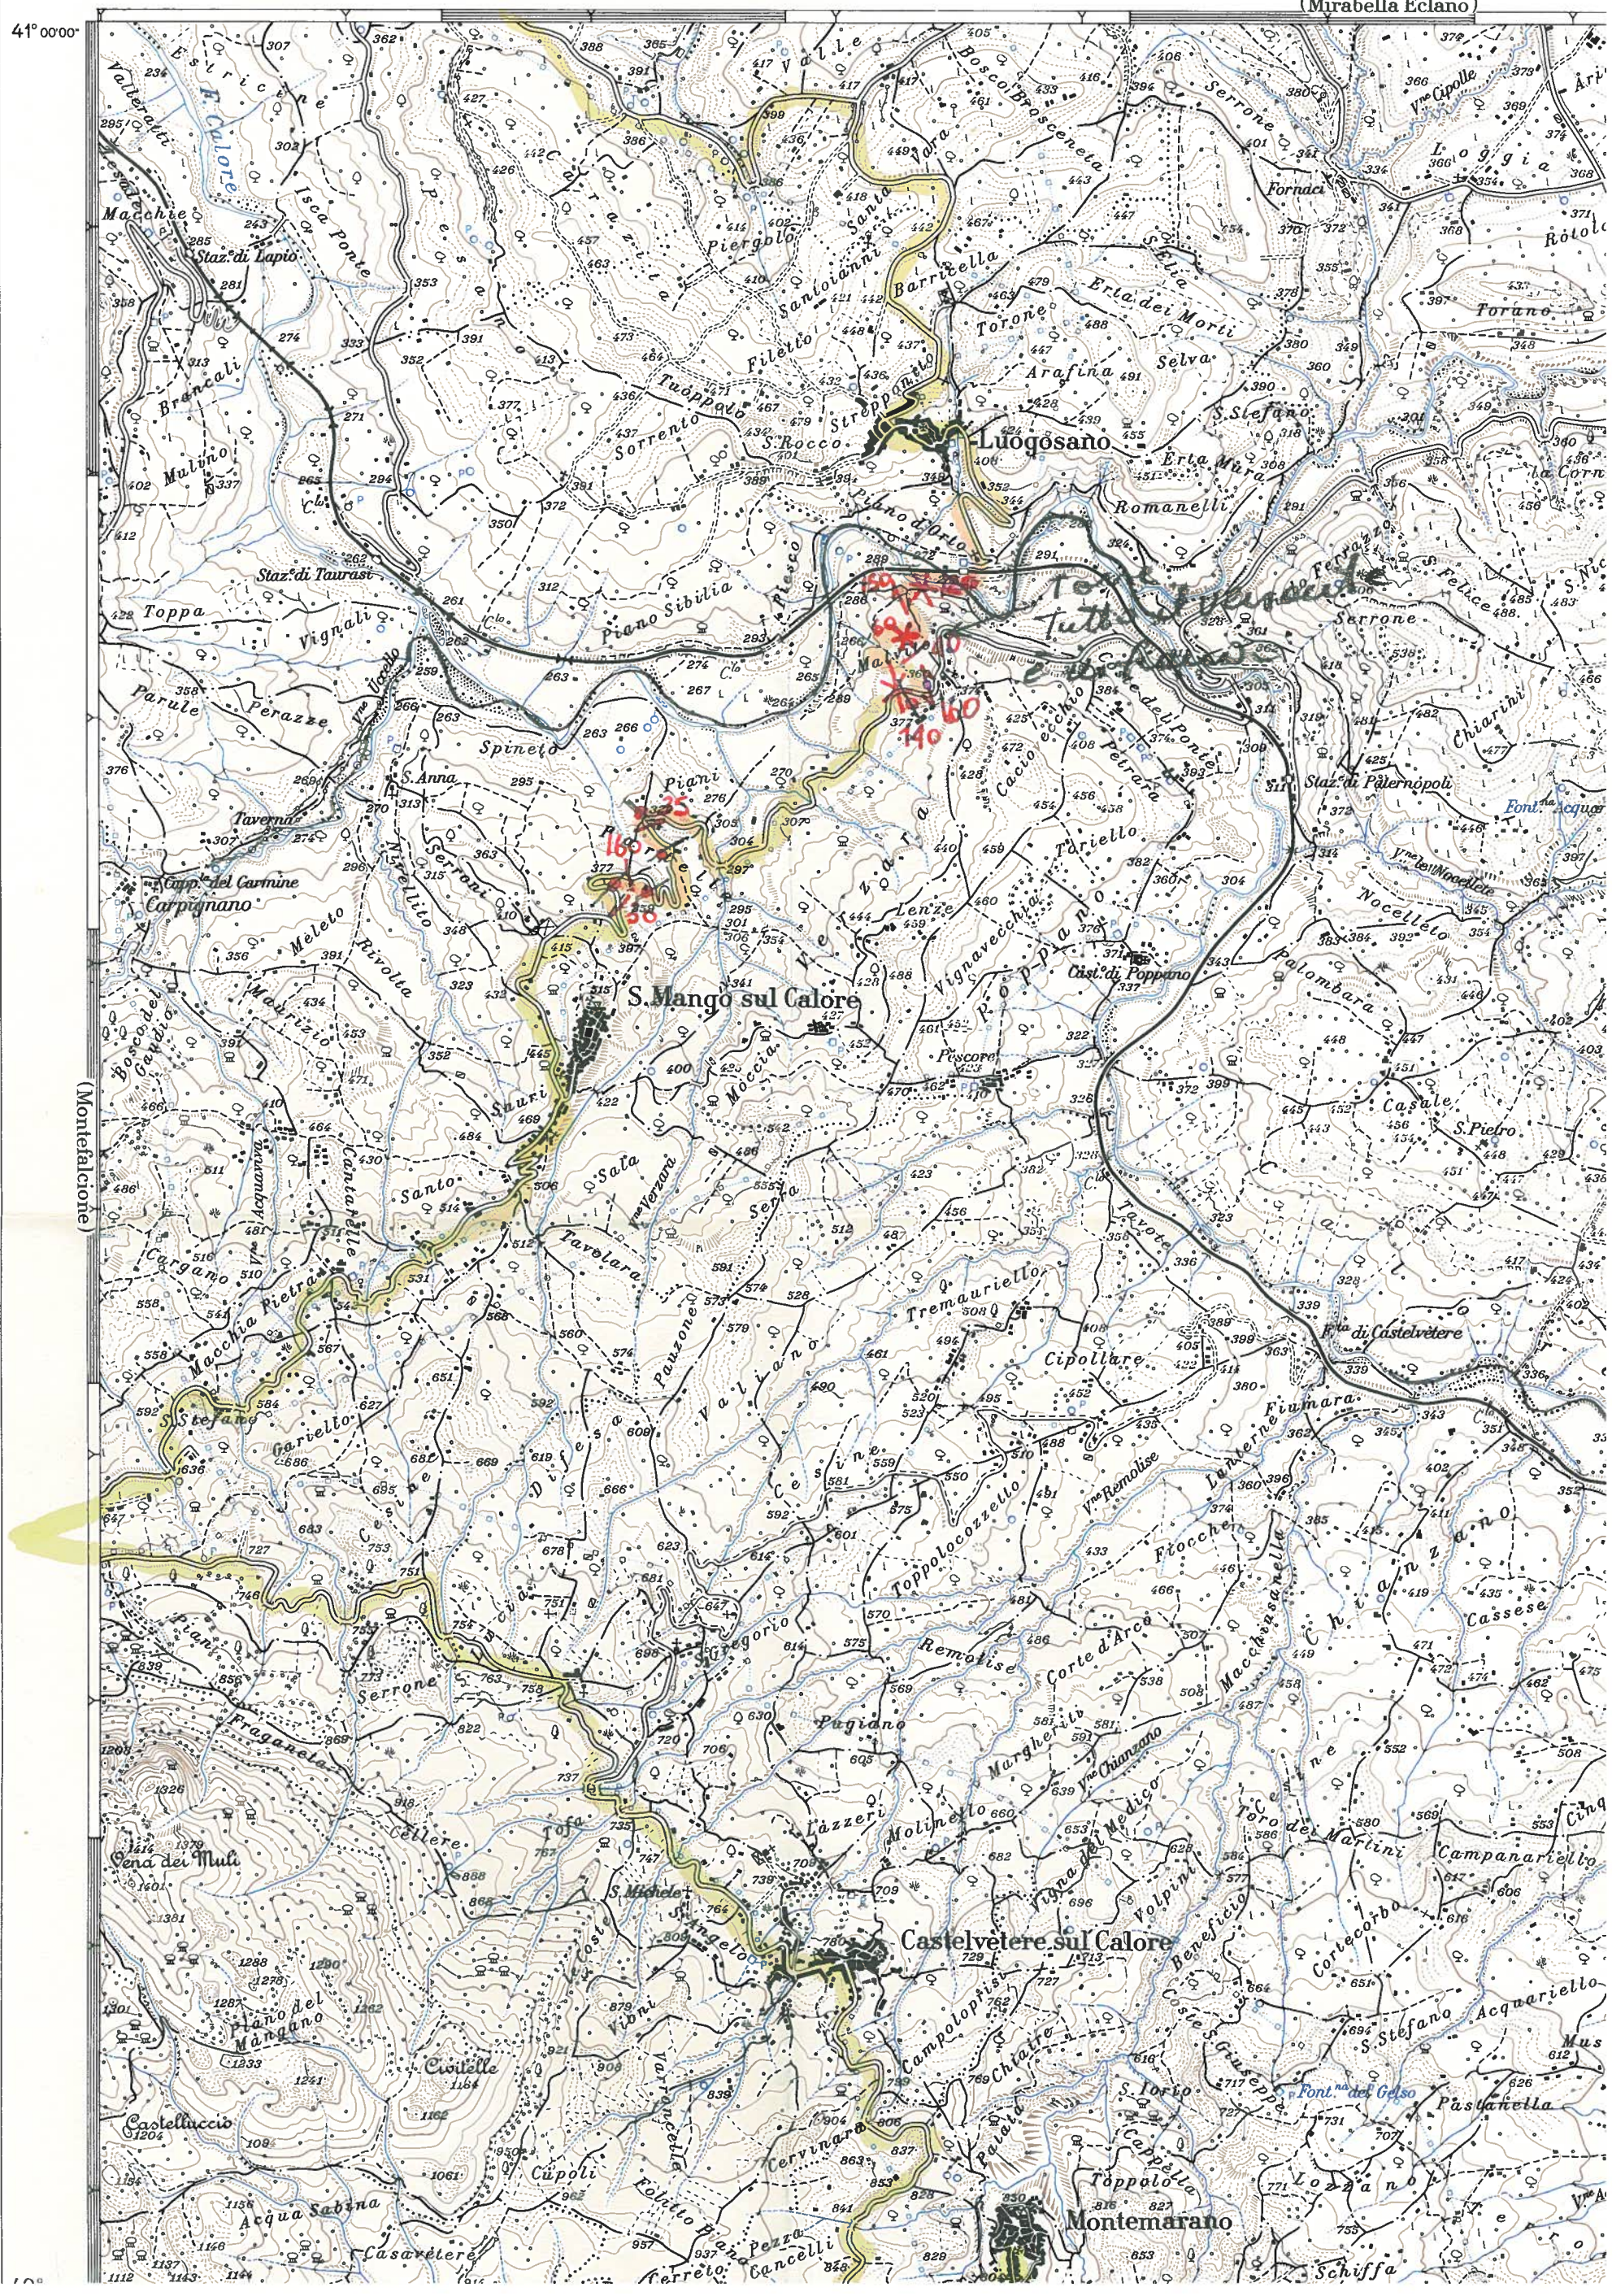



Le coordinate geografiche sono riferite all'Ellissoide  
Internazionale orientato a Roma (M. Mario)

# IV N.O.

2° 37' 30"

41° 00' 00"

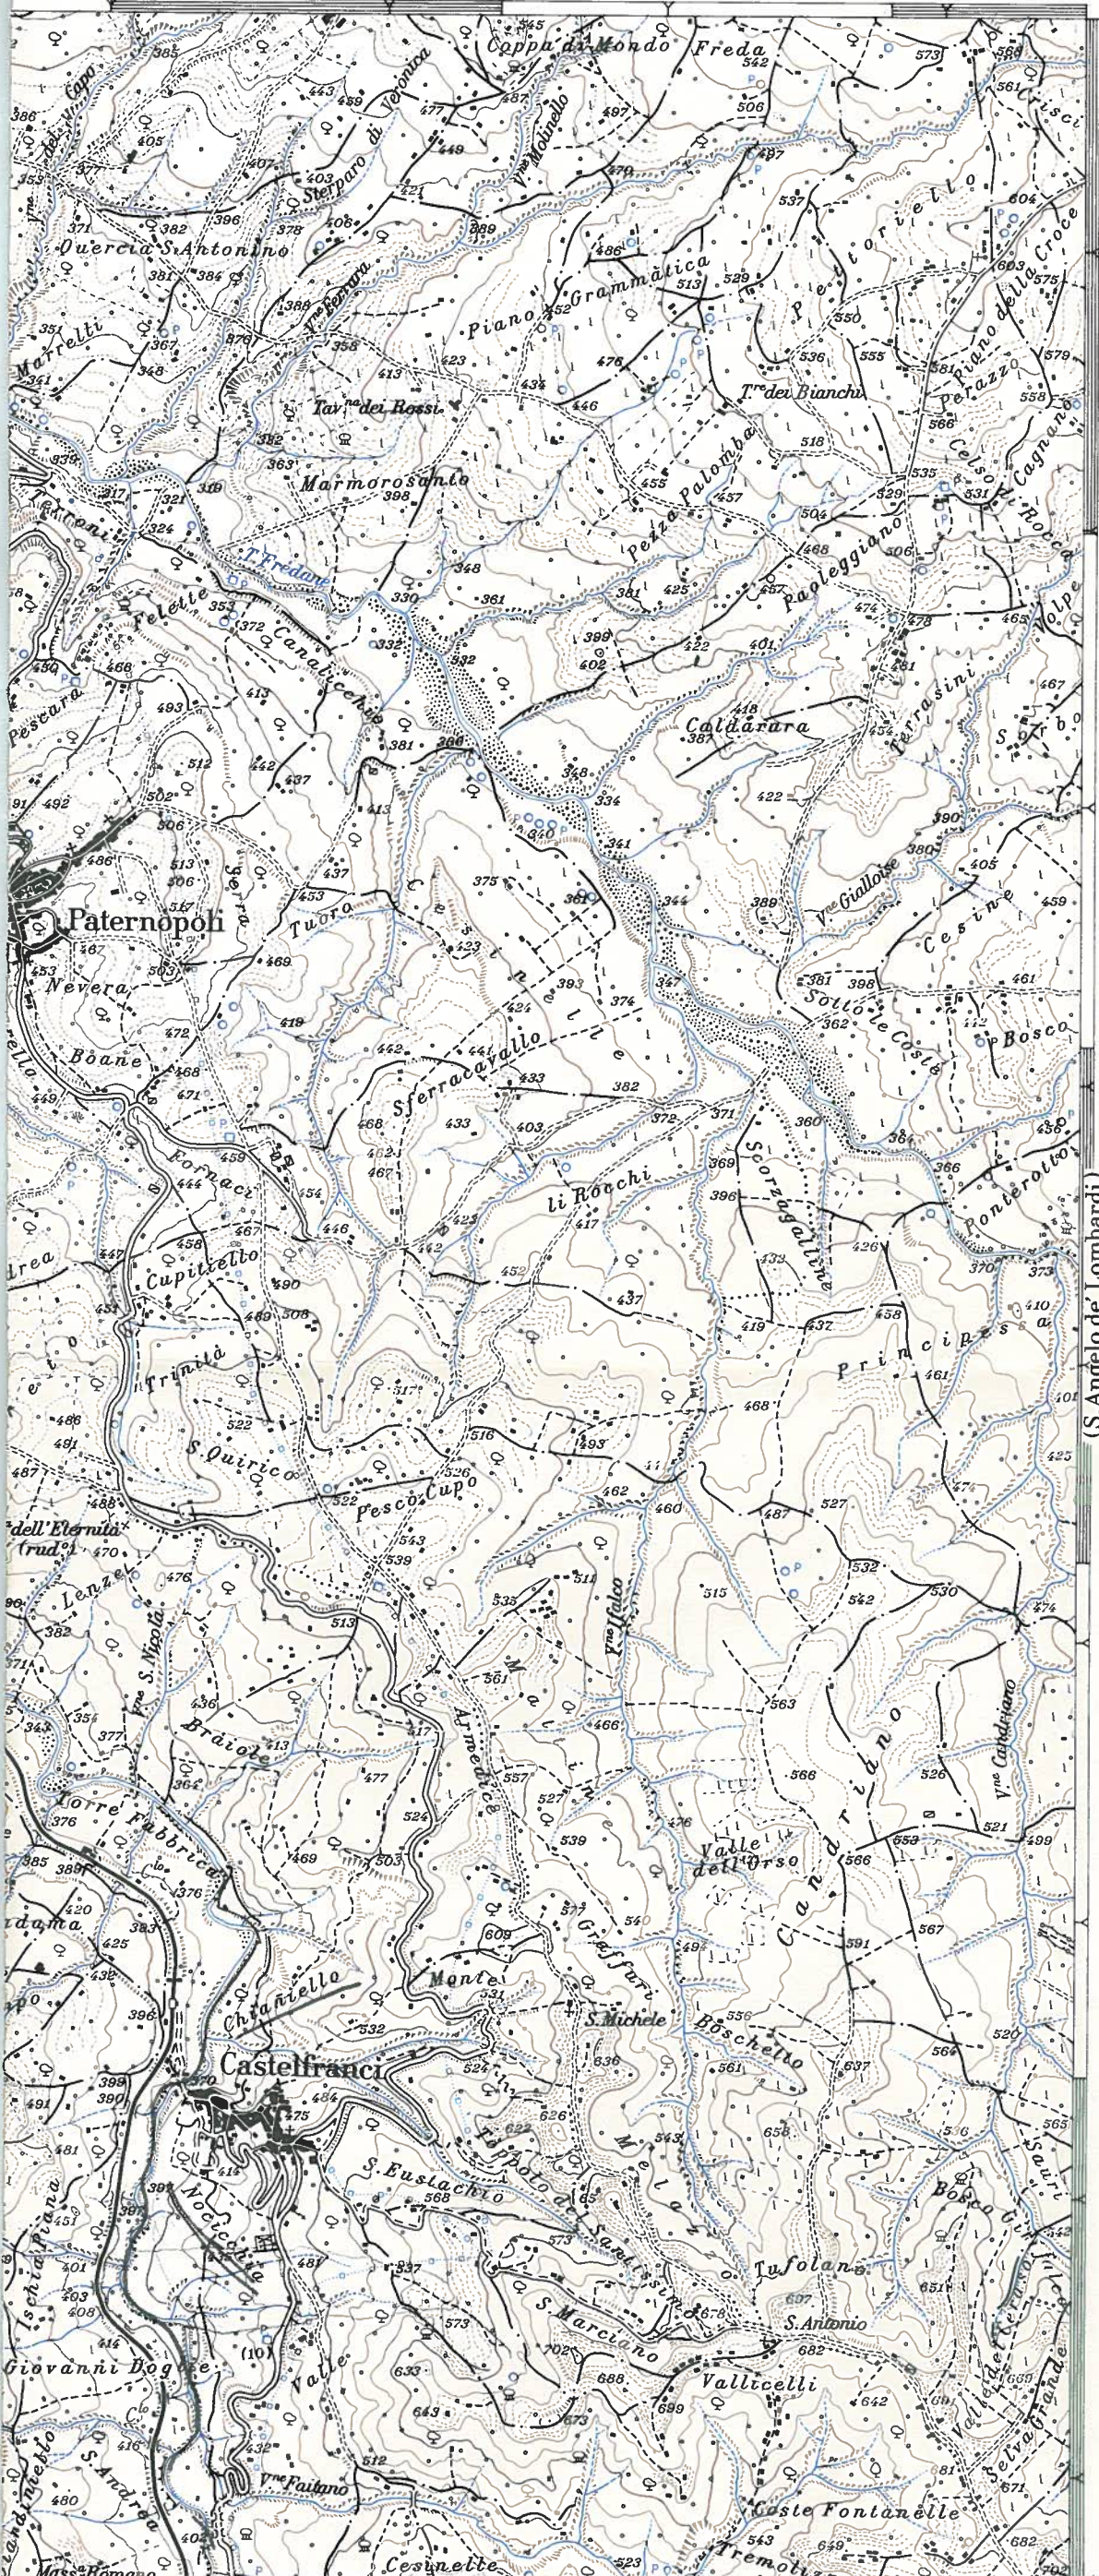

(S. Angelo de' Lombardi)

Le coordinate dei vertici di questa carta nel reticolato italiano (prolezione Gauss-Boaga, ellissoide internazionale, orientamento a M. Mario 1940) sono le seguenti:

## FUSO EST

|       |             |       |             |
|-------|-------------|-------|-------------|
| N. O. | E = 2515991 | N. E. | E = 2526504 |
|       | N = 4538837 |       | N = 4538839 |
| S. O. | E = 2515986 | S. E. | E = 2526512 |
|       | N = 4529586 |       | N = 4529588 |

Nelle carte sulle quali è stato tracciato il reticolato italiano, questo è indicato nella cornice con i seguenti segni convenzionali: fuso est — fuso ovest —



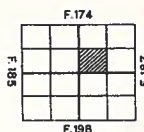

Teora

F° 186 della Carta d'Italia

TEORA

Longitudine Est dal meridiano di Roma (Monte Mario)

2° 45' 00"

40° 55' 00"

(Andretta)

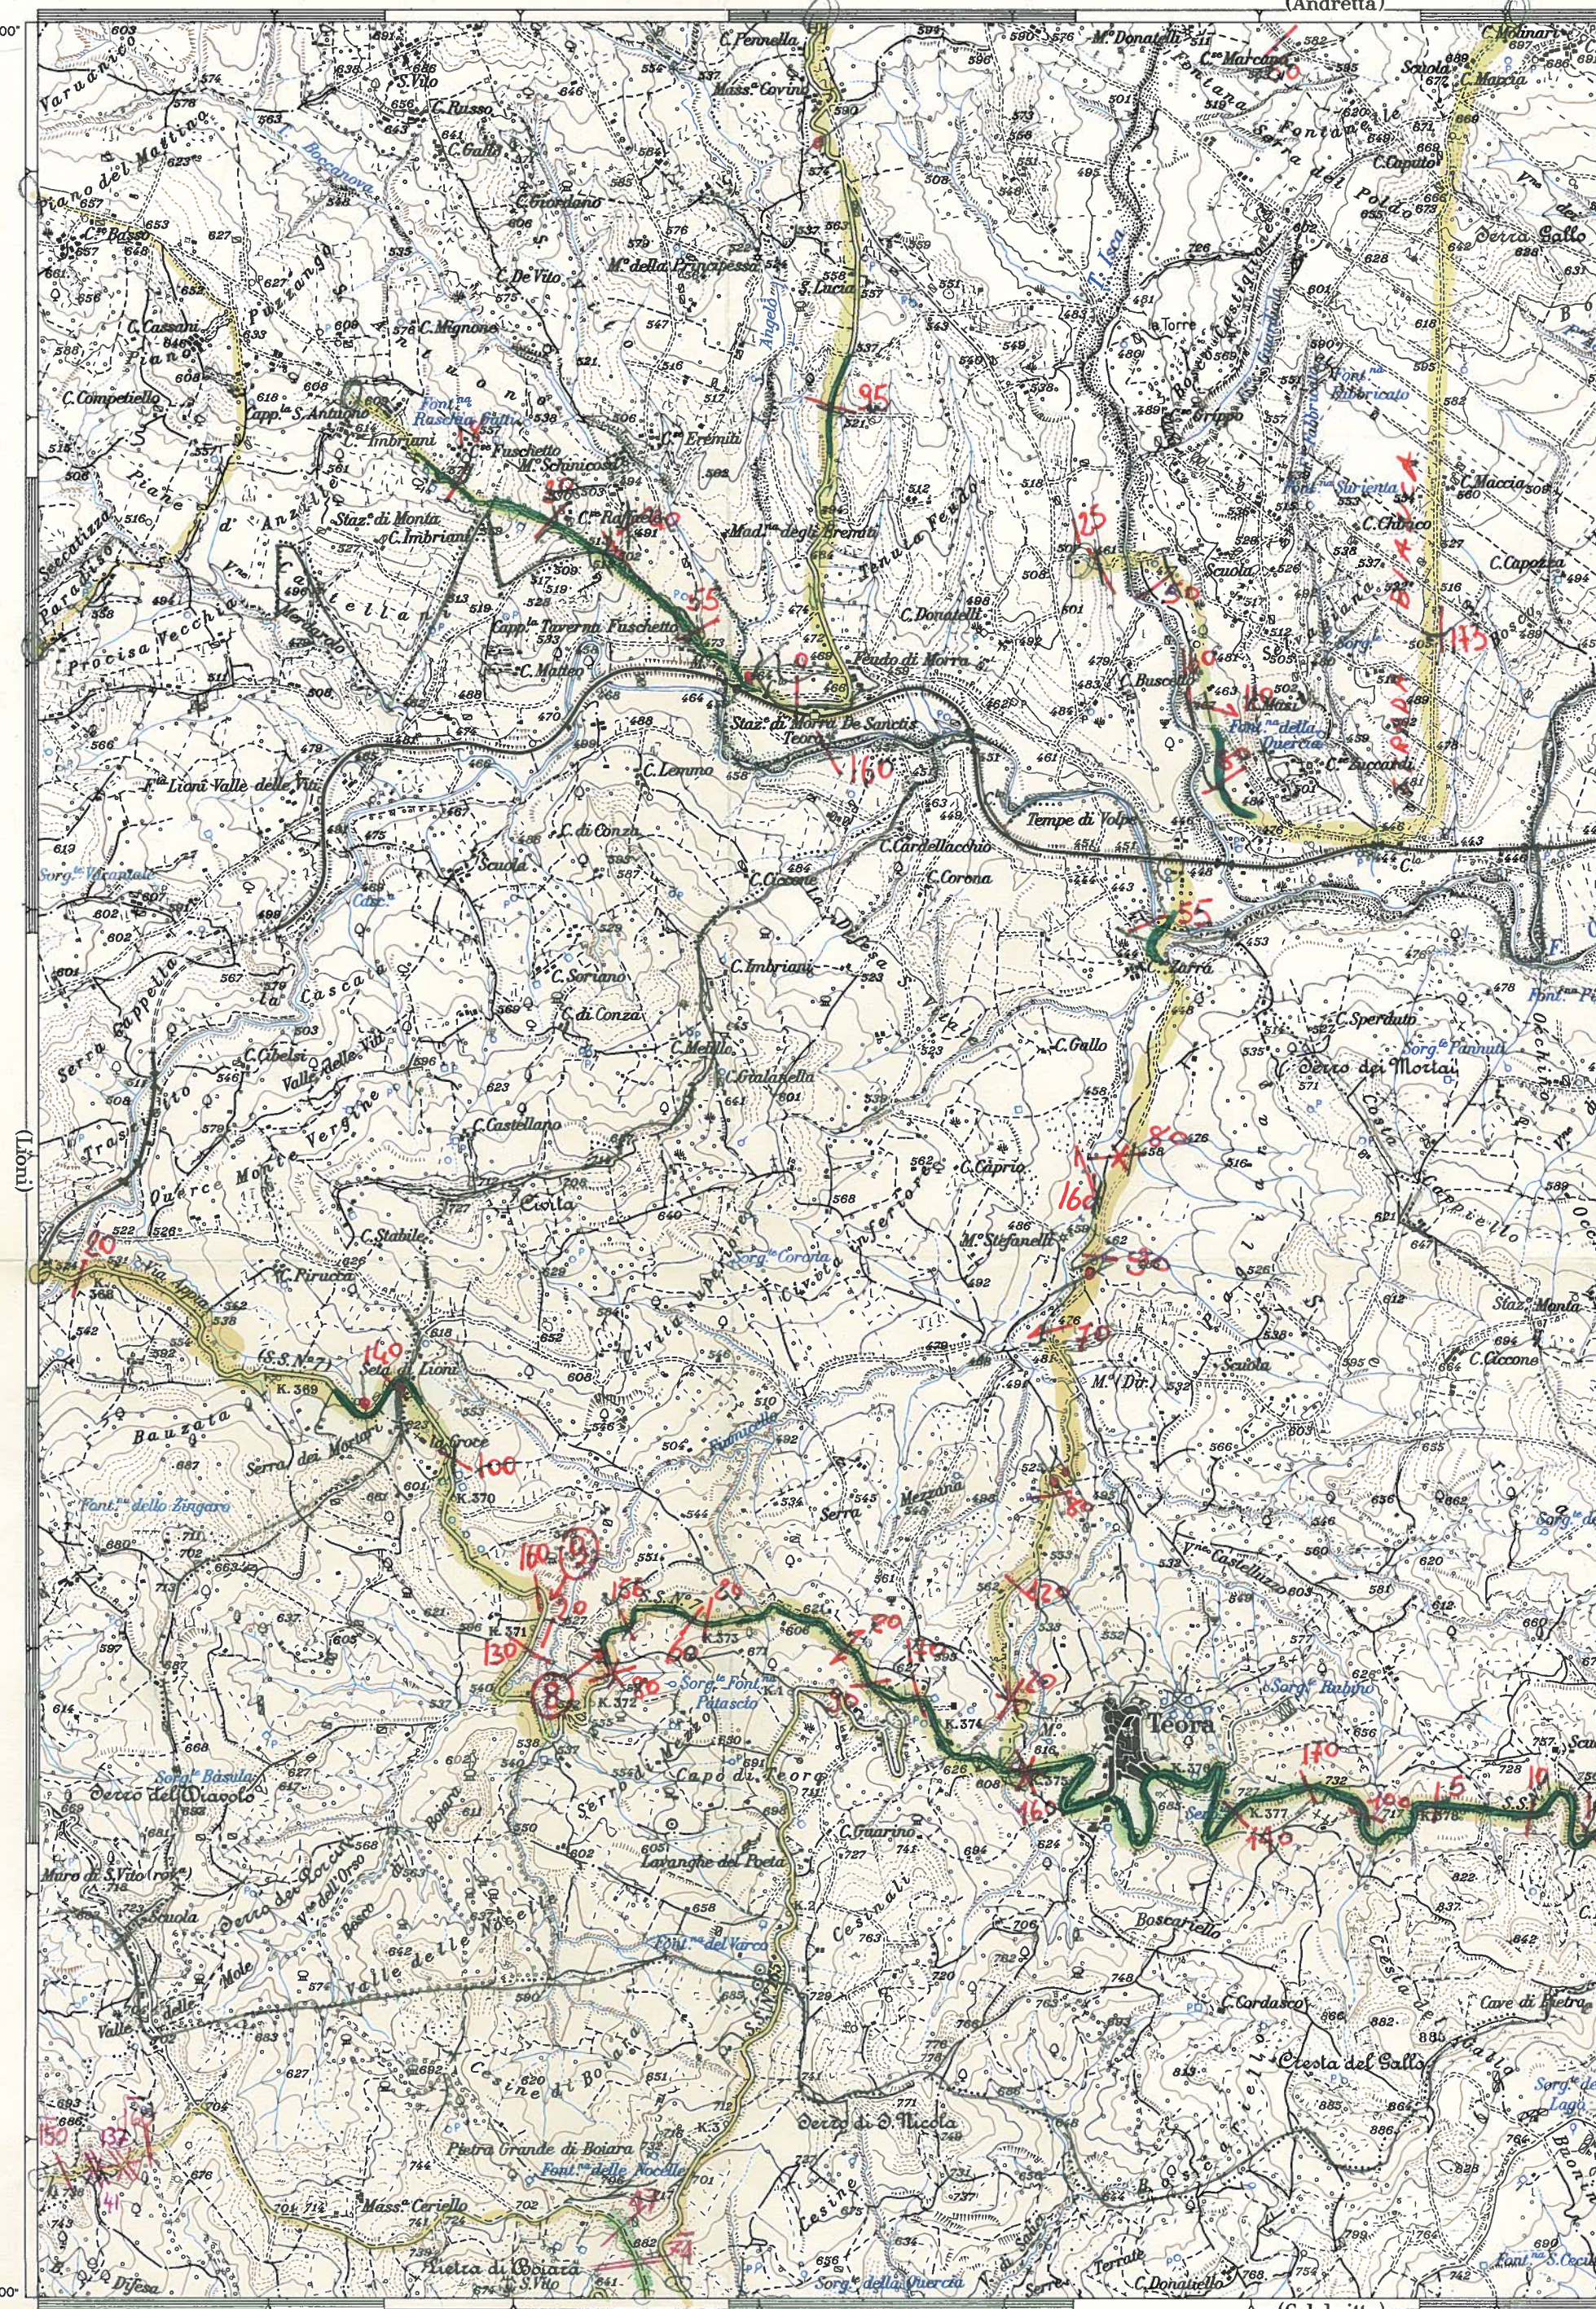

40° 50' 00"

2° 45' 00"

(Calabritto)



Le coordinate geografiche sono riferite all'Ellissoide  
Internazionale orientato a Roma (M. Mario)

I. S. O.

2° 52' 30"

40° 55' 00"

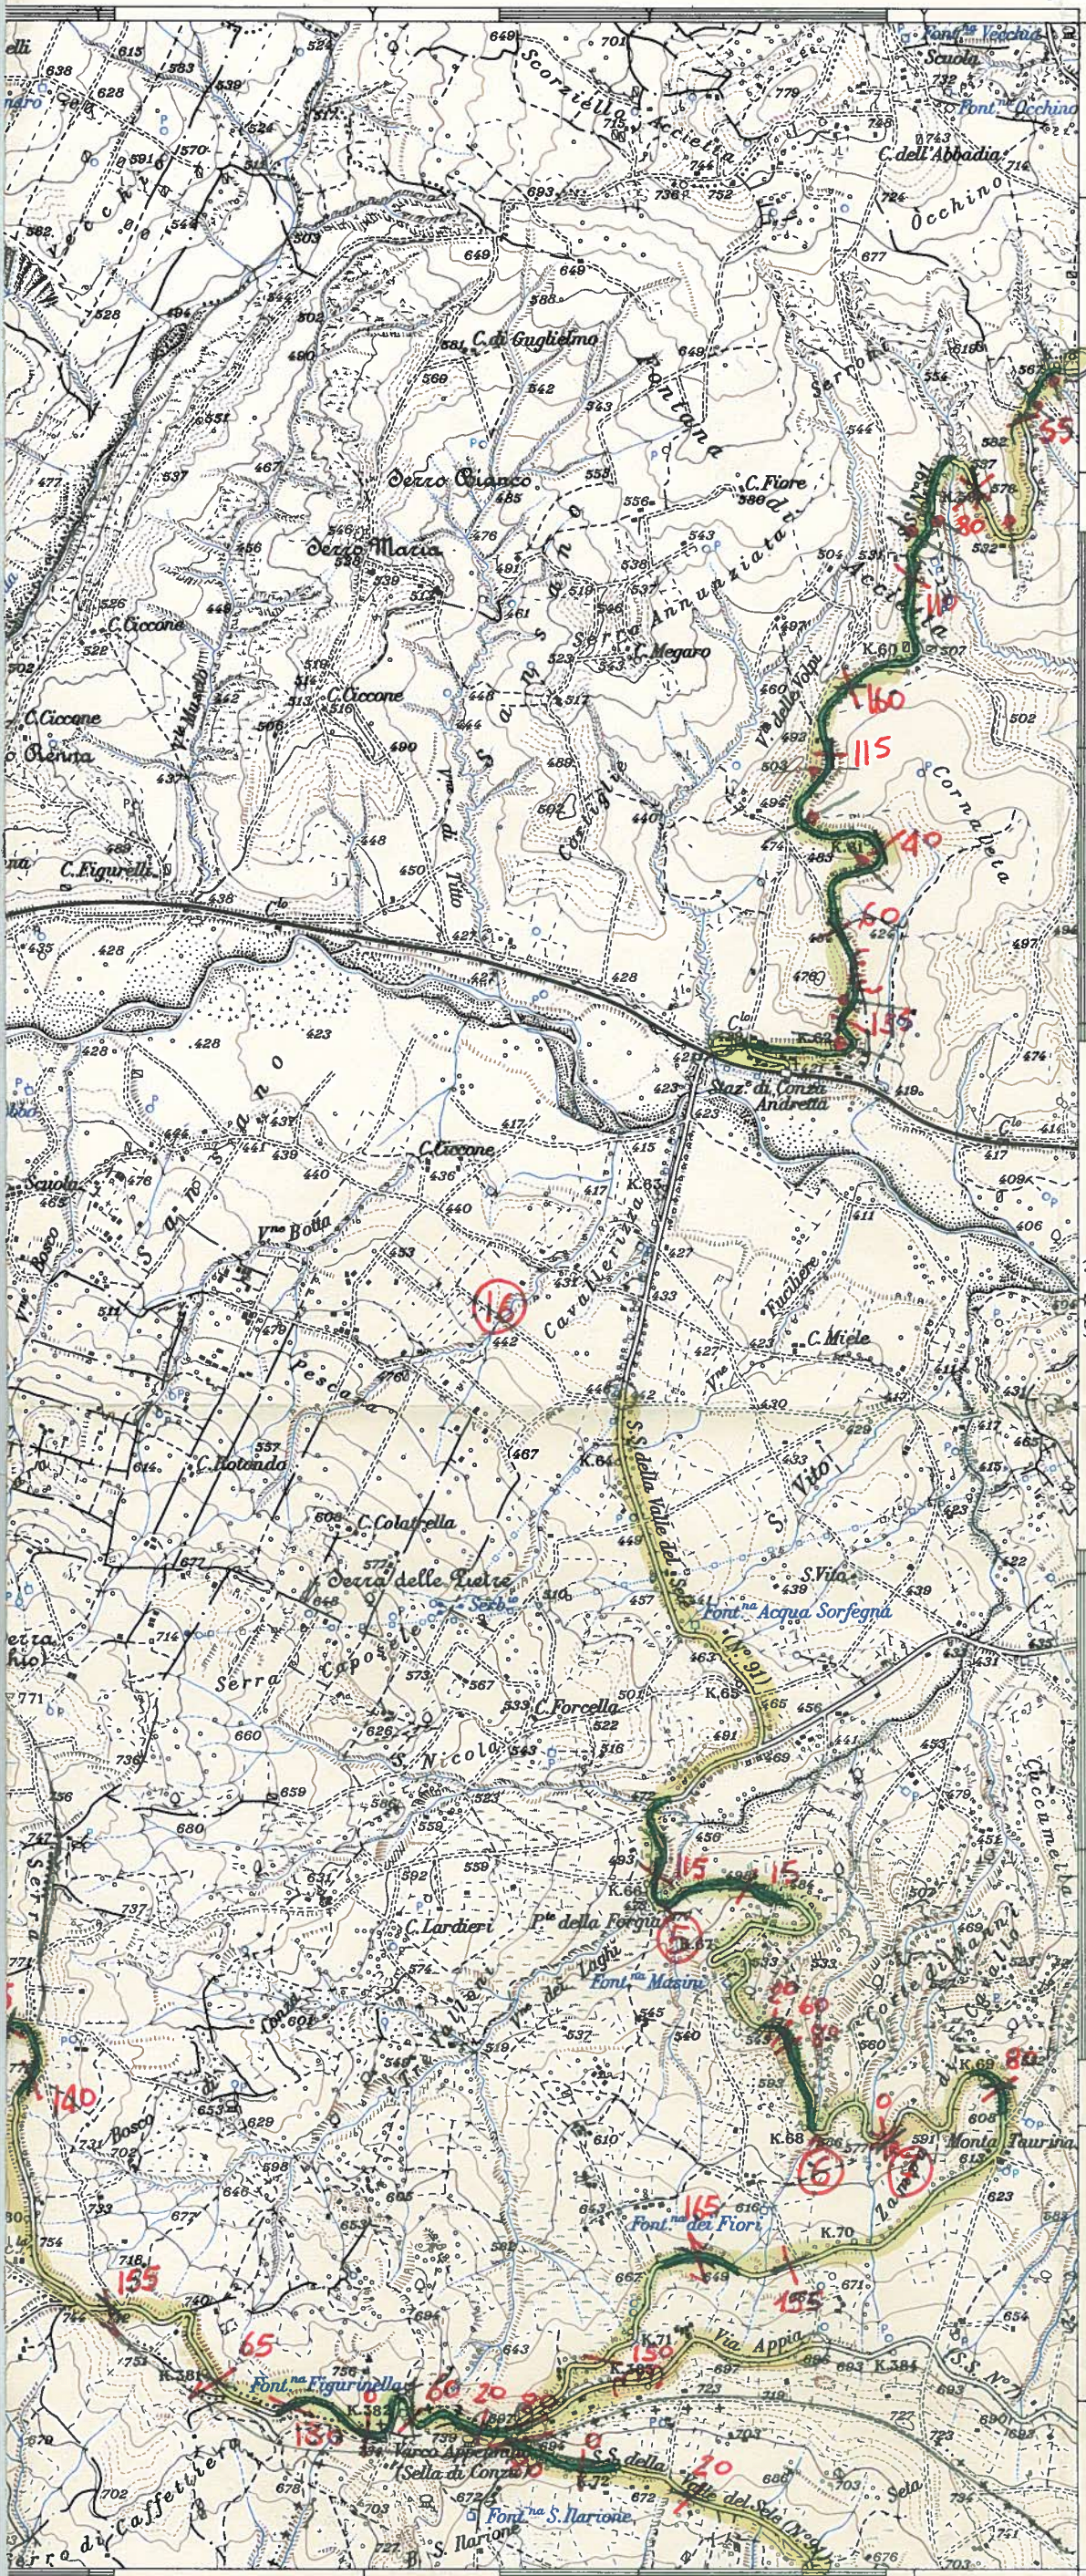

(Calitri)

Le coordinate dei vertici di questa carta nel reticolato italiano (proiezione Gauss-Boaga, ellissoide internazionale, orientamento a M. Mario (1940) sono le seguenti:

FUSO EST

|       |                            |       |                            |
|-------|----------------------------|-------|----------------------------|
| N. O. | E = 2537039<br>N = 4529605 | N. E. | E = 2547565<br>N = 4529637 |
| S. O. | E = 2537060<br>N = 4520354 | S. E. | E = 2547600<br>N = 4520386 |

Nelle carte sulle quali è stato tracciato il reticolato italiano, questo è indicato nella cornice con i seguenti segni convenzionali: fuso est — , fuso ovest —

4

40° 50' 00"

2° 52' 30"



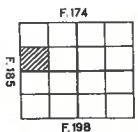

Montella

# F.186 della Carta d'Italia

# MONTELLA

Longitudine Est dal meridiano di Roma (Monte Ma

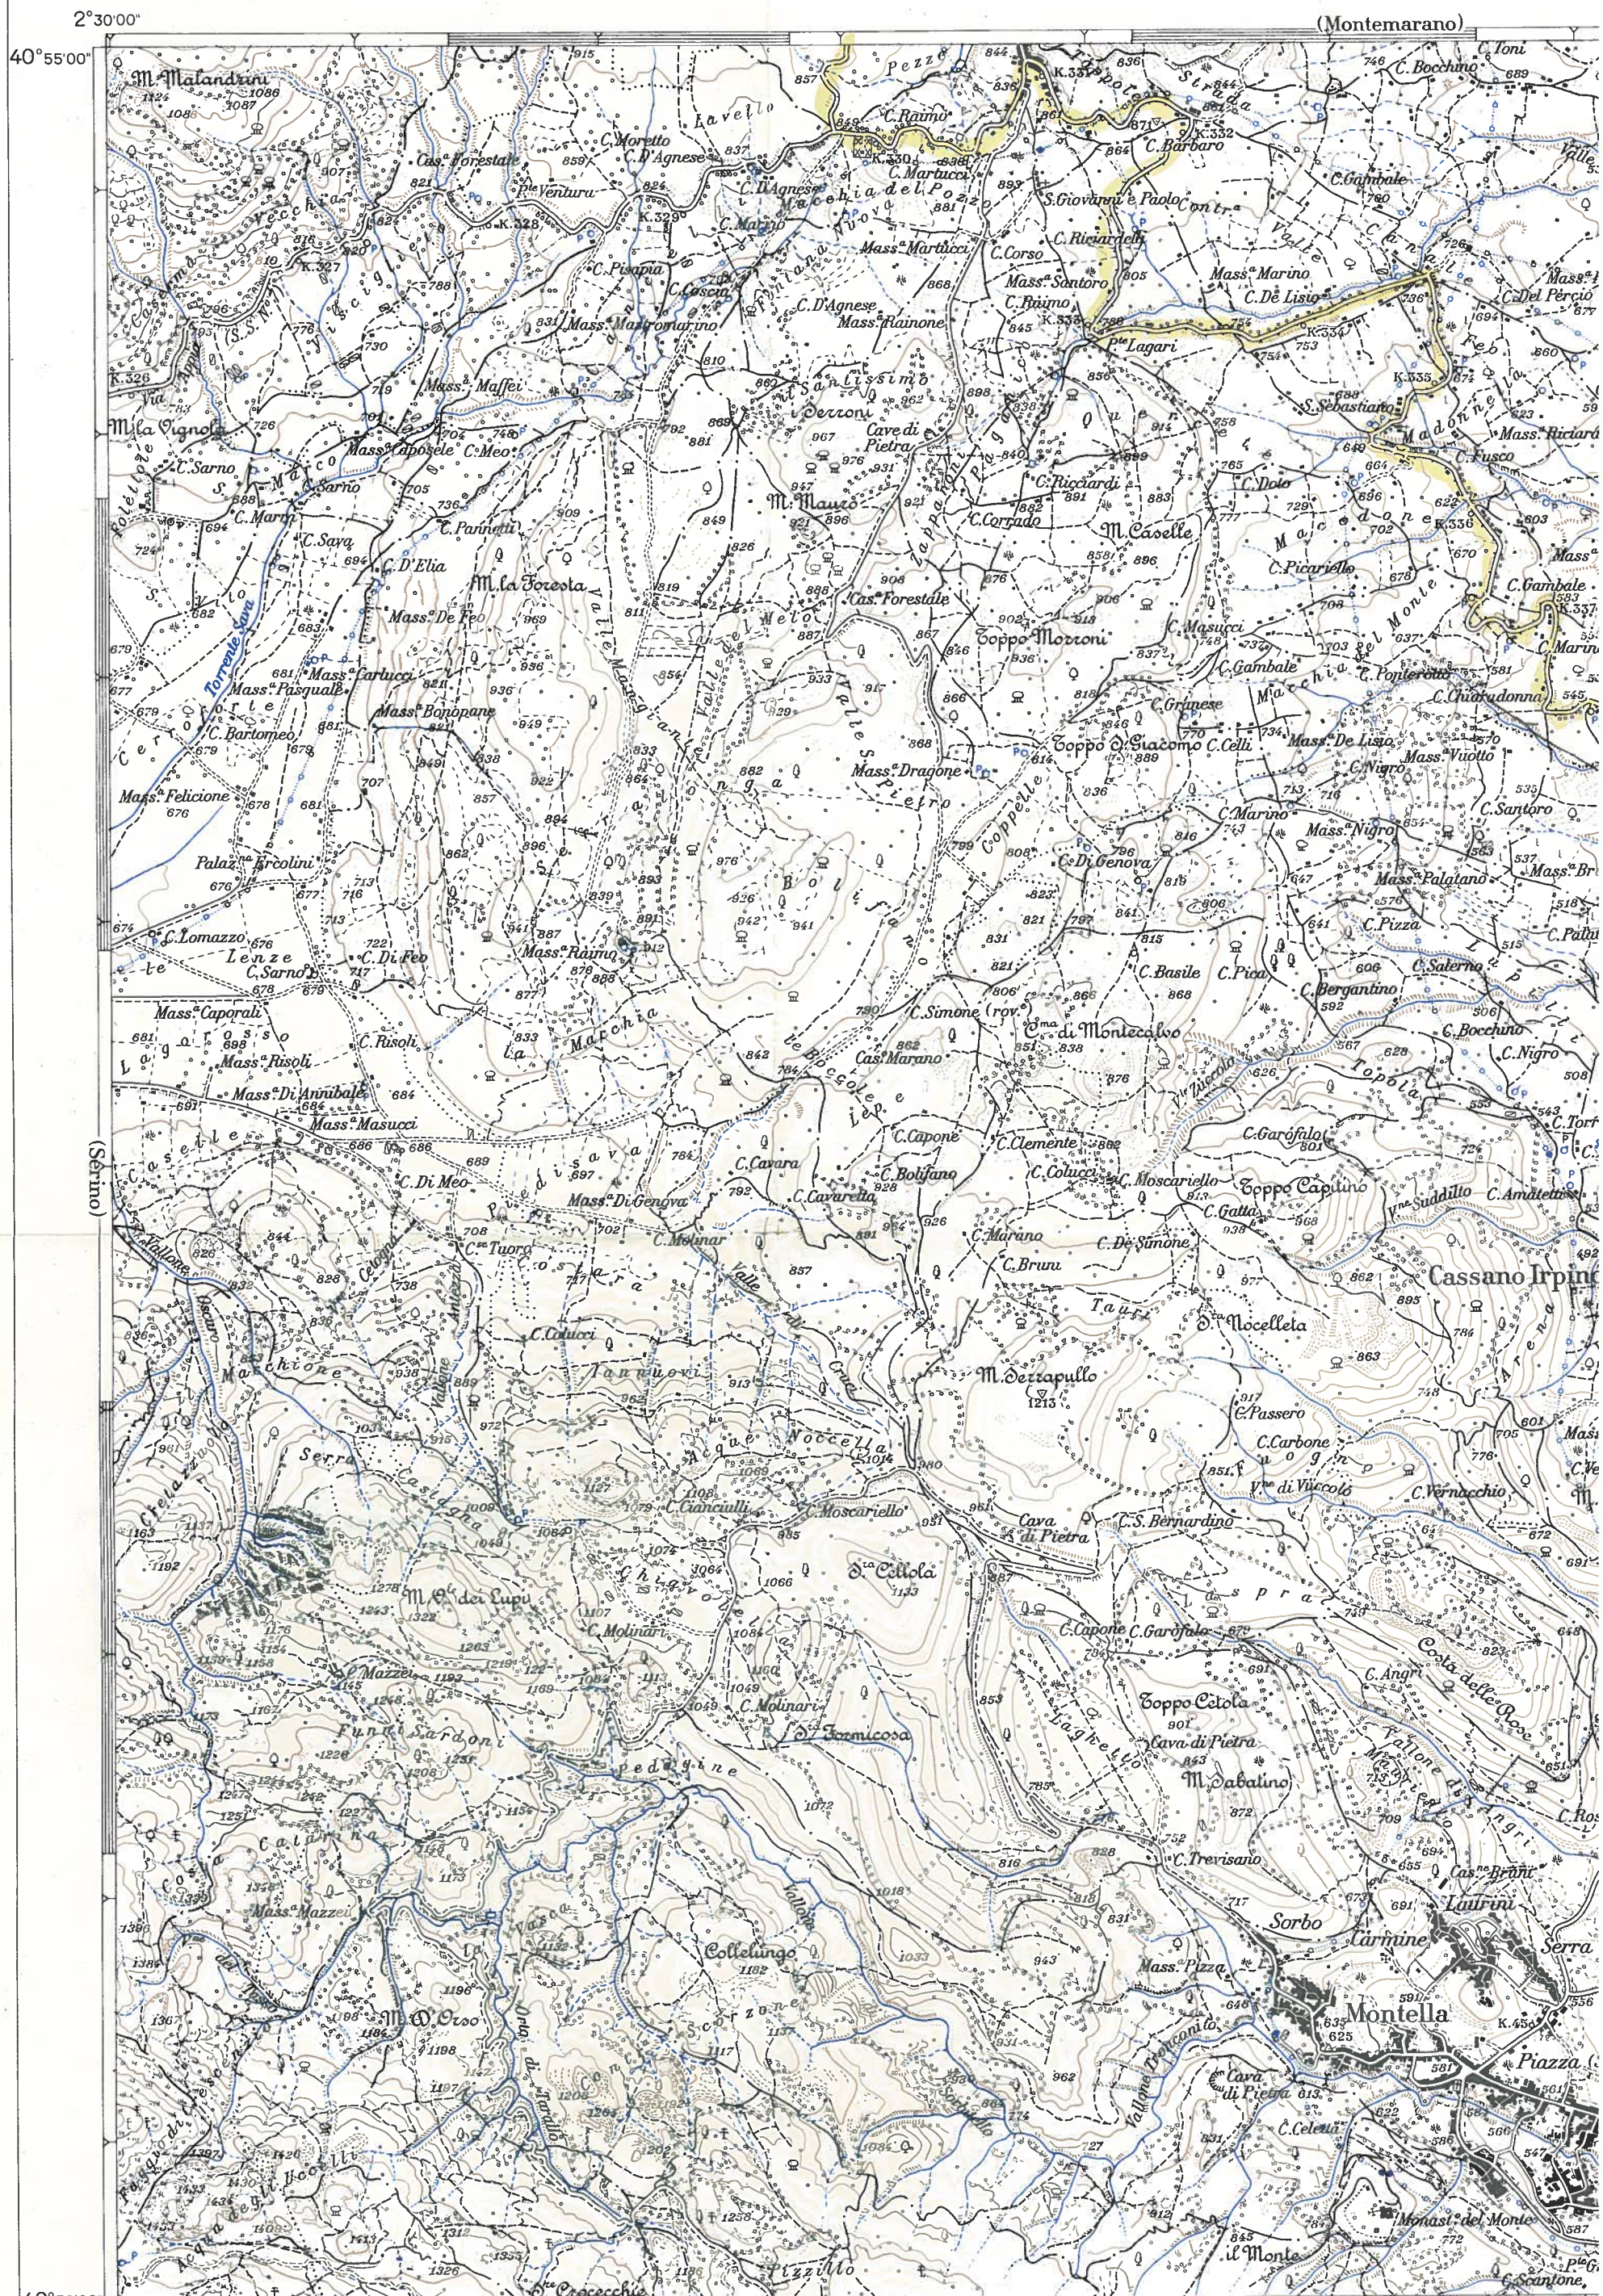



Le coordinate geografiche sono riferite all'Ellissoide  
Internazionale orientato a Roma (M. Mario)

# IV S. O.

2°37'30"

40°55'00"

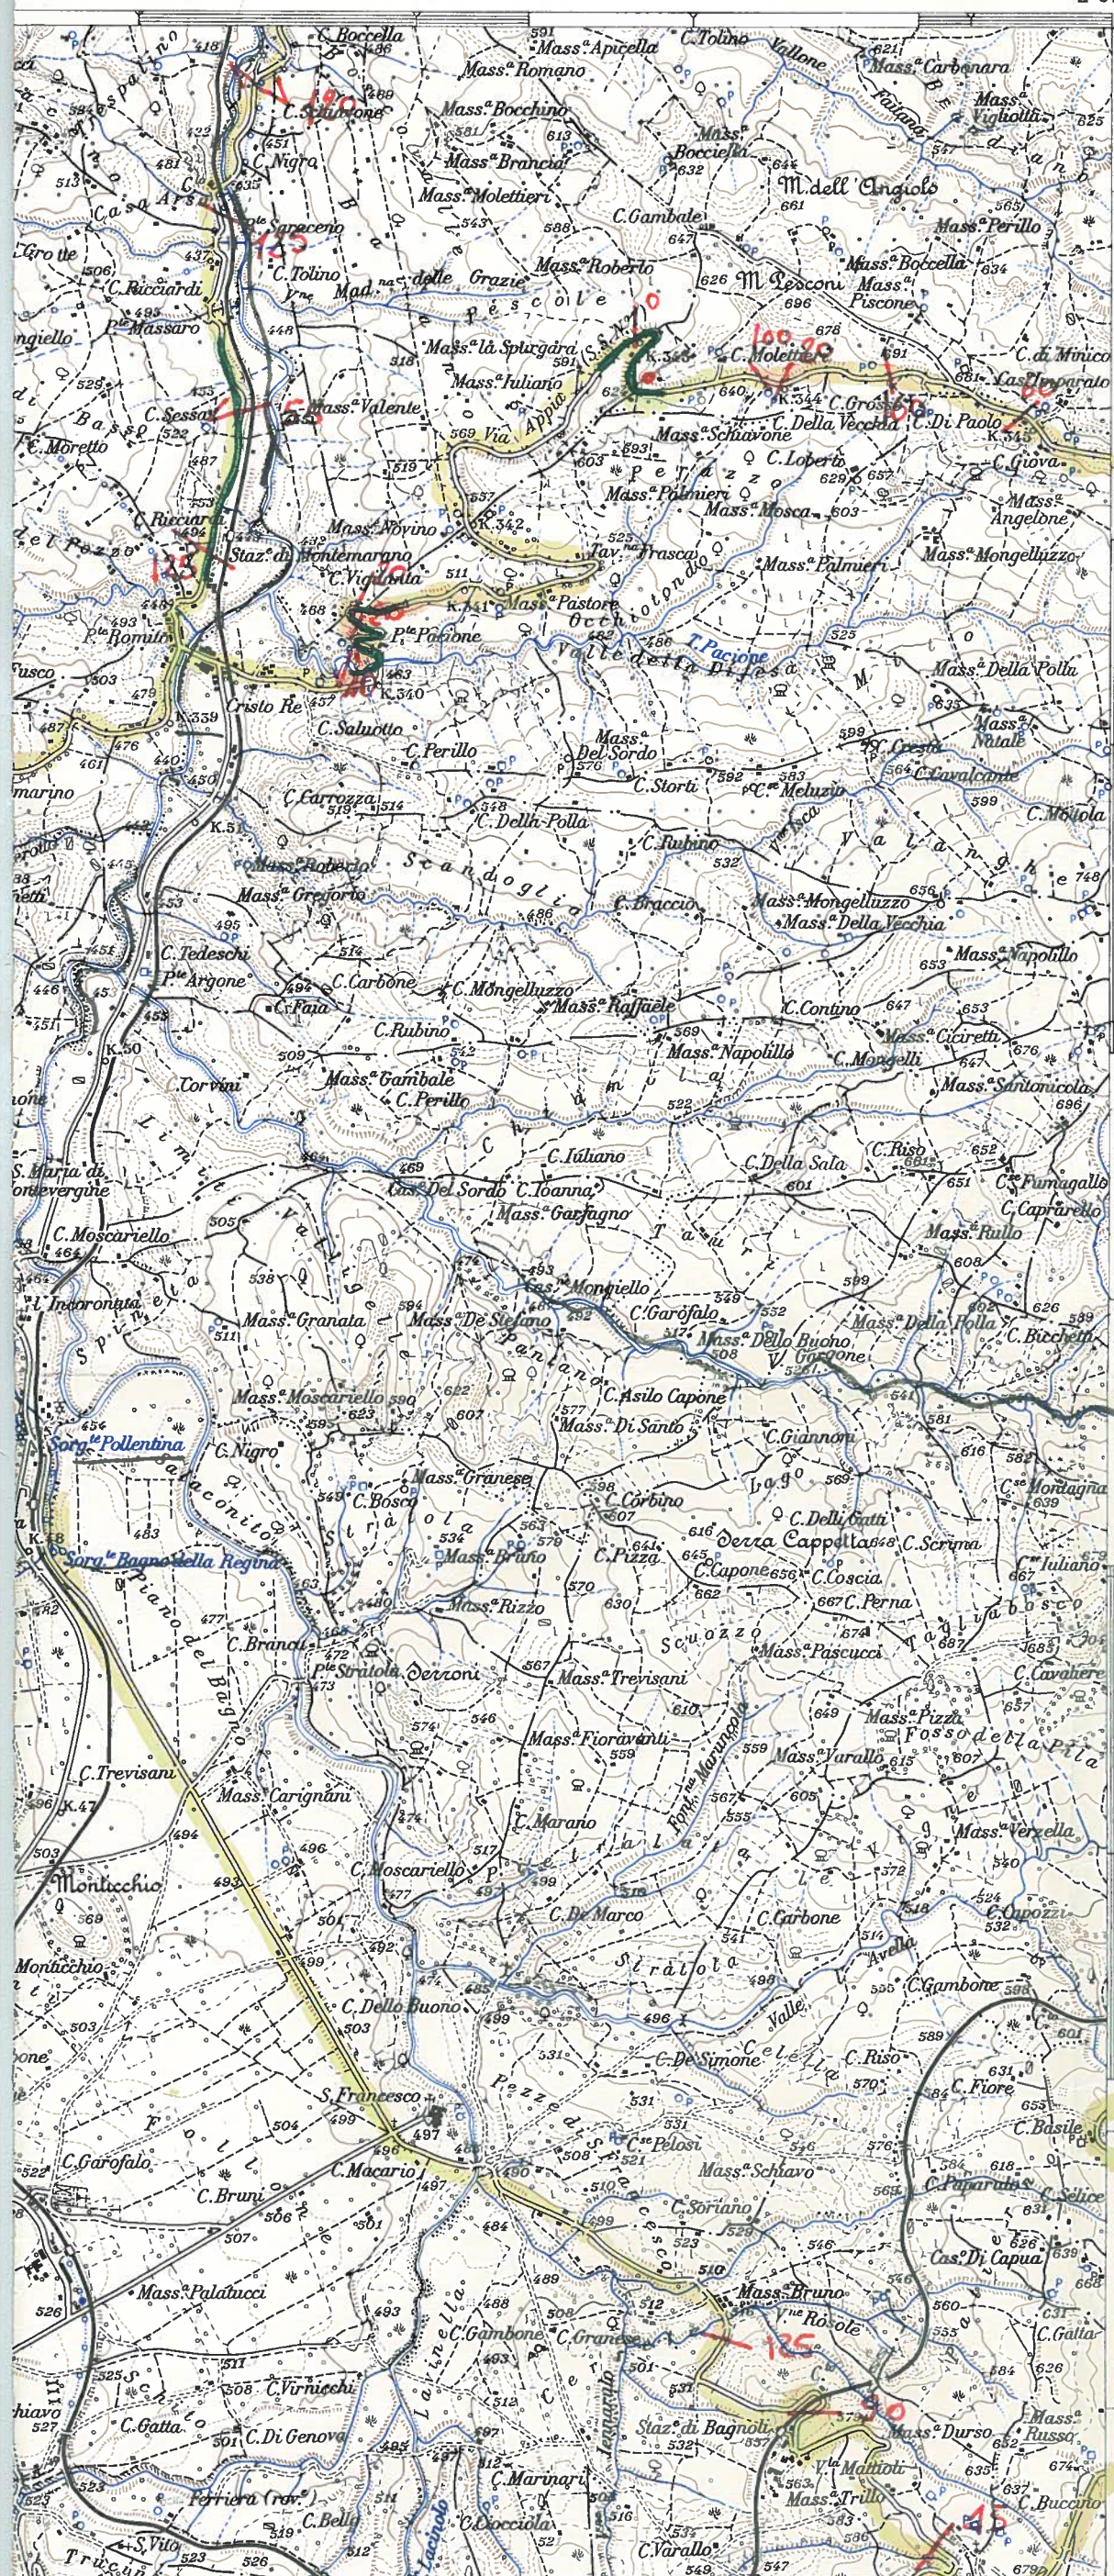

15 → 3.5  
8 → 11

Le coordinate dei vertici di questa carta nel reticolato italiano (proiezione Gauss-Boaga, ellissoide internazionale, orientamento a M. Mario 1940) sono le seguenti:

## FUSO EST

|       |                              |       |                              |
|-------|------------------------------|-------|------------------------------|
| N. O. | { E = 2515986<br>N = 4529586 | N. E. | { E = 2526512<br>N = 4529588 |
| S. O. | { E = 2515981<br>N = 4520335 | S. E. | { E = 2526520<br>N = 4520337 |

Nelle carte sulle quali è stato tracciato il reticolato italiano, questo è indicato nella cornice con i seguenti segni convenzionali: fuso est — fuso ovest —

40°50'00"



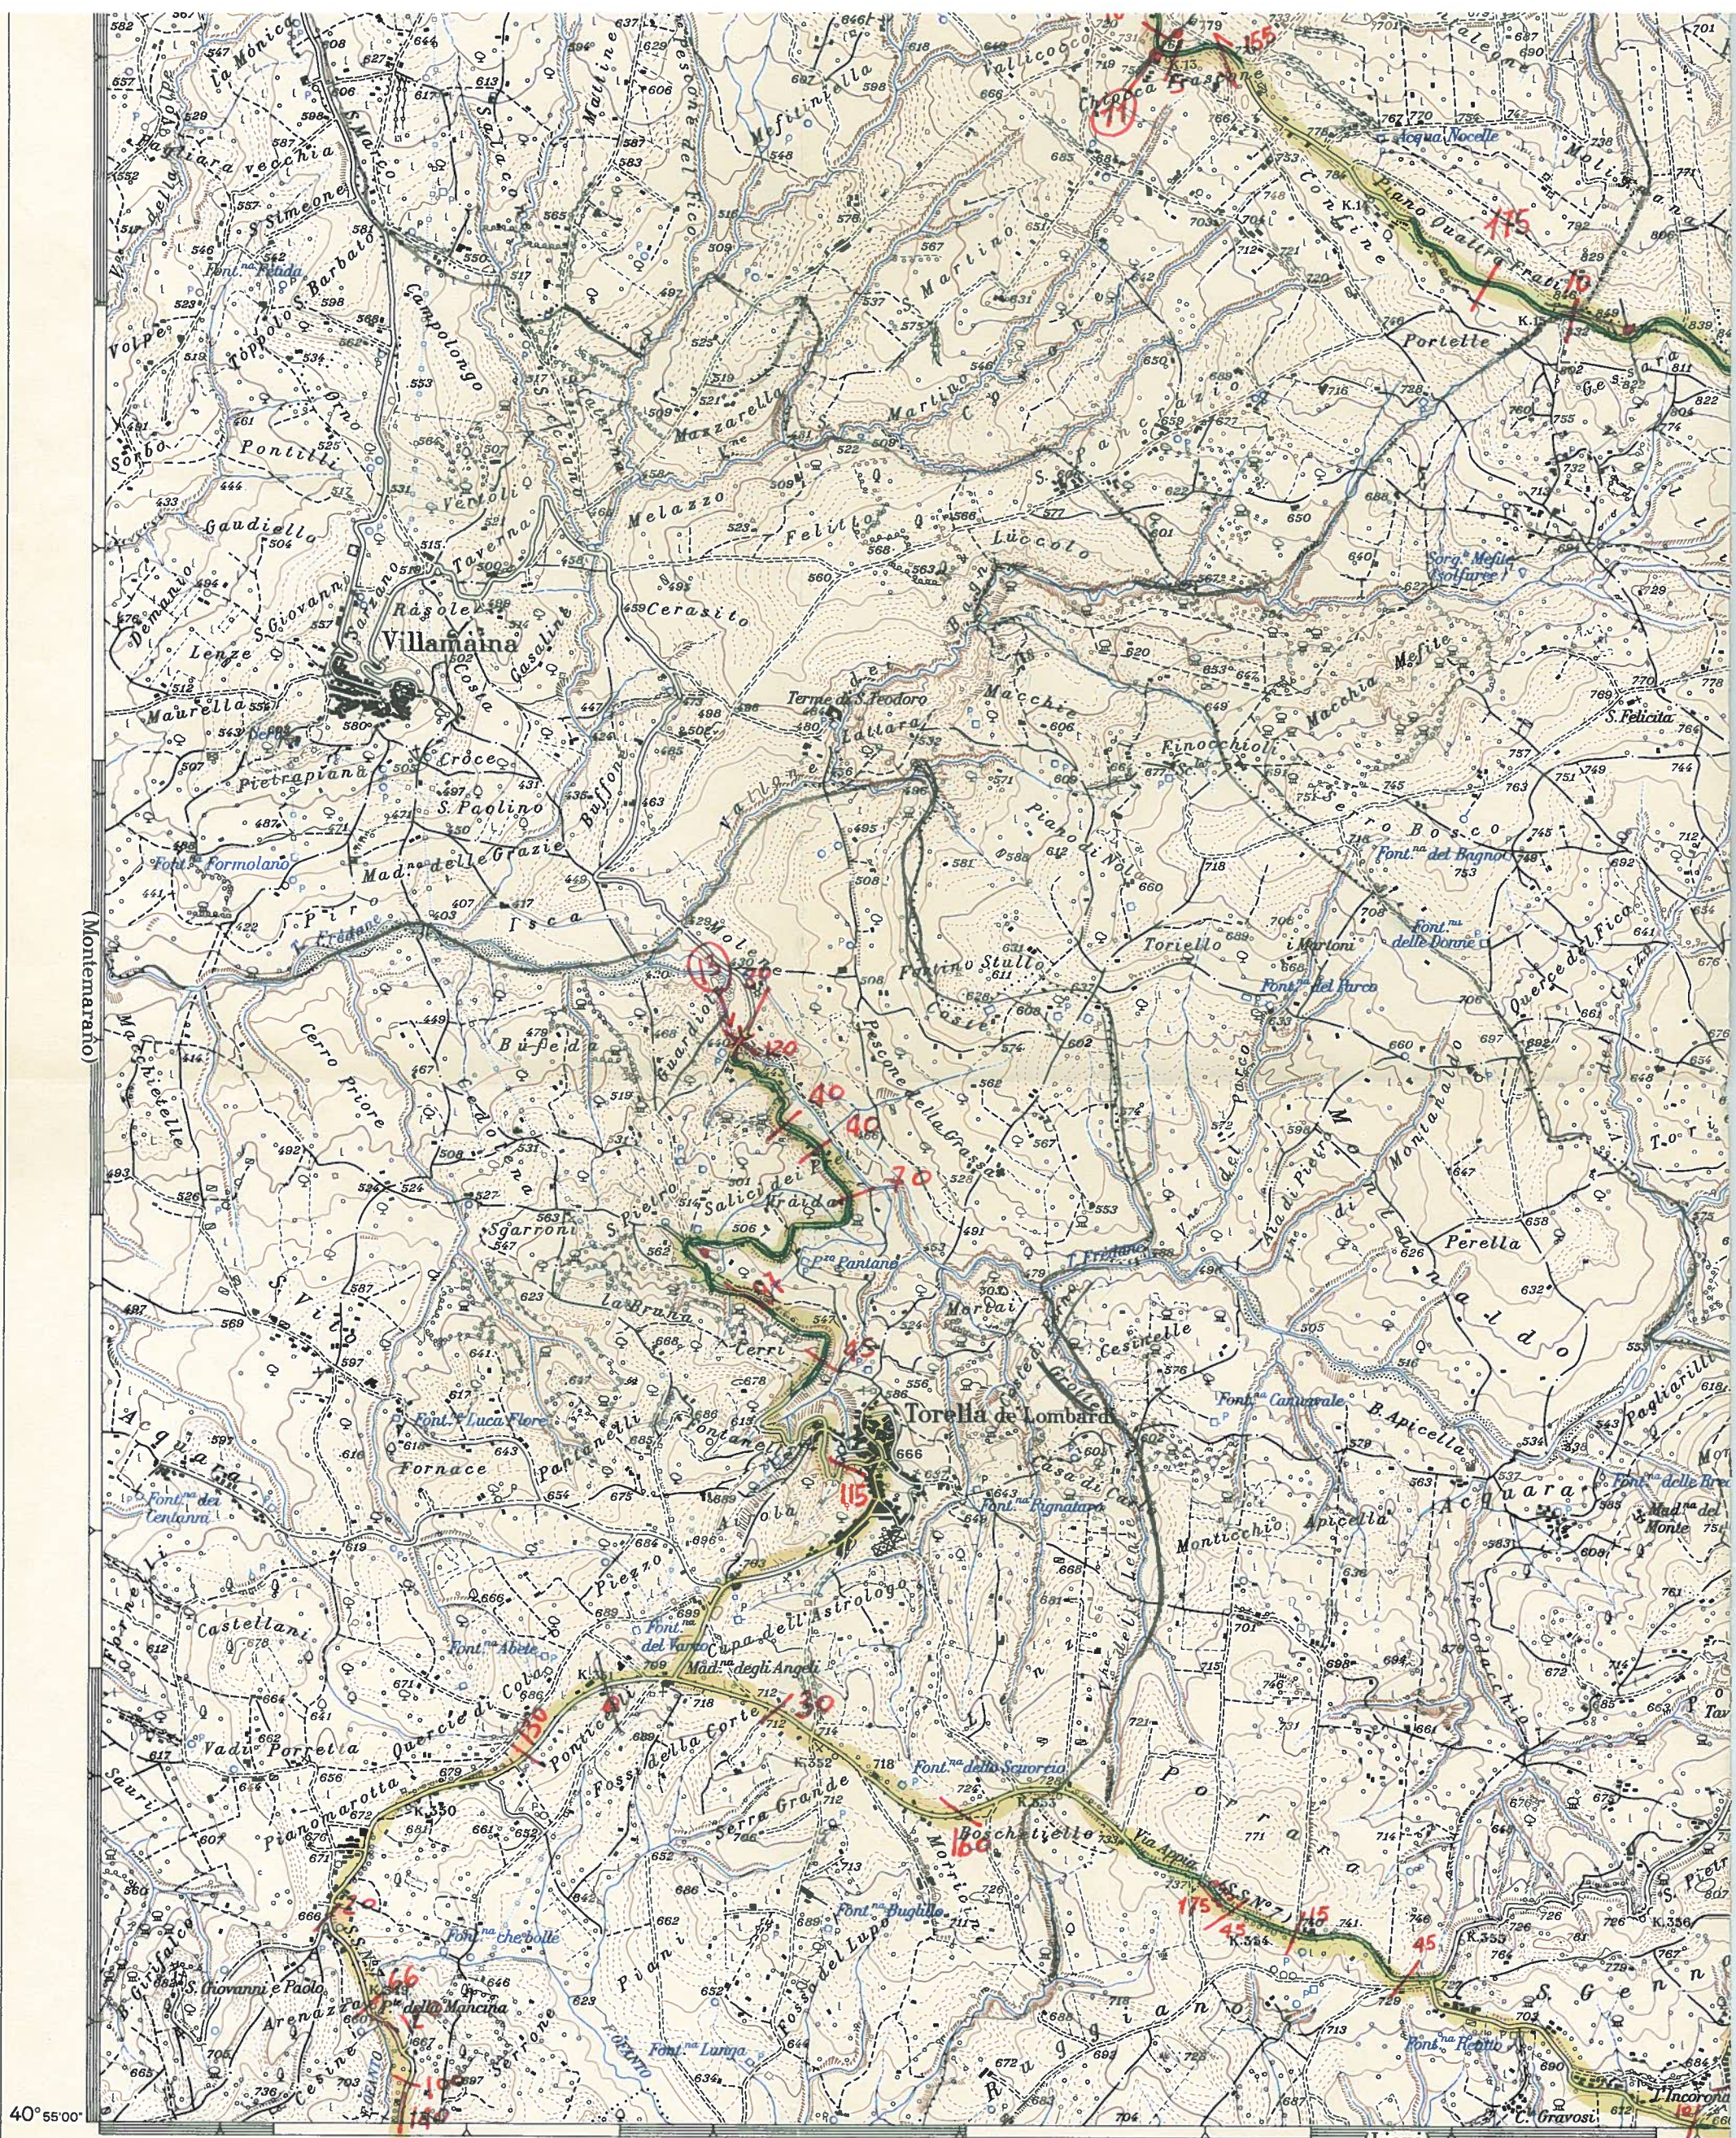

40° 55' 00"  
2° 37' 30"  
L'equidistanza è di metri 25  
(Per le curve a tratti di m 5)

Istituto geografico militare

Aerofotografie del 1954-1955

Rilievo fotogrammetrico del 1955

Segni Convenzionali  
(Norme 1958)

|                     |                      |         |                                                                     |
|---------------------|----------------------|---------|---------------------------------------------------------------------|
| Stazione            | Galleria             | Fermata | Ferrovia ad un binario                                              |
| Cavalpatria         | Sottopassaggio       | K. 101  | Ferrovia a due binari                                               |
| Passaggio a livello | 53' altezza in m     |         | Ferrovia a scartamento ridotto, tranvia in sede propria, funicolare |
| Tramvia su strada   | Filovia              |         | Ferrovia a trazione elettrica e rotabile fiancheggiante             |
|                     |                      |         | Ferrovia in costruzione o in disarmo                                |
|                     |                      |         | Teleferica stabile                                                  |
| Staz.               | Staz.                |         | Funivia                                                             |
|                     |                      |         | Slittovia e rotovia                                                 |
|                     |                      |         | Seggiovie e sciovie                                                 |
| Limiti di:          | Stato                | Regione | Provincia                                                           |
|                     | Terminazione cultura | bosco   |                                                                     |

1000m 500m 0  
Scala di 1:25 000

|                                 |                                       |
|---------------------------------|---------------------------------------|
| con muri                        | Autostrada                            |
| Pendenza K. 2                   | Strada larga 8 m ed oltre (1° cl. se) |
| dal 7 al 12% sup. al 12%        | Strada larga da 6 ad 8 m (2° cl. se)  |
| Galleria                        | Strada larga meno di 6 m (3° cl. se)  |
| Strozzature in m                | Strada in costruzione                 |
| (2) (3) (4) (5)                 | Carreggiabile (4° cl. se)             |
| Allargamenti o strozzature in m | Carraireccia (5° cl. se)              |
| (7) (8) (9) (10)                | Mulattiera                            |
| con muri                        | Sentiero                              |
| id.                             | Tratturo, pista o traccia             |
| Mulattiera                      |                                       |
| Rasso, Colle, Valico            |                                       |
| facile                          |                                       |
| difficile                       |                                       |
| Ponti                           | per ferrovie                          |
|                                 | per strade ord.                       |
|                                 | per autostrade                        |



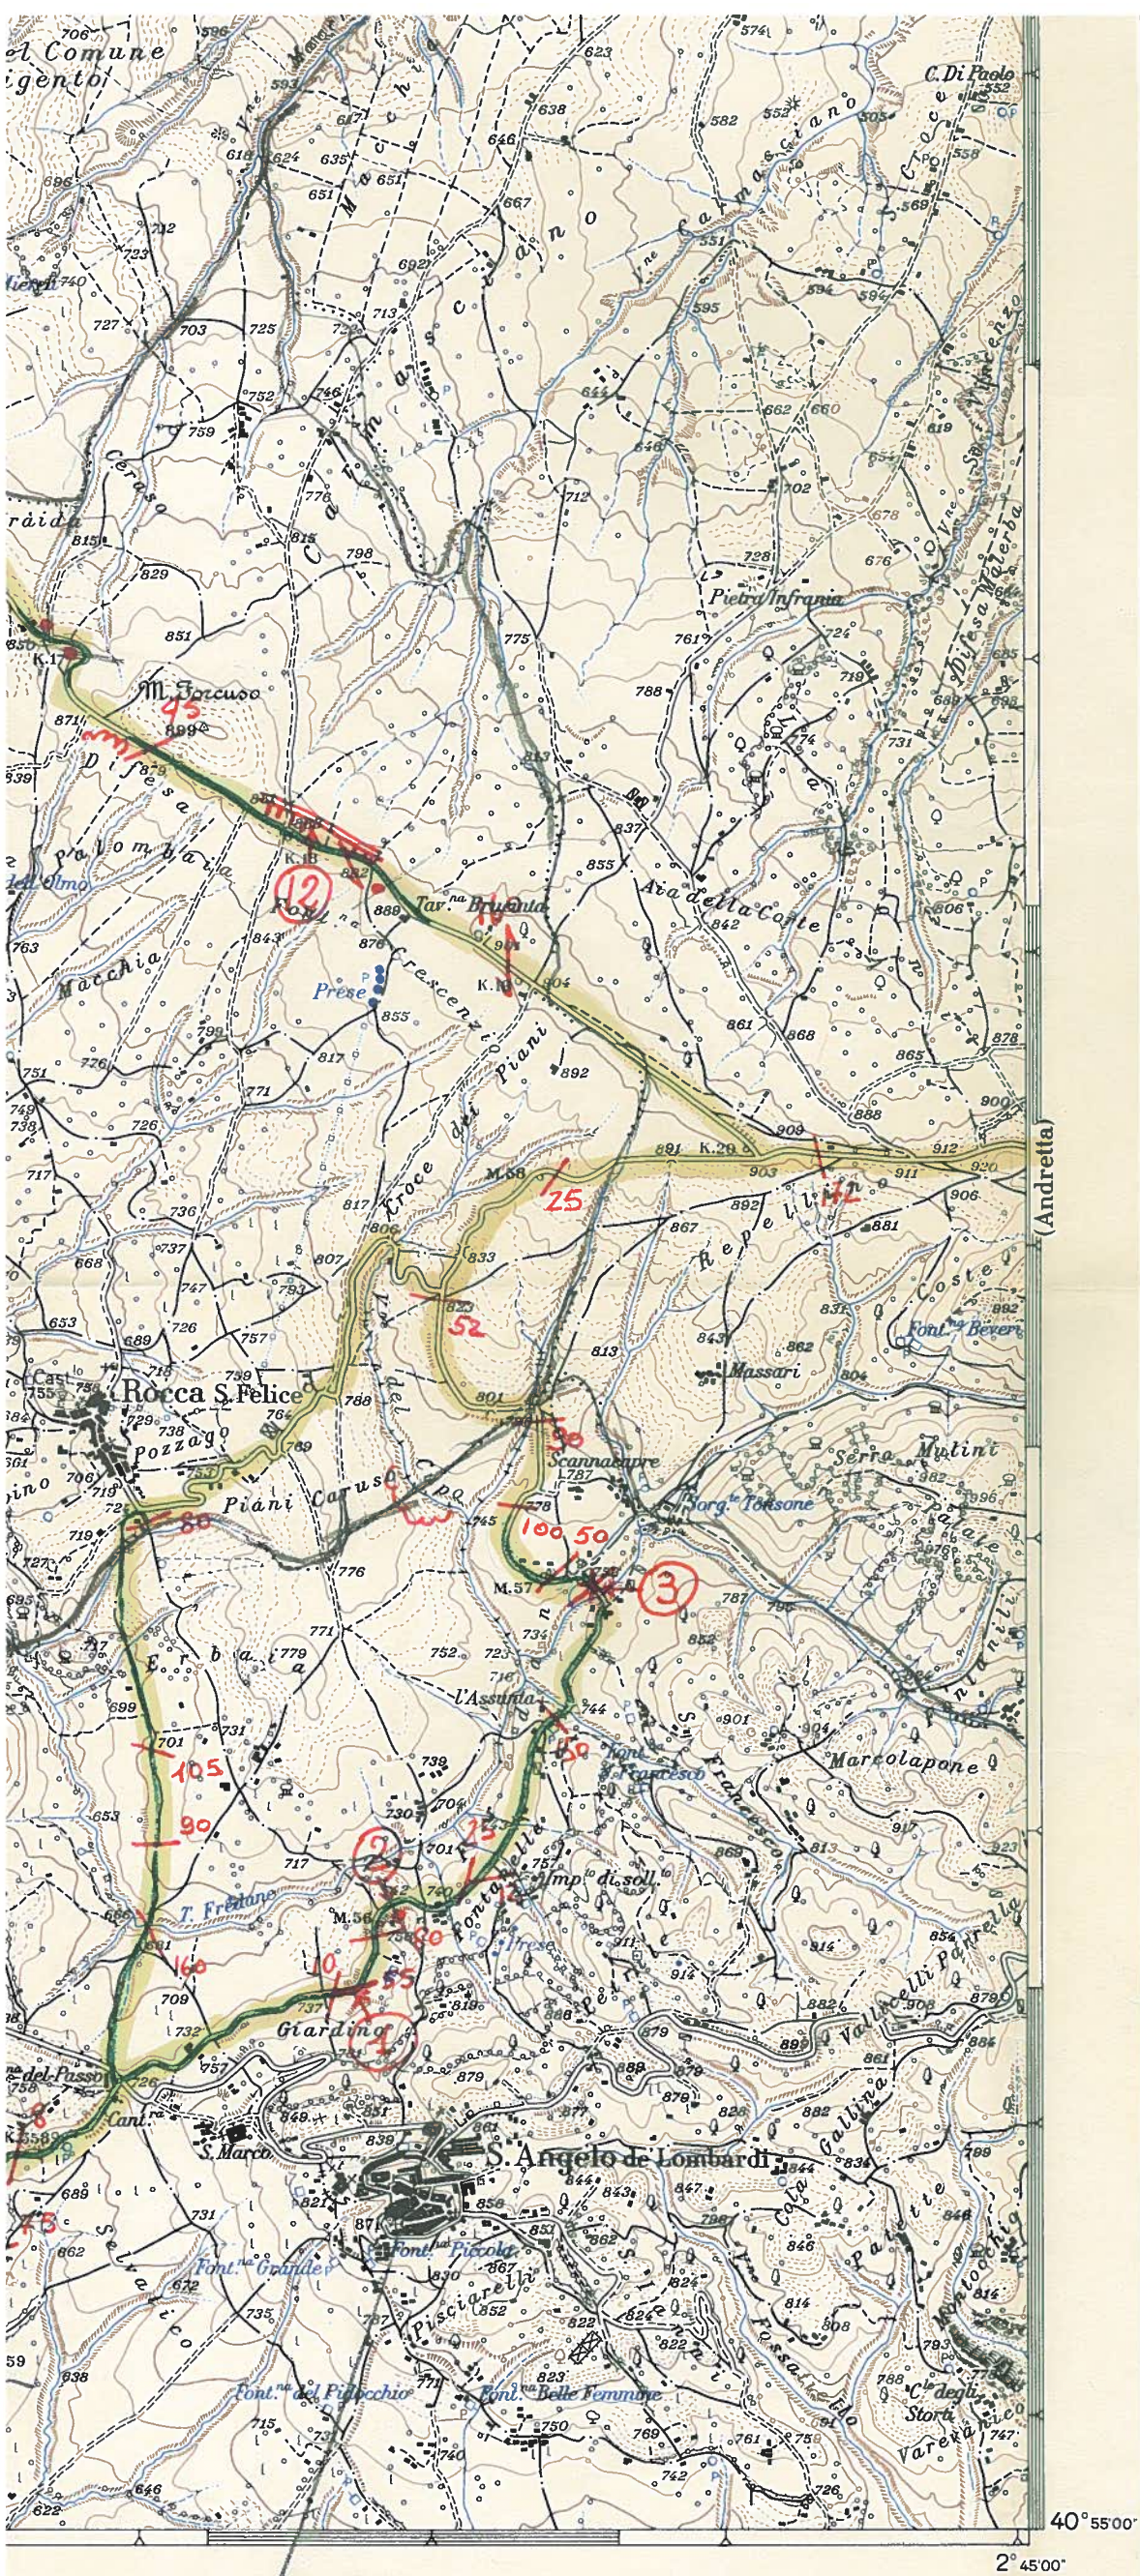

24

Le coordinate dei vertici di questa carta nel reticolato italiano (proiezione Gauss-Boaga, ellissoide internazionale, orientamento a M. Mario 1940) sono le seguenti:

FUSO EST

|       |             |       |             |
|-------|-------------|-------|-------------|
| N. O. | E = 2526504 | N. E. | E = 2537017 |
|       | N = 4538839 |       | N = 4538856 |
| S. O. | E = 2526512 | S. E. | E = 2537039 |
|       | N = 4529588 |       | N = 4529605 |

Nelle carte sulle quali è stato tracciato il reticolato italiano, questo è indicato nella cornice con i seguenti segni convenzionali: fuso est ← , fuso ovest →

Km 359 - Km 358  
2

- Casa in muratura, baracca, capanna, ruderi  
⚡ Opifici: a forza idraulica, a vapore, elettrici  
⚡ Centrali: idroelettrica, termoelettrica  
✙ Chiese, cappella od oratori  
✙ Tabernacolo o pilone, croce isolata, cimitero  
☼ Fumaiolo, torre, guglia, campanile  
⚡ Pietra o colonna indicatrice, monumento notevole  
✙ Staz. e antenna radio, faro, fanale  
✙ Miniera, aeromotore, pozzo di petrolio o di metano
- Acquedotti:
- Canali:
- Aeroporti:
- Idroscali:
- Pozzo e sorgente perenne  
Pozzo e sorgente non perenne  
Pozzo con aeromotore, noria od altro mezzo di estrazione  
Pozzo artesiano, fontana, cisterna  
Abbeveratoio, cascata  
Muri a calce a secco e maceria di sostegno  
Pulizzata o staccionata siepe  
filo spinato

Vegetazione:

- Q Quercie, olmi  
Q Castagni  
F Faggi  
P Pioppi  
A Abeti  
L Larici  
P Pini  
C Cipressi  
C Cedui  
A Alberi da frutto  
C Carrubi  
M Mandorli  
O Olivi  
A Agrumi  
V Viti

Tutti i diritti di riproduzione riservati



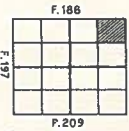

Buccino

F° 198 della Carta d'Italia

# BUCCINO

Longitudine Est dal meridiano di Roma (Monte Mar

(Monte Paratiello)

2°52'30"

40°40'00"

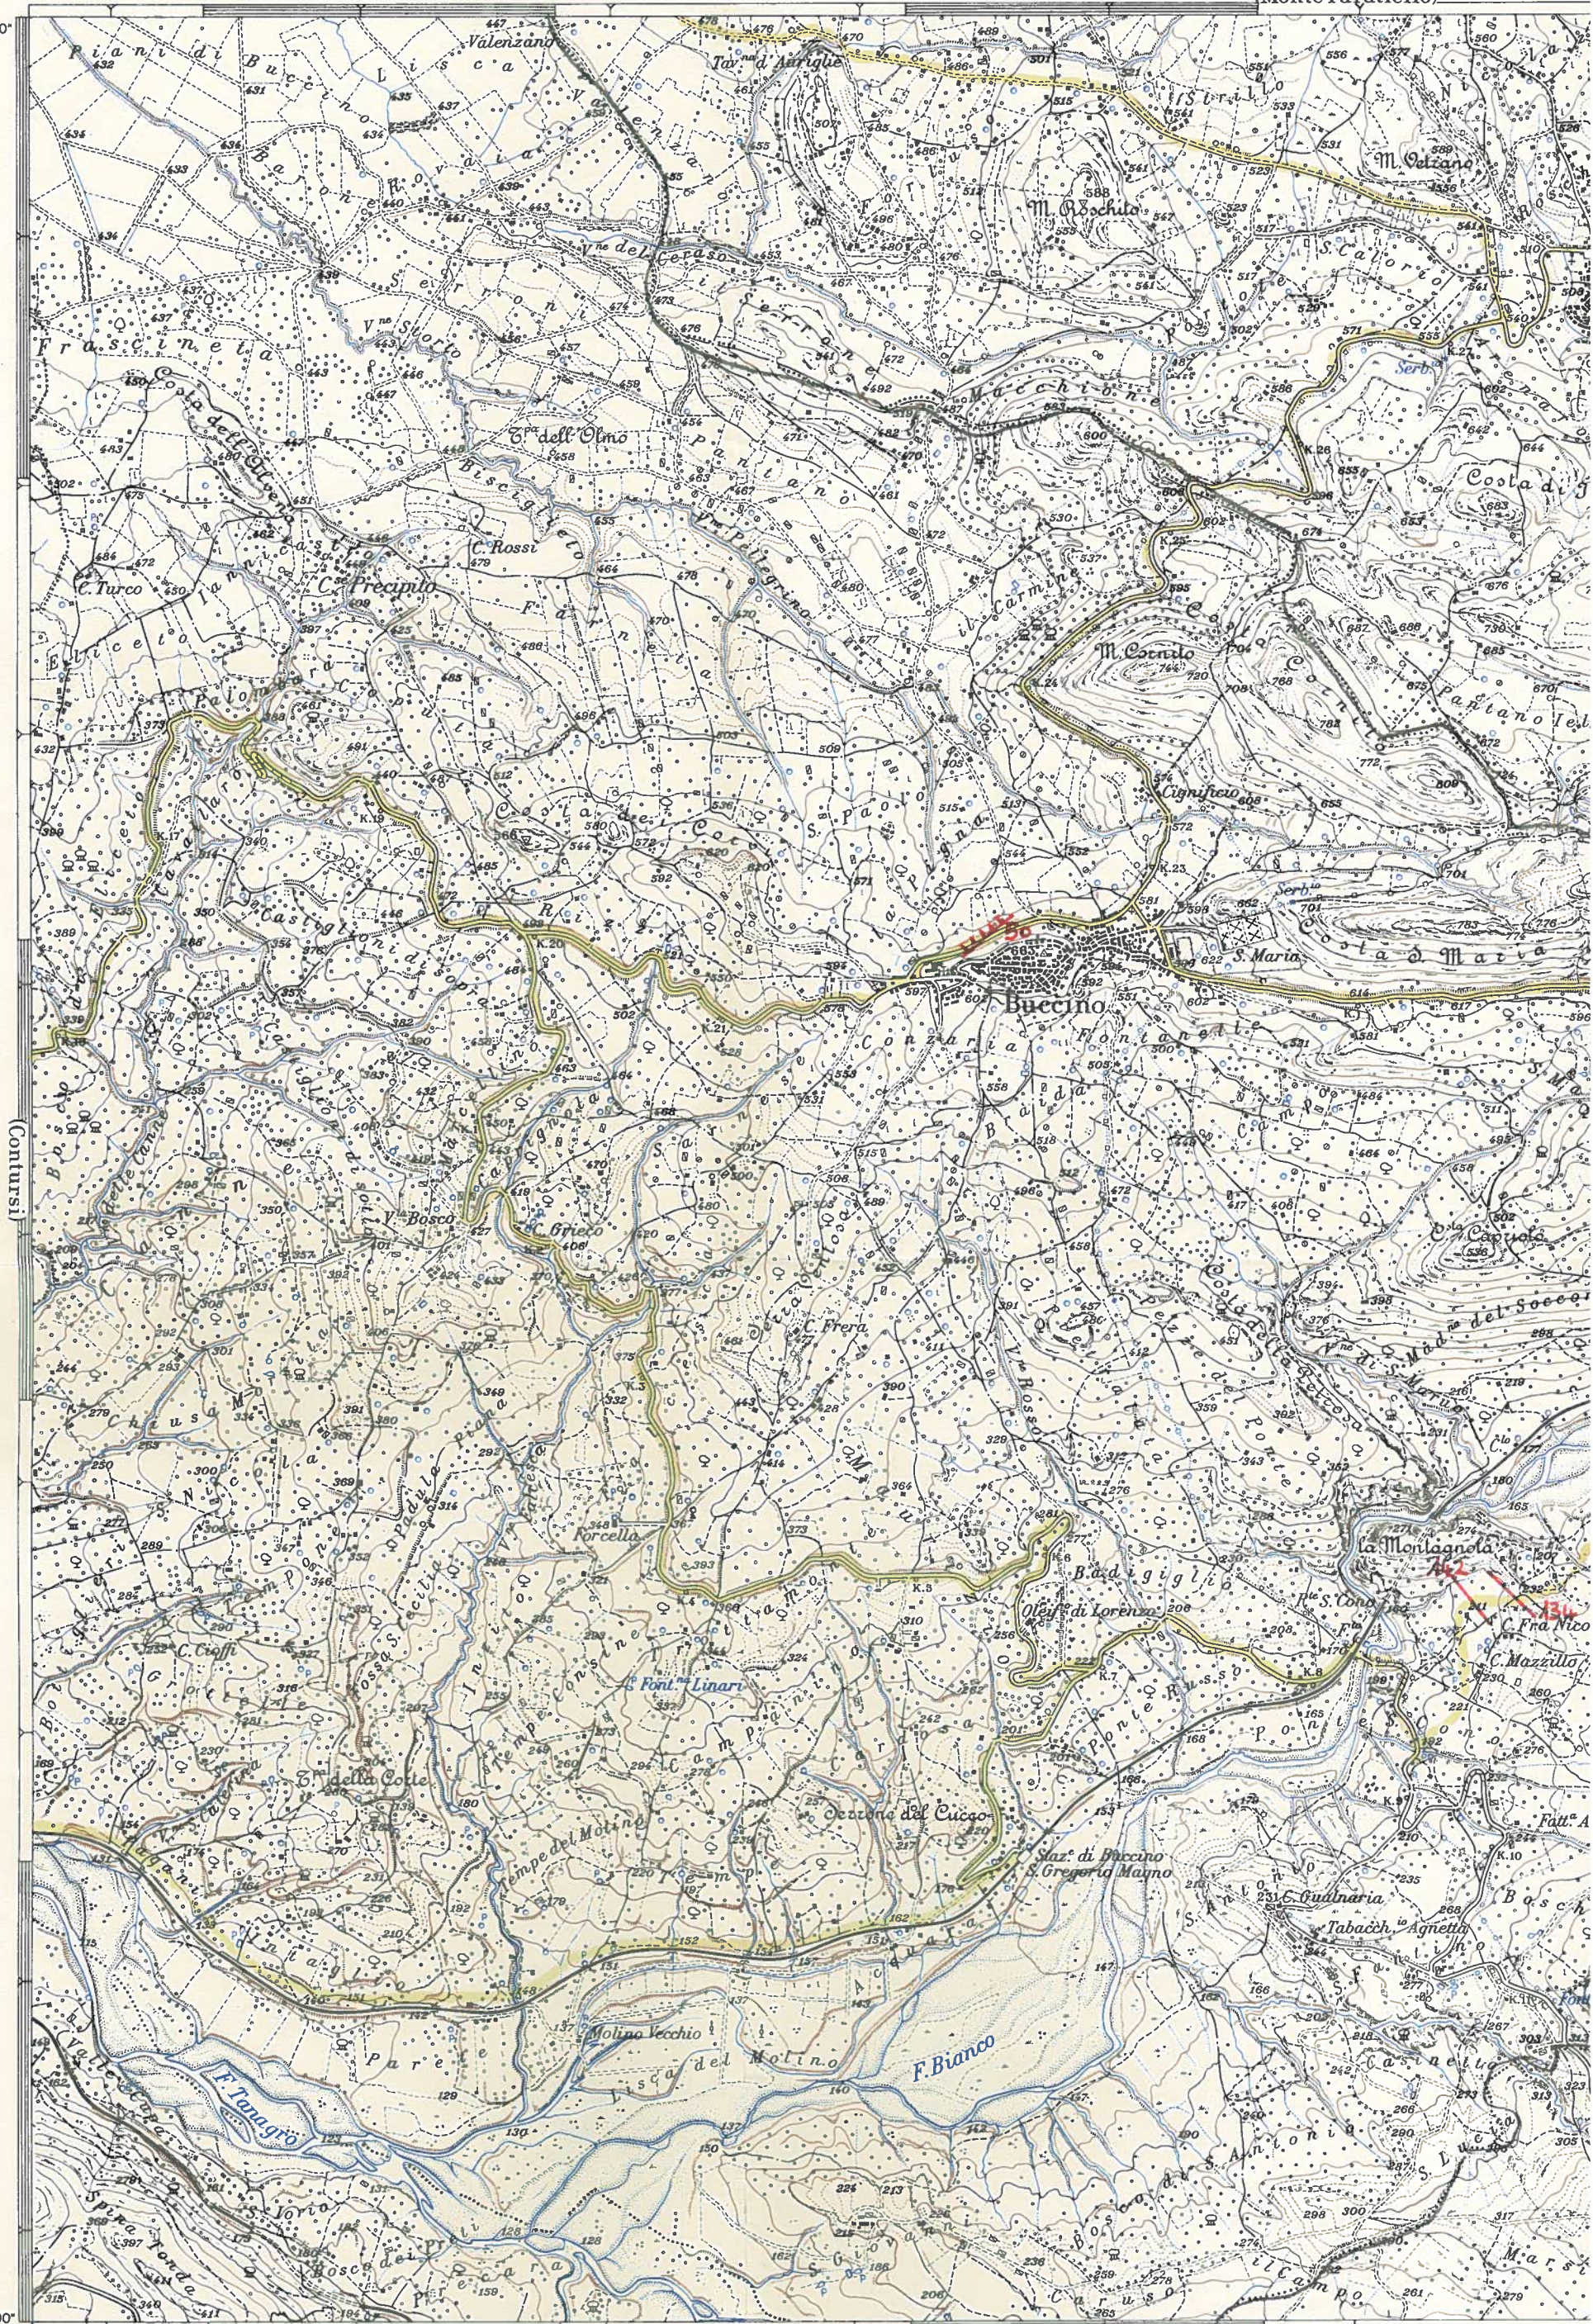

Contursi

40°35'00"

(Auletta)



I N. E.

K. I.

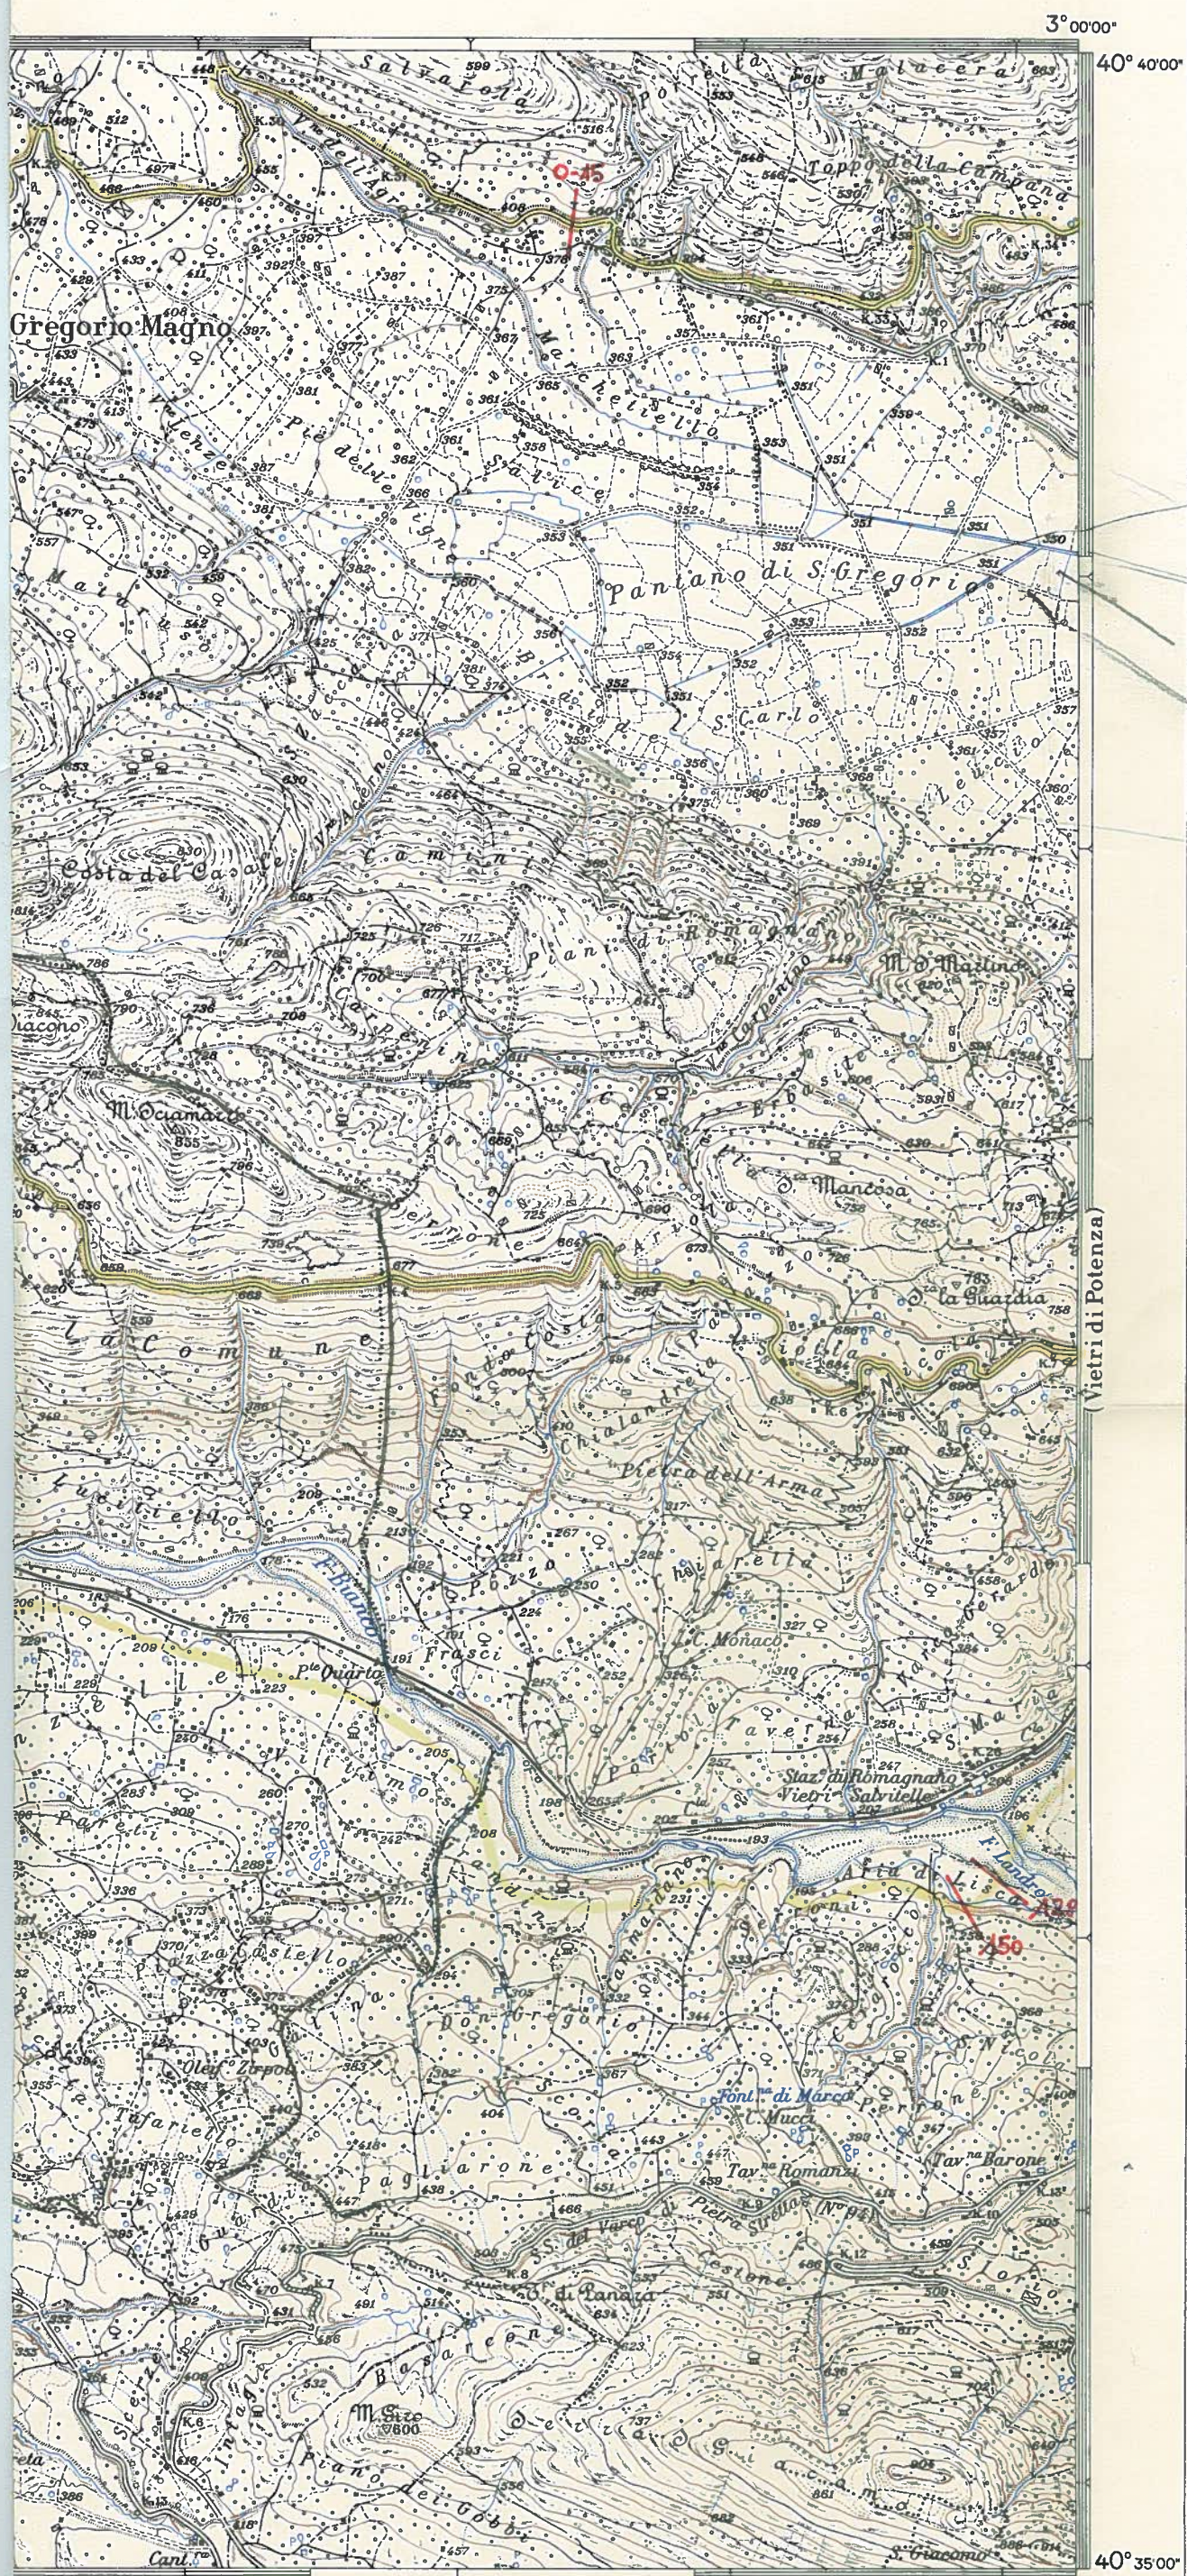

9/2 Sgroso  
Arda.

origine

FUSO EST

$$\begin{array}{ll} \text{N. O.} \left\{ \begin{array}{l} E = 2547669 \\ N = 4501884 \end{array} \right. & \text{N. E.} \left\{ \begin{array}{l} E = 2558235 \\ N = 4501931 \end{array} \right. \\ \text{S. O.} \left\{ \begin{array}{l} E = 2547703 \\ N = 4492634 \end{array} \right. & \text{S. E.} \left\{ \begin{array}{l} E = 2558282 \\ N = 4492681 \end{array} \right. \end{array}$$

Nelle carte sulle quali è stato tracciato il reticolato italiano, questo è indicato nella cornice con i seguenti segni convenzionali: fuso est , fuso ovest .



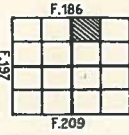

Contursi

F° 198 della Carta d'Italia

# CONTURSI

Longitudine Est dal meridiano di Roma (Monte Mario)

(Colliano)

2° 45' 00"

40° 40' 00"

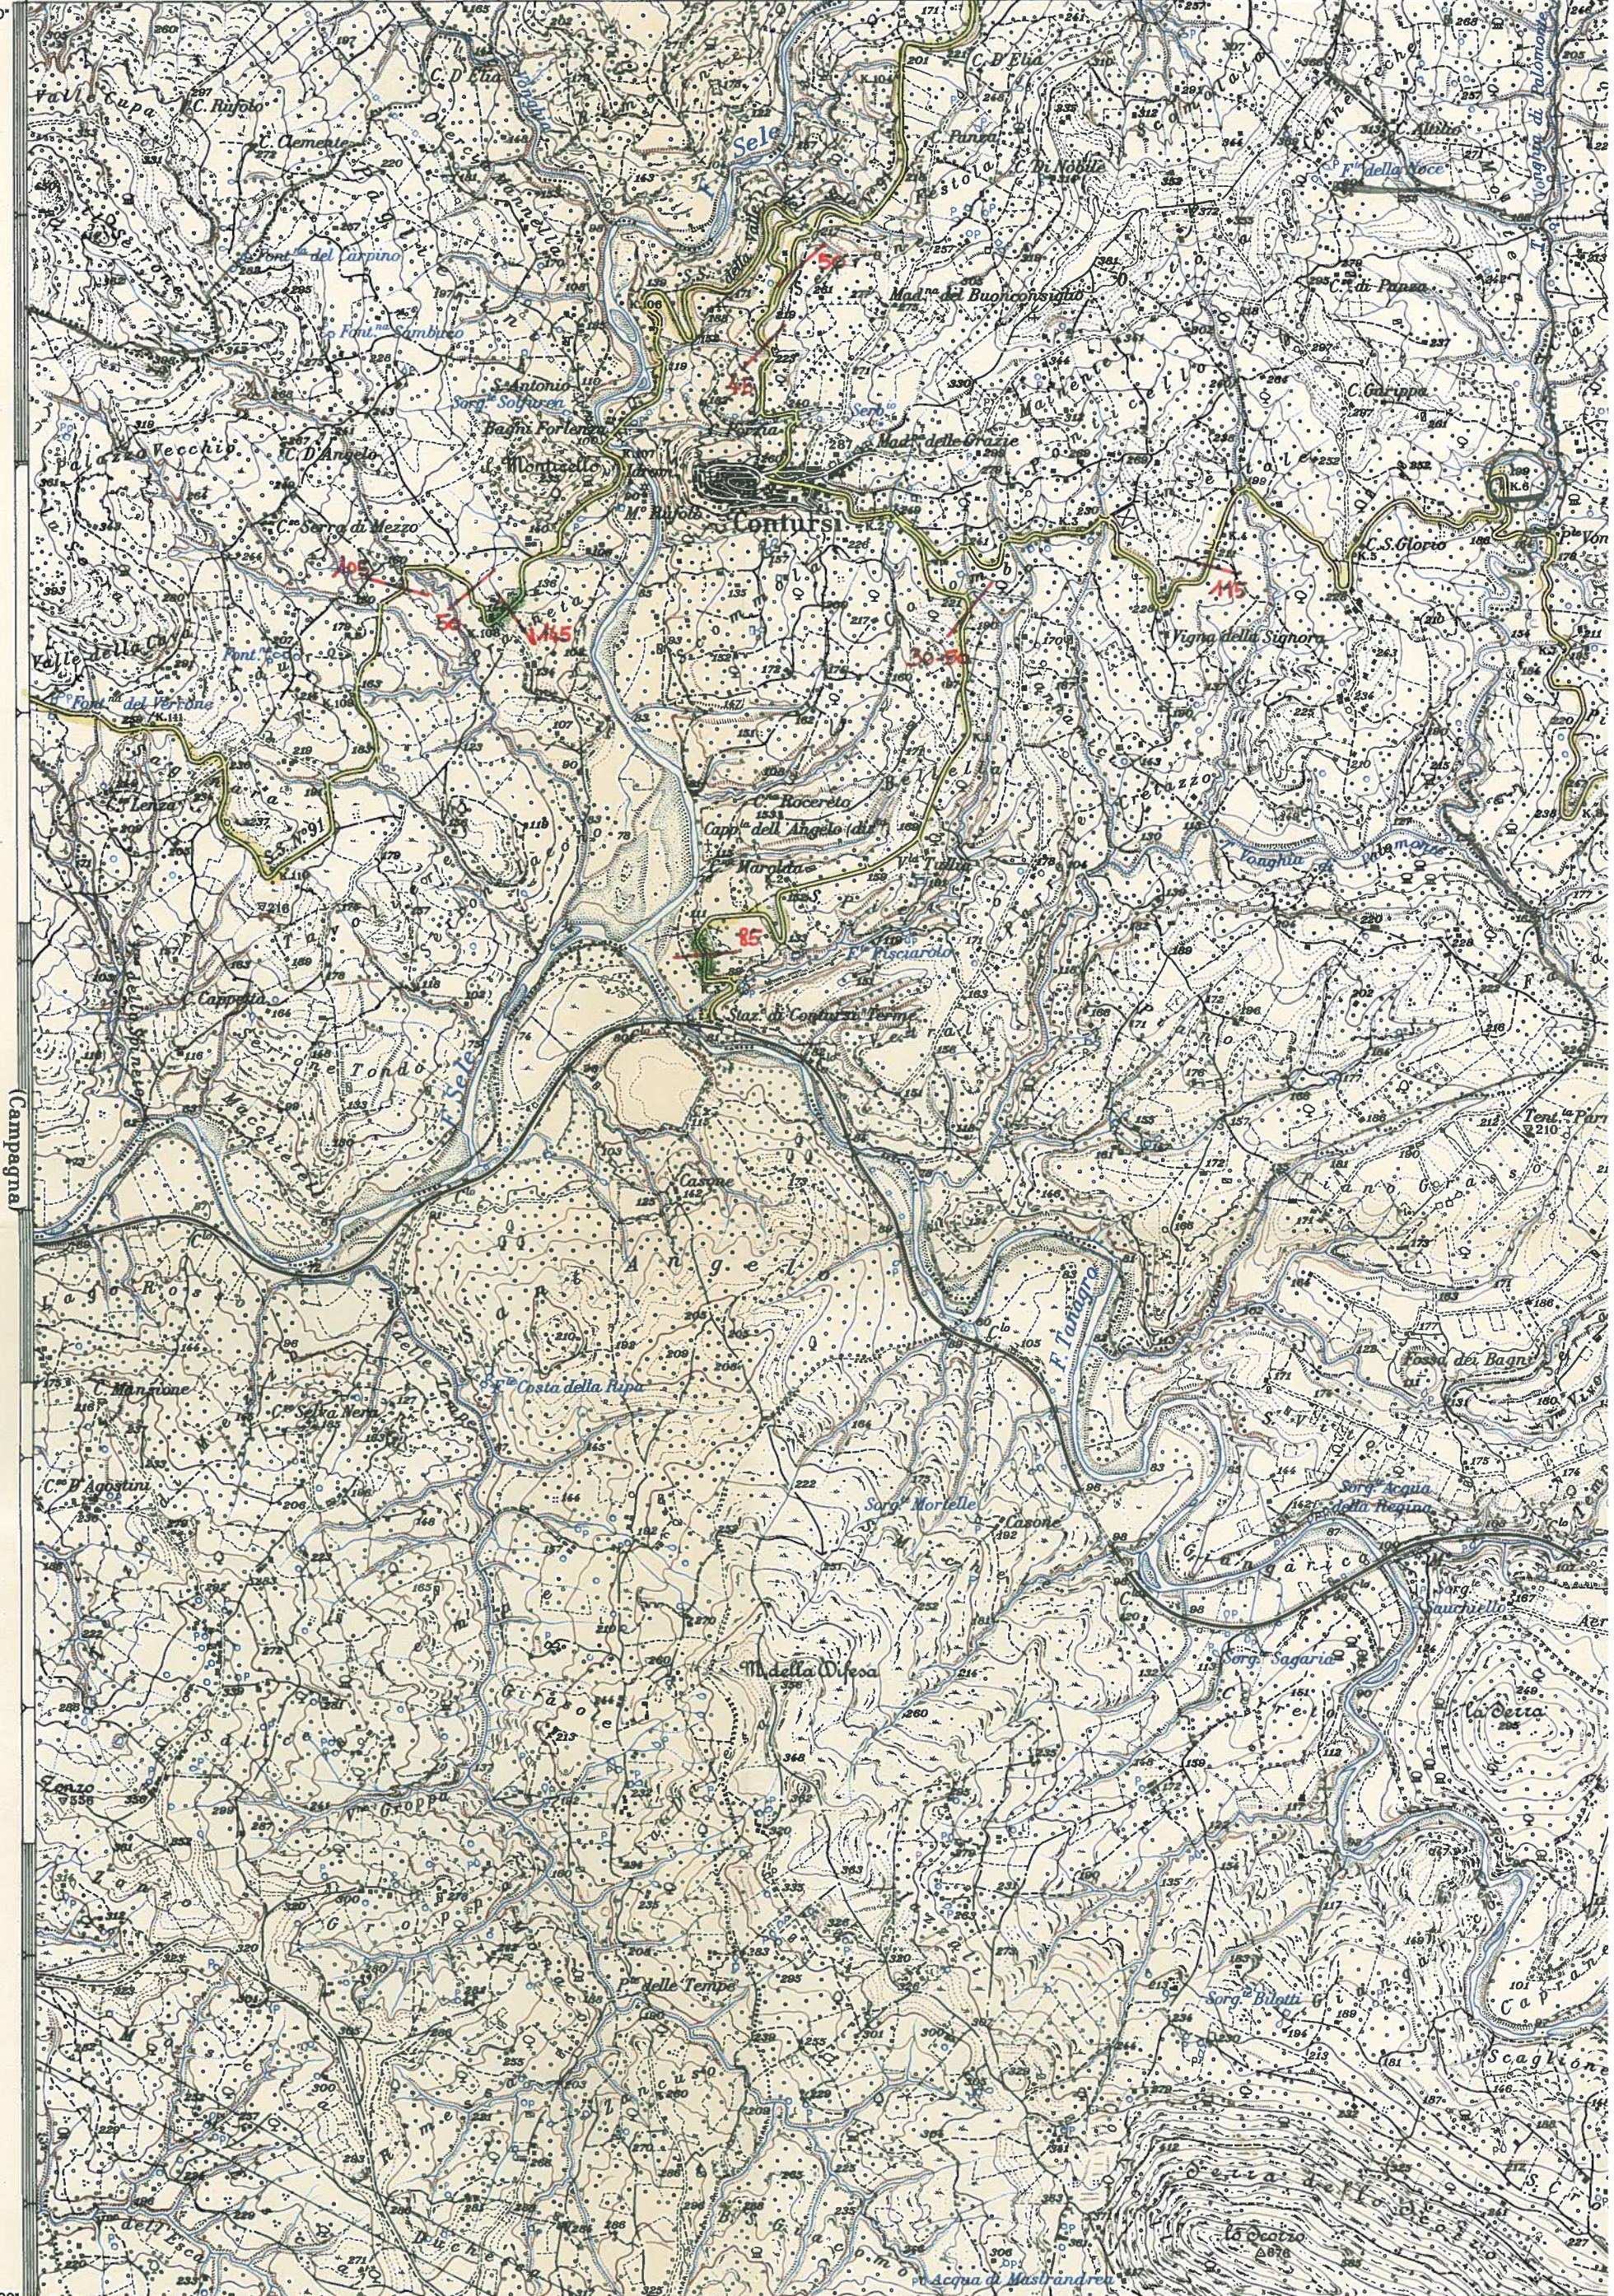

Campania

40° 35' 00"



Le coordinate geografiche sono riferite all'Ellissoide  
Internazionale orientato a Roma (M. Mario)

I N.O.

K

0,5 : 3 = 17

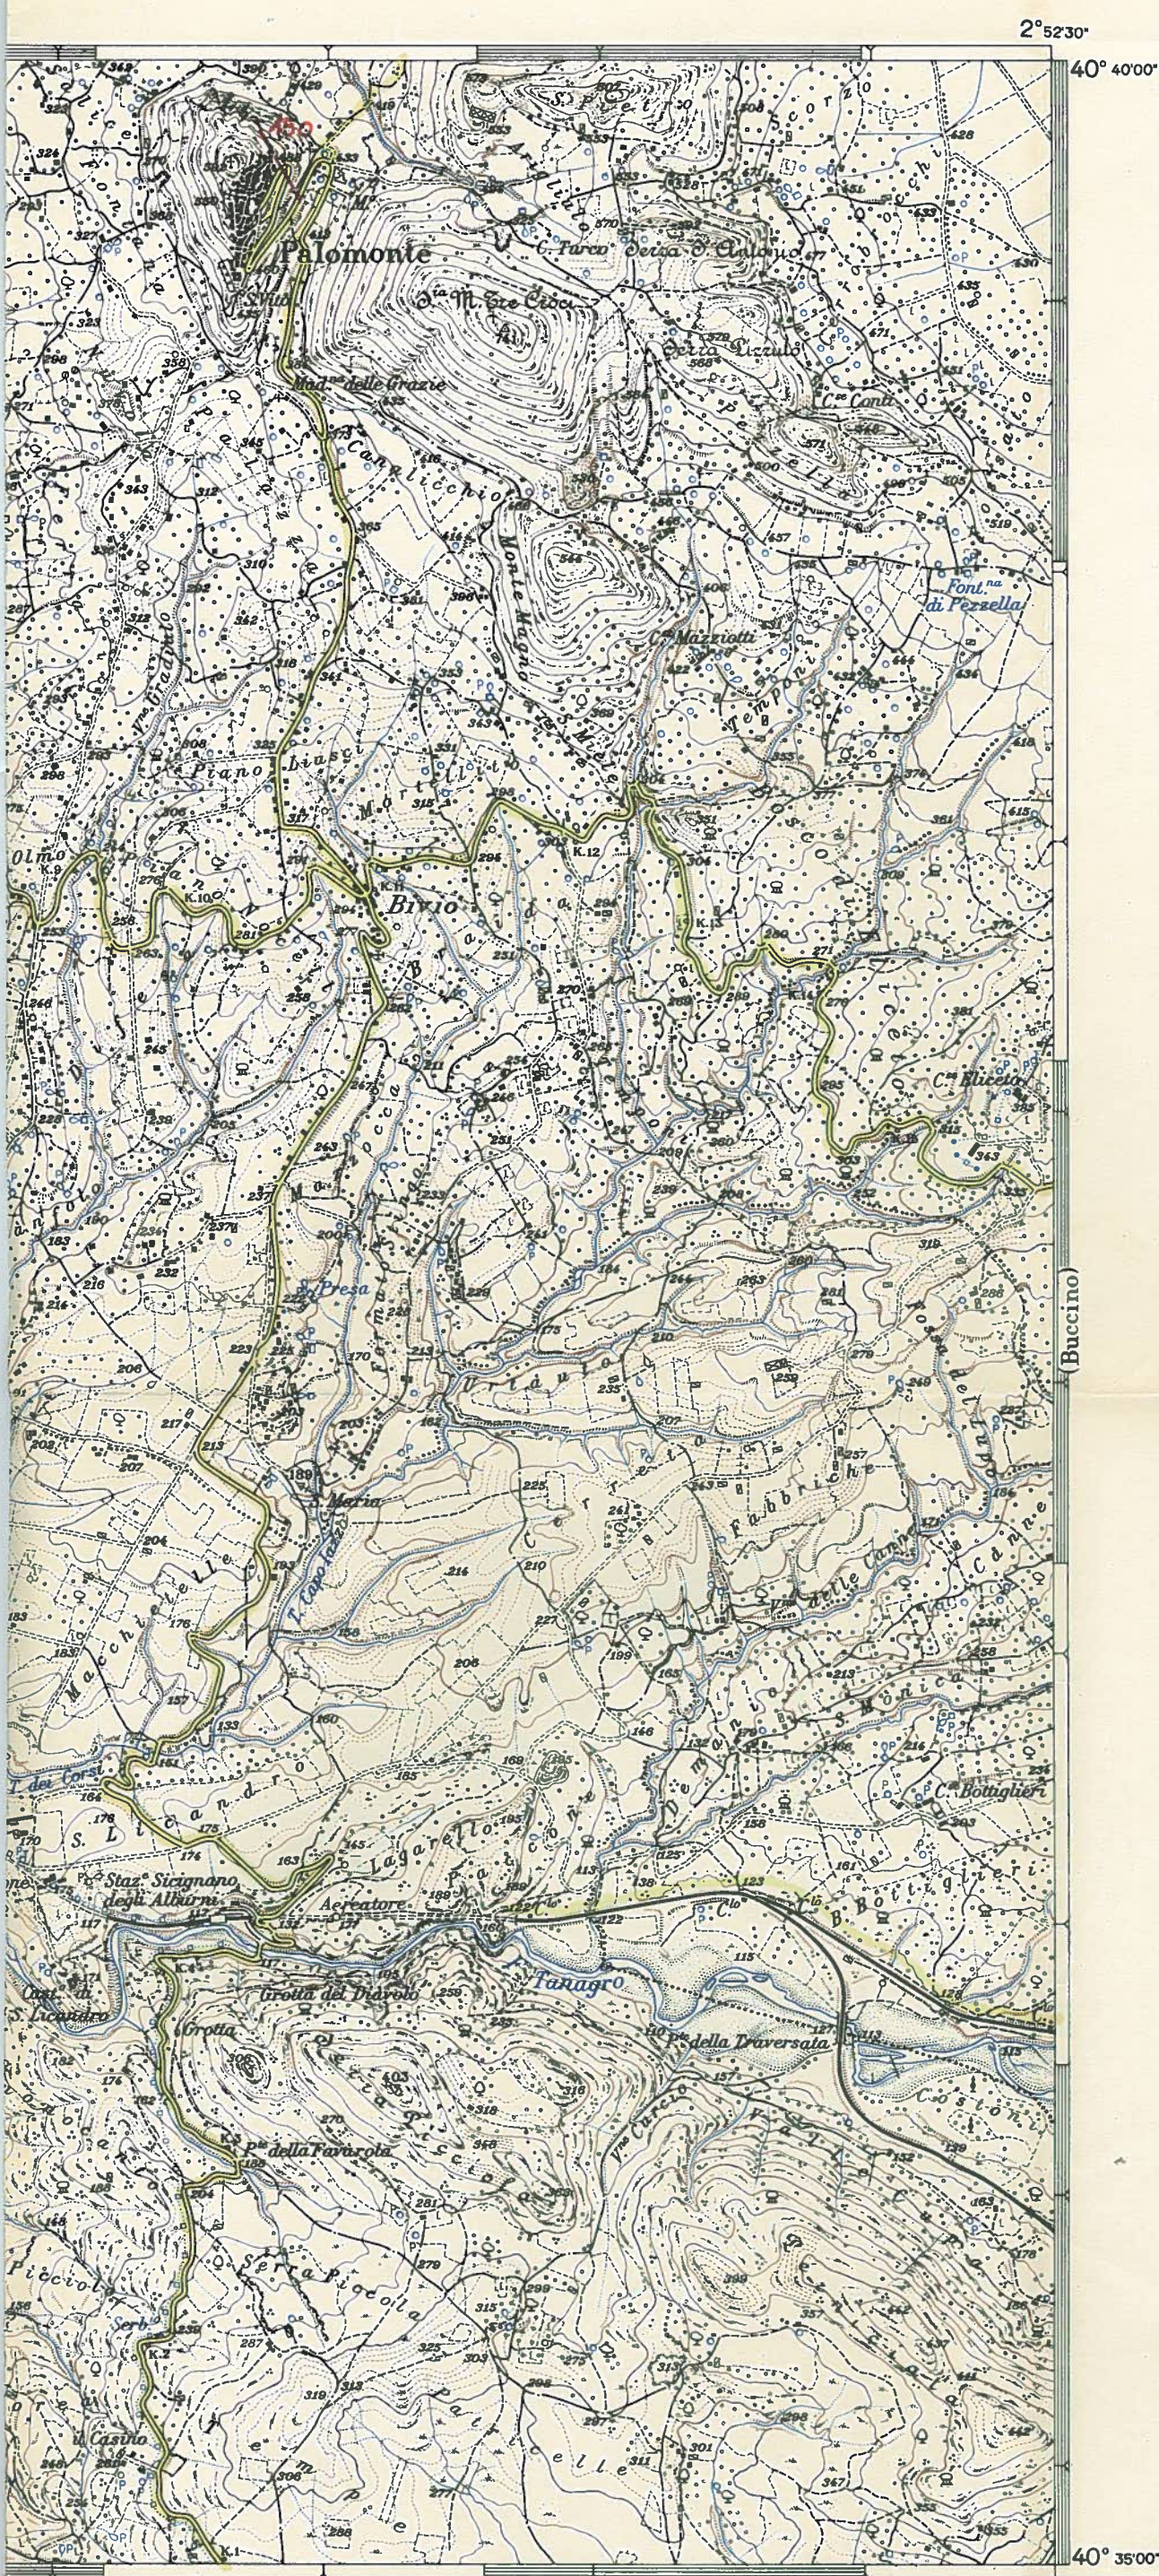

50  
70  
35  
-----  
155 : 4 = 40 km  
  
24 : 40 = 0,6

Le coordinate dei vertici di questa carta nel reticolato italiano (proiezione Gauss-Boaga, ellissoide internazionale, orientamento a M. Mario 1940) sono le seguenti:

FUSO EST

|       |             |       |             |
|-------|-------------|-------|-------------|
| N. O. | E = 2537103 | N. E. | E = 2547669 |
|       | N = 4501853 |       | N = 4501884 |
| S. O. | E = 2537124 | S. E. | E = 2547703 |
|       | N = 4492603 |       | N = 4492634 |

Nelle carte sulle quali è stato tracciato il reticolato italiano, questo è indicato nella cornice con i seguenti segni convenzionali: fuso est — , fuso ovest —



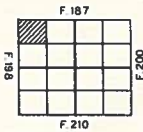

Vietri di Potenza

F°199 della Carta d'Italia

VIETRI DI POT

Longitudine Est dal meridiano di Roma (Monte I

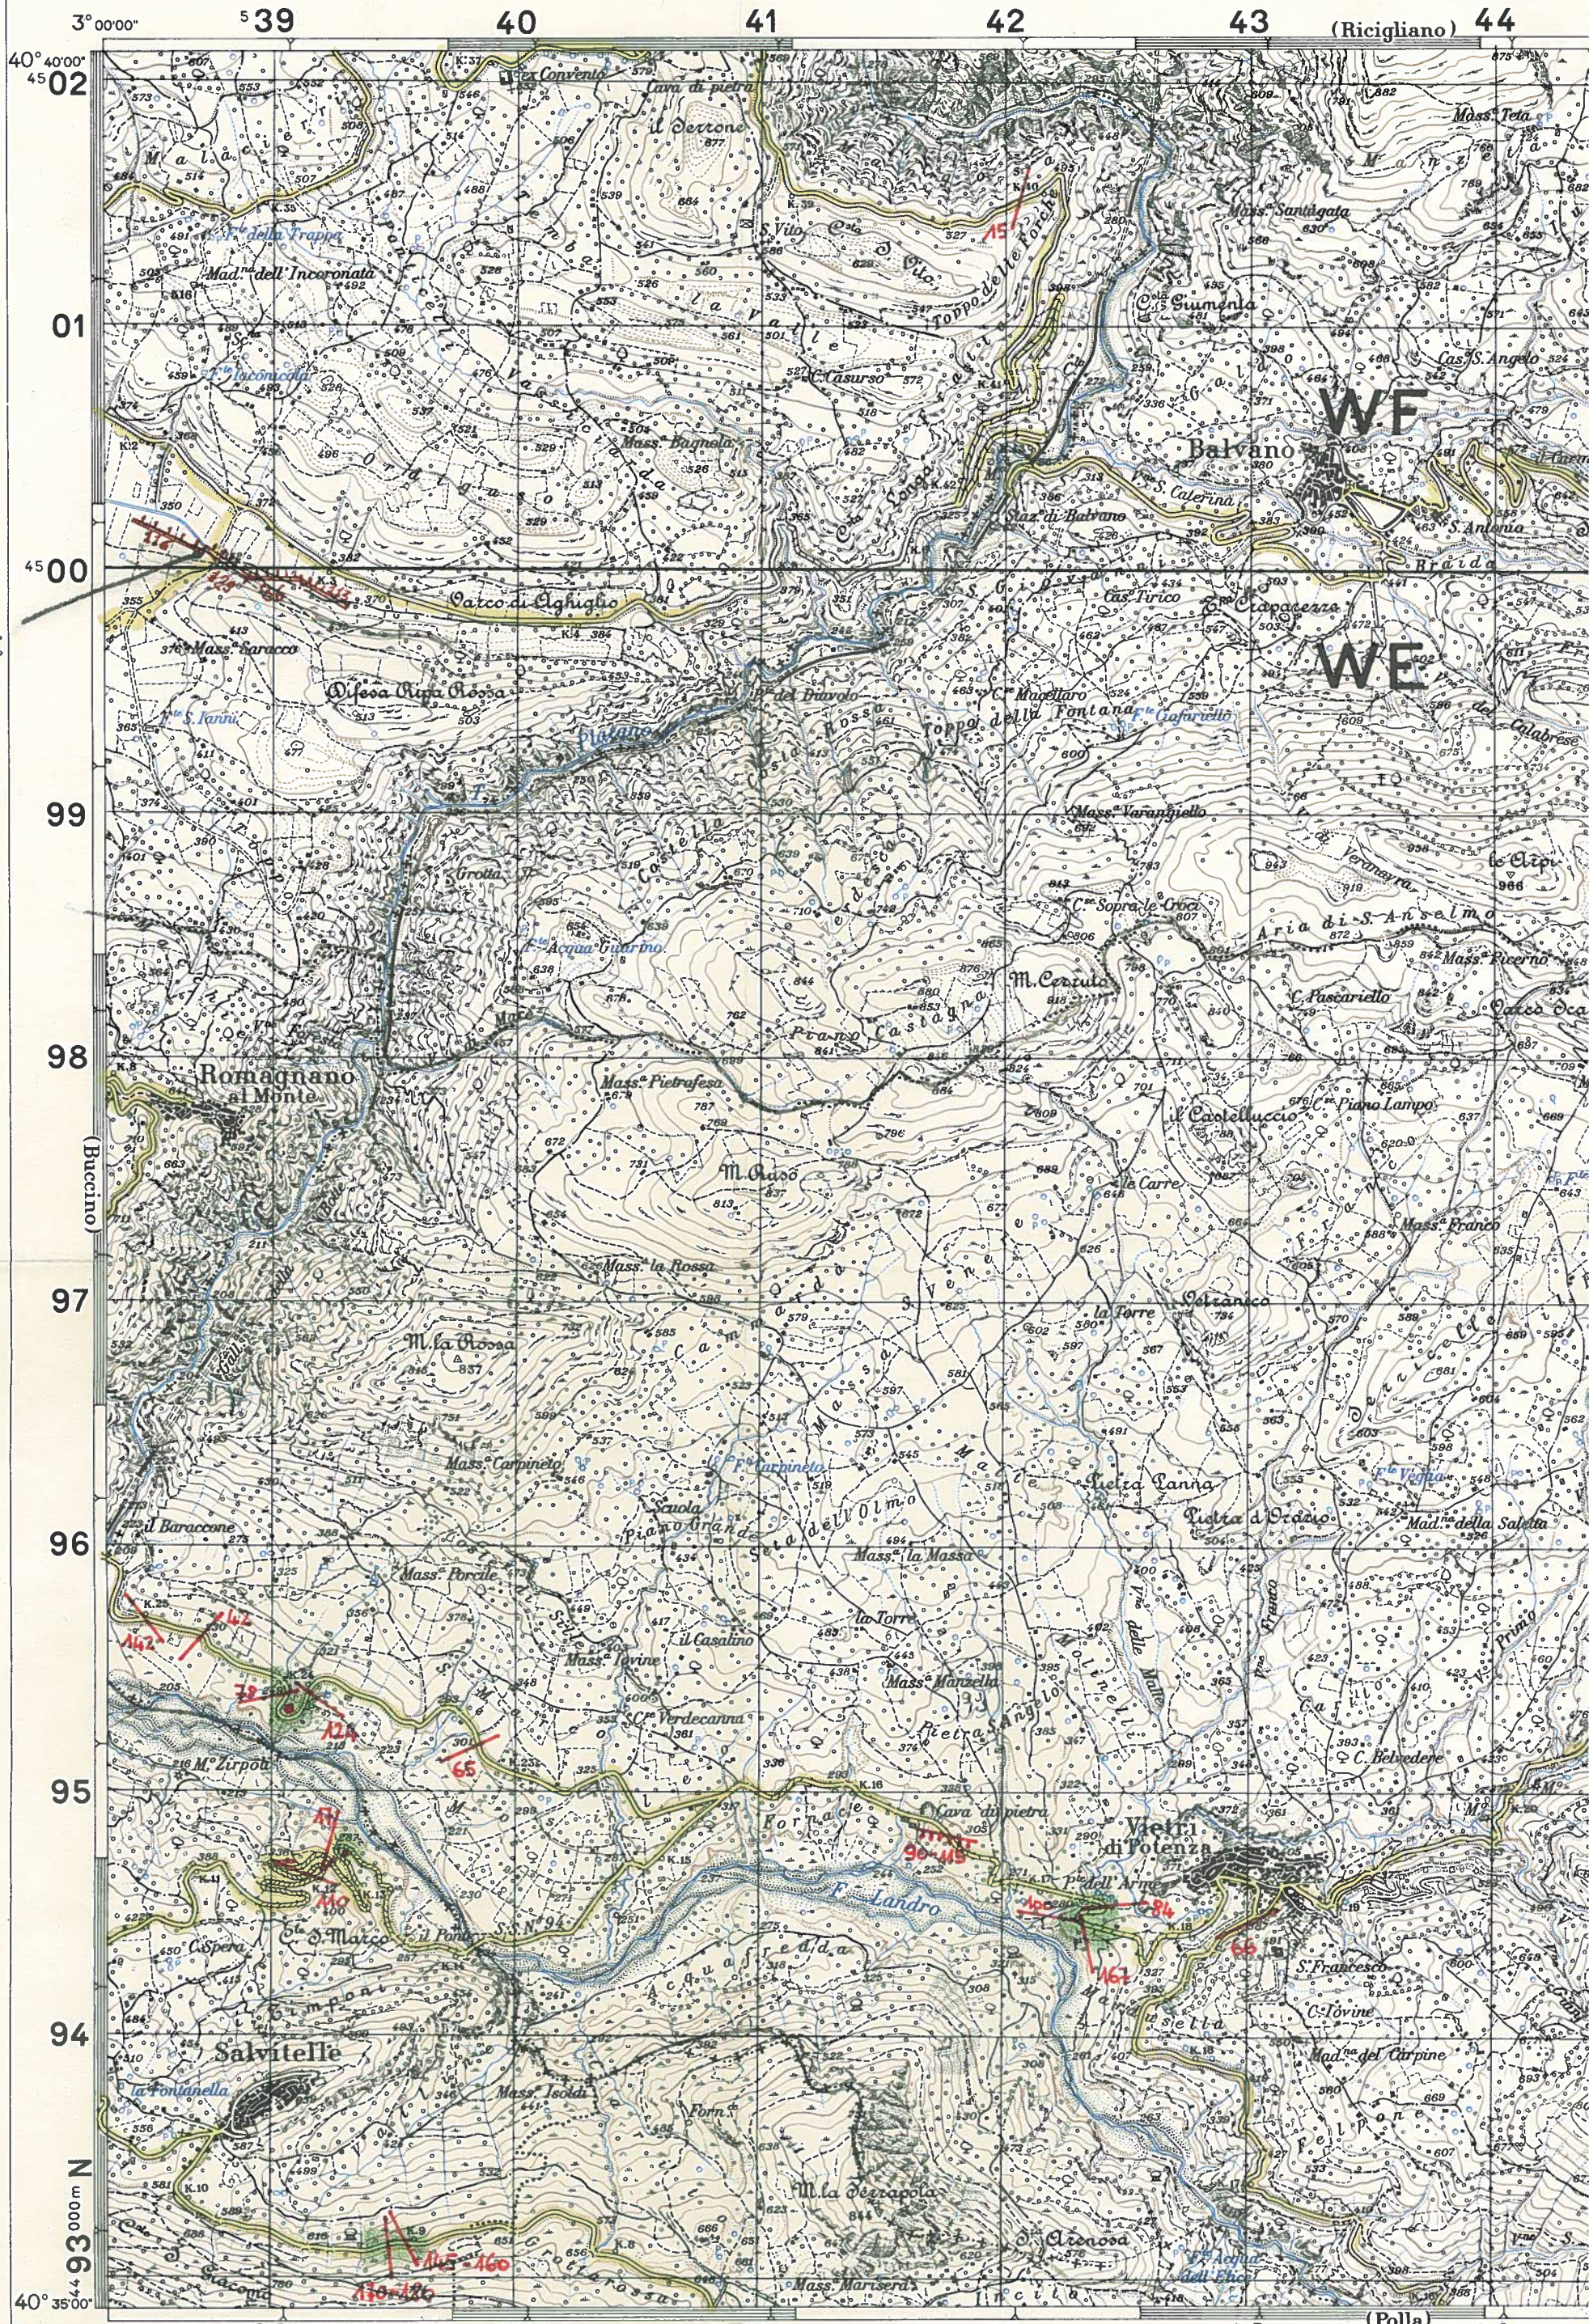



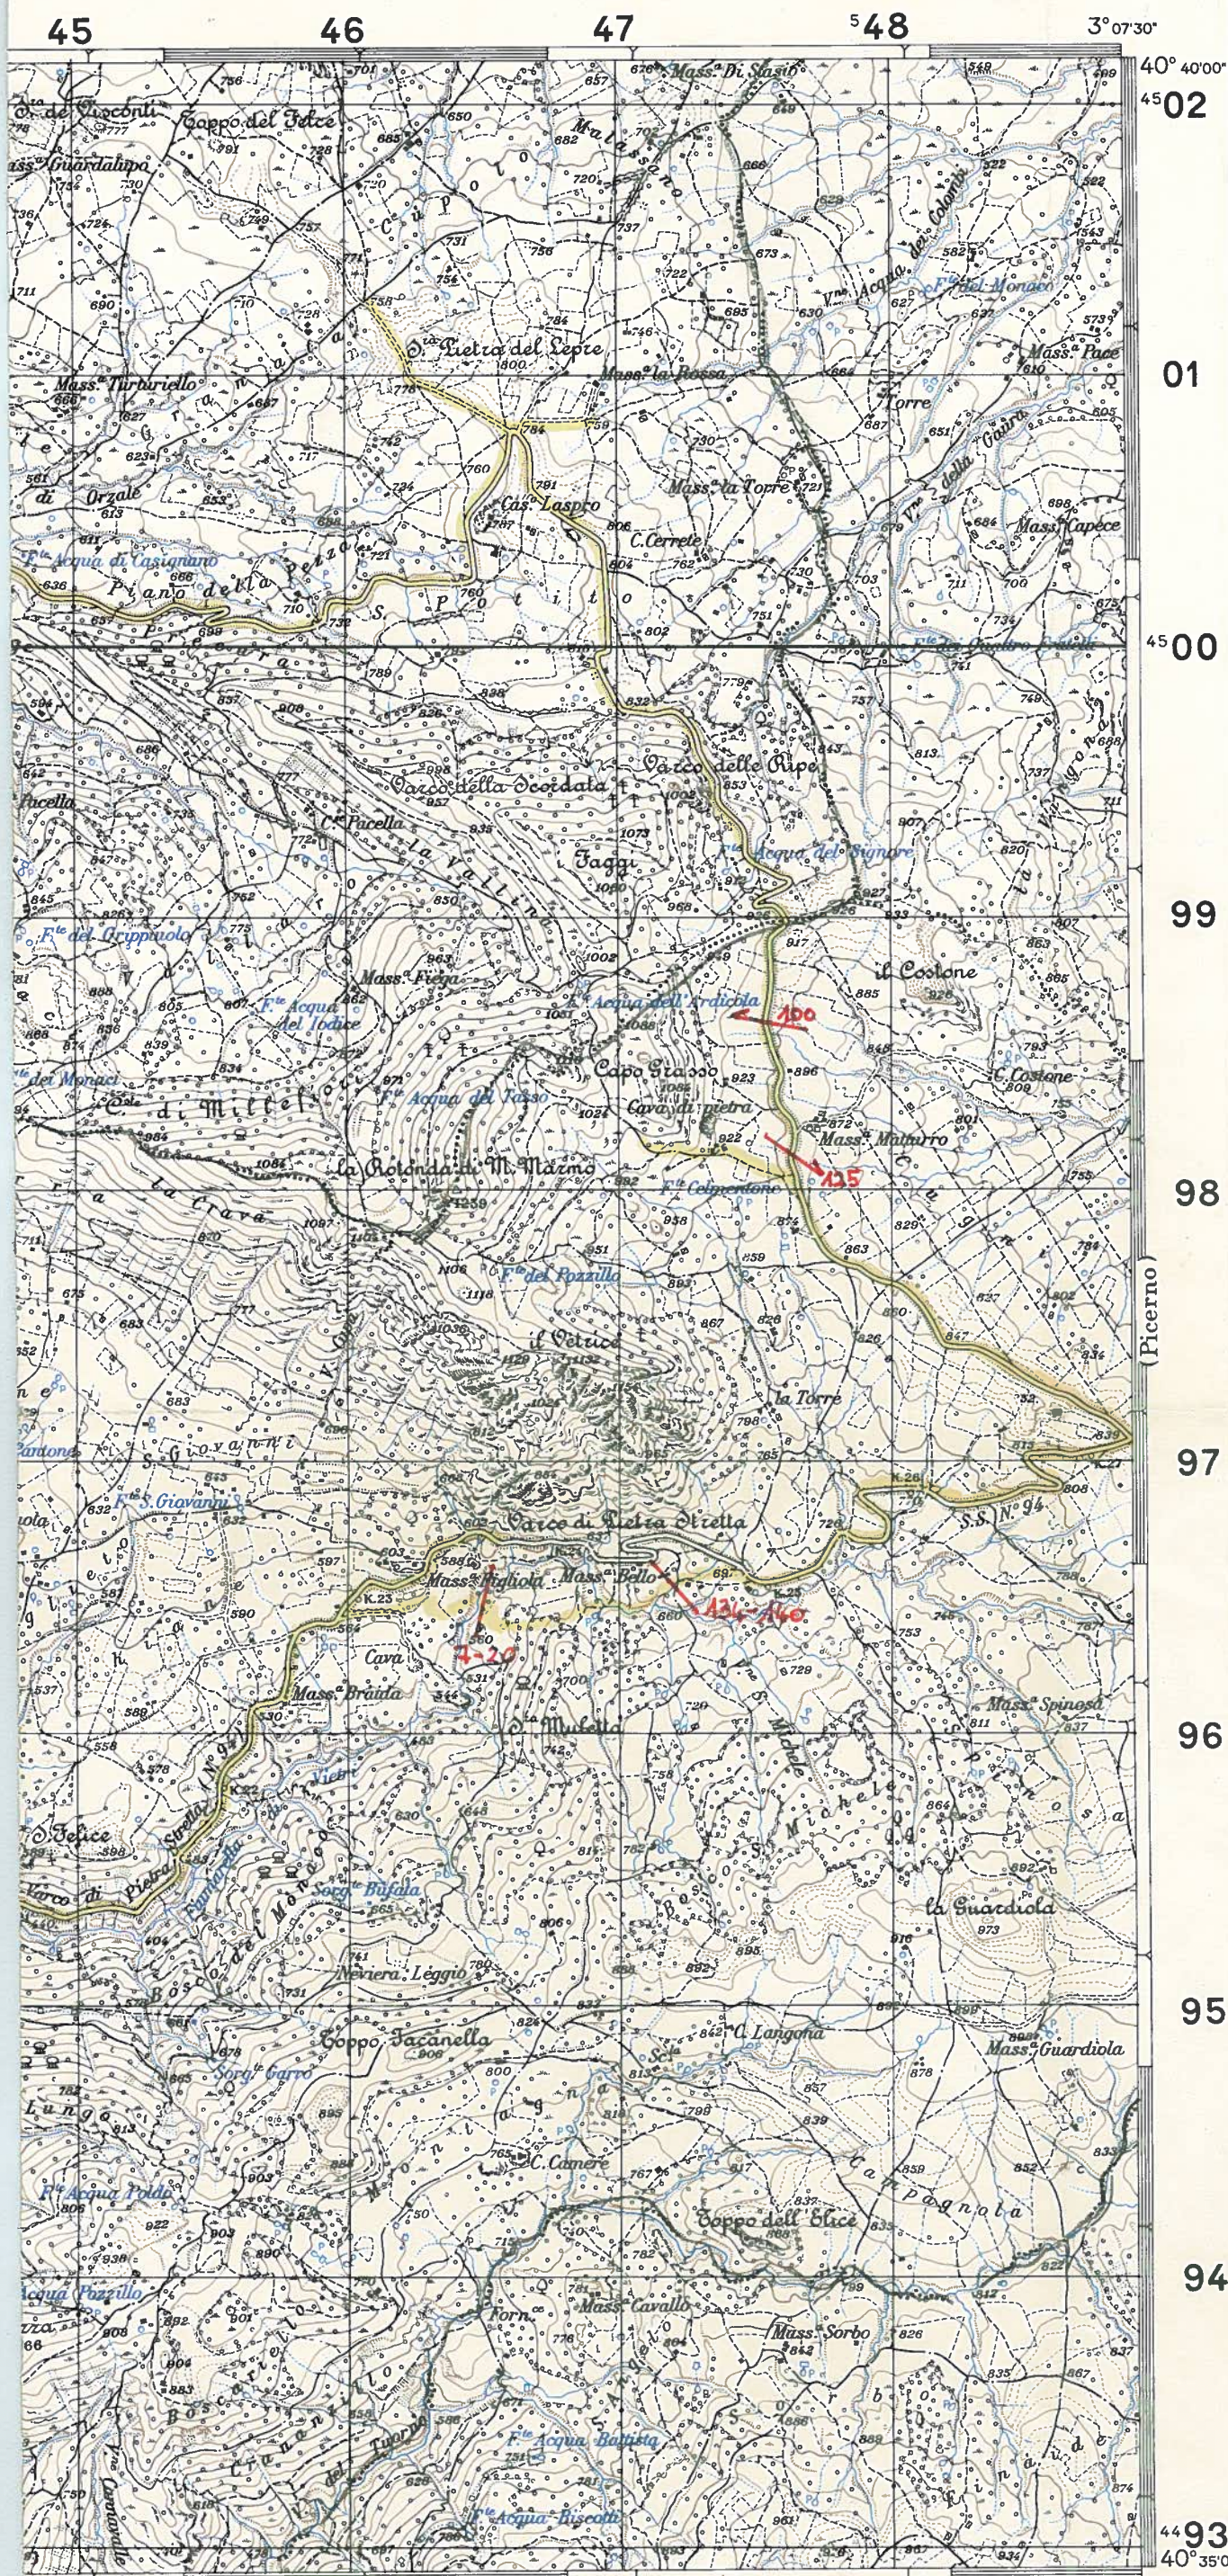

### Rapportatore per l'orientamento della carta con la bussola

RETICOLATO CHILOMETRICO  
NELLA PROIEZIONE CONFORME  
UNIVERSALE TRASVERSA DI MERCATORE

Sistema **U. T. M.**  
(Dati europei 1950)

LE LINEE CONTRASSEGNALE DA NUMERI NERI INDICATI  
RETICOLATO U. T. M. FUSO 33 ELLISSOIDE INTERNAZIONALE

|                                                                                                                                                                                                                         |                                                                                                                                                                                                                                                                                                                                                                                                                                                                                                        |                      |
|-------------------------------------------------------------------------------------------------------------------------------------------------------------------------------------------------------------------------|--------------------------------------------------------------------------------------------------------------------------------------------------------------------------------------------------------------------------------------------------------------------------------------------------------------------------------------------------------------------------------------------------------------------------------------------------------------------------------------------------------|----------------------|
| DESIGNAZIONE DI ZONA :                                                                                                                                                                                                  | ESEMPIO DI DESIGNAZIONE DI UN<br>CON L'APPROSSIMAZIONE DI UNO                                                                                                                                                                                                                                                                                                                                                                                                                                          |                      |
| 33T                                                                                                                                                                                                                     |                                                                                                                                                                                                                                                                                                                                                                                                                                                                                                        |                      |
| Identificazione di quadrato di 100 chilometri di lato :                                                                                                                                                                 | NOME DEL PUNTO :                                                                                                                                                                                                                                                                                                                                                                                                                                                                                       | q.643                |
|                                                                                                                                     | <p>1°) Leggere il valore del meridiano reticolato immediatamente ad Ovest del punto considerato e registrare le sole cifre scritte in carattere grande: misurare col coordinatometro in etto-metri la distanza tra il punto e la linea suddetta;</p> <p>2°) Leggere il valore del parallelo reticolato immediatamente a Sud del punto considerato e registrare le sole cifre scritte in carattere grande: misurare col coordinatometro in etto-metri la distanza tra il punto e la linea suddetta;</p> |                      |
|                                                                                                                                                                                                                         | DESIGNAZIONE DEL PUNTO :                                                                                                                                                                                                                                                                                                                                                                                                                                                                               |                      |
| <p>Trascurare nella designazione del punto le cifre scritte in carattere piccolo di ogni numero del reticolato. Queste sono utilizzate nei calcoli.</p> <p>Usare soltanto le cifre scritte in carattere più grande.</p> | <p>Preporre le lettere che contraddistinguono il quadrato di 100 km di lato quando non si è certi che il destinatario della segnalazione già le conosca inequivocabilmente:</p> <p>Preporre parimenti la designazione di zona quando non si è certi che la stessa sia già ben nota:</p>                                                                                                                                                                                                                | <p>W</p> <p>33TW</p> |

DECLINAZIONE MAGNETICA (AL 1° GENNAIO 1948) E CONVERGENZA  
AL CENTRO DELLA CARTA

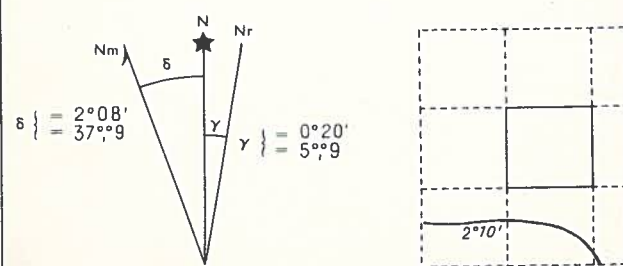

Nr = Nord reticolato  
N = Nord geografico  
Nm = Nord magnetico  
 $\delta$  = Declinazione magnetica  
 $\gamma$  = Convergenza

Nel grafico sono tracciate le  
egual declinazione intervallate  
eventuali zone di anomalia mag  
rappresentate con tratteggio.

La declinazione magnetica diminuisce annualmente di circa  $7'' = 2$

Le coordinate dei vertici di questa carta nel reticolato italiano (proiezione Gaussiana ellissoide internazionale, orientamento a M. Mario 1940) sono le seguenti:

FUSO EST

$$\begin{array}{l} \text{N. O.} \left\{ \begin{array}{l} \text{E} = 2558235 \\ \text{N} = 4501931 \end{array} \right. \qquad \text{N. E.} \left\{ \begin{array}{l} \text{E} = 2568801 \\ \text{N} = 4501993 \end{array} \right. \\ \text{S. O.} \left\{ \begin{array}{l} \text{E} = 2558282 \\ \text{N} = 4492681 \end{array} \right. \qquad \text{S. E.} \left\{ \begin{array}{l} \text{E} = 2568861 \\ \text{N} = 4492743 \end{array} \right. \end{array}$$

Nelle carte sulle quali è stato tracciato il reticolato italiano, questo è indicato in una cornice con i seguenti segni convenzionali: fuso est  fuso ovest 

COORDINATOMETRO

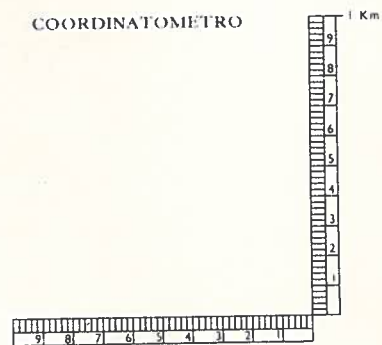

## AVVERTENZA
